# Supplementary material for: A three-component, general and practical route for diastereoselective synthesis of aza-spirocyclic pyrazolones via a decarboxylative annulation process
Source: Royal Society of Chemistry journal article supplement (doi:10.1039/d0nj05915c), 2021-01-01

# Three Component, General and Practical Route for Diastereoselective Synthesis of Aza-Spirocyclic Pyrazolones via Decarboxylative Annulation Process

Annapurna Awasthi,<sup>a,b</sup> Pushpendra Yadav,<sup>a,b</sup> and Dharmendra Kumar Tiwari,<sup>\*a</sup>

Molecular Synthesis and Drug Discovery Unit, Center of Biomedical Research (CBMR), SGPGIMS Campus, Raibareli Road, Lucknow, U.P. 226014, INDIA.

Email: [dkt80.org@gmail.com](mailto:dkt80.org@gmail.com) & [dktiwari@cbmr.res.in](mailto:dktiwari@cbmr.res.in)

Department of Chemistry, Institute of Science, Banaras Hindu University, 221005, U.P. INDIA.

## Table of Contents

|          |                                                                        |             |
|----------|------------------------------------------------------------------------|-------------|
| <b>1</b> | Soft Copies of <sup>1</sup> H and <sup>13</sup> C NMR of all compounds | <b>2-36</b> |
|----------|------------------------------------------------------------------------|-------------|

### <sup>1</sup>H NMR spectra of 4aaa

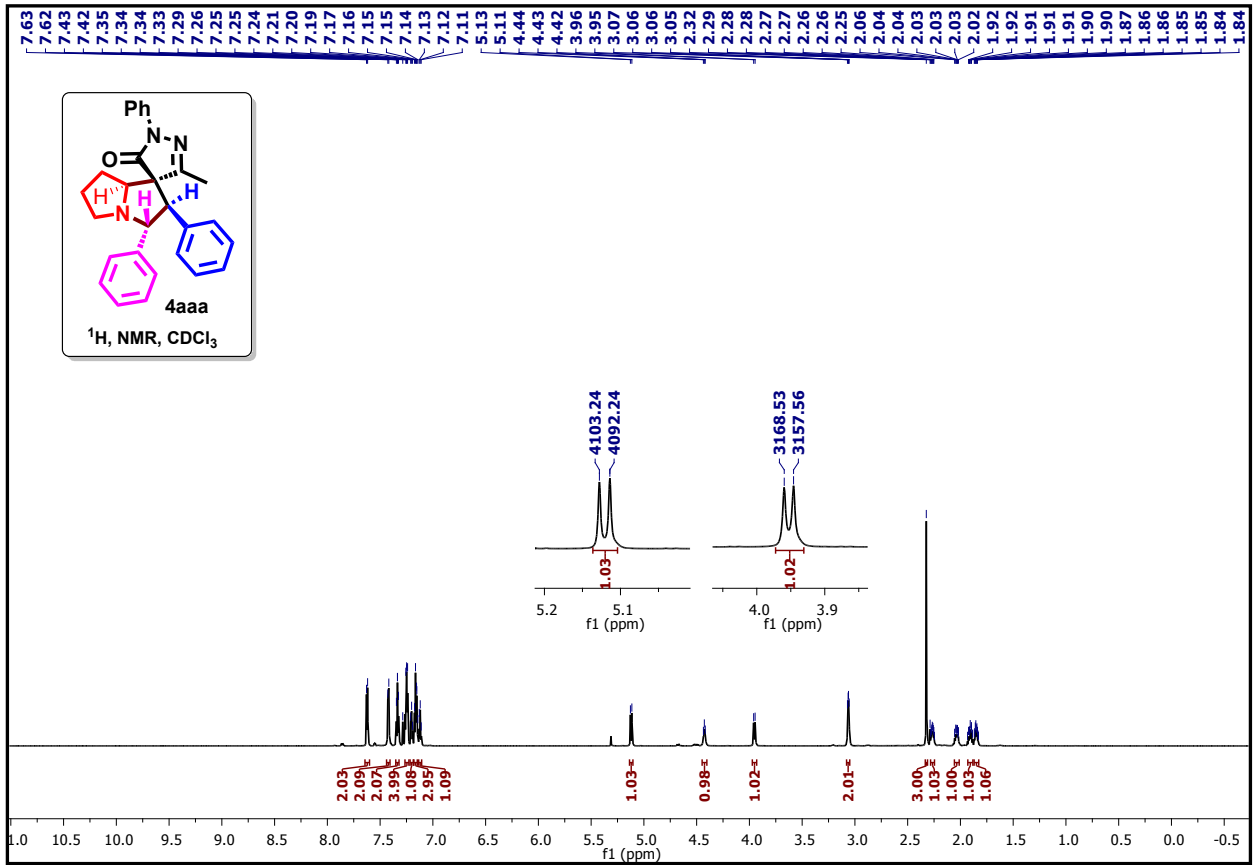

### <sup>13</sup>C NMR spectra of 4aaa

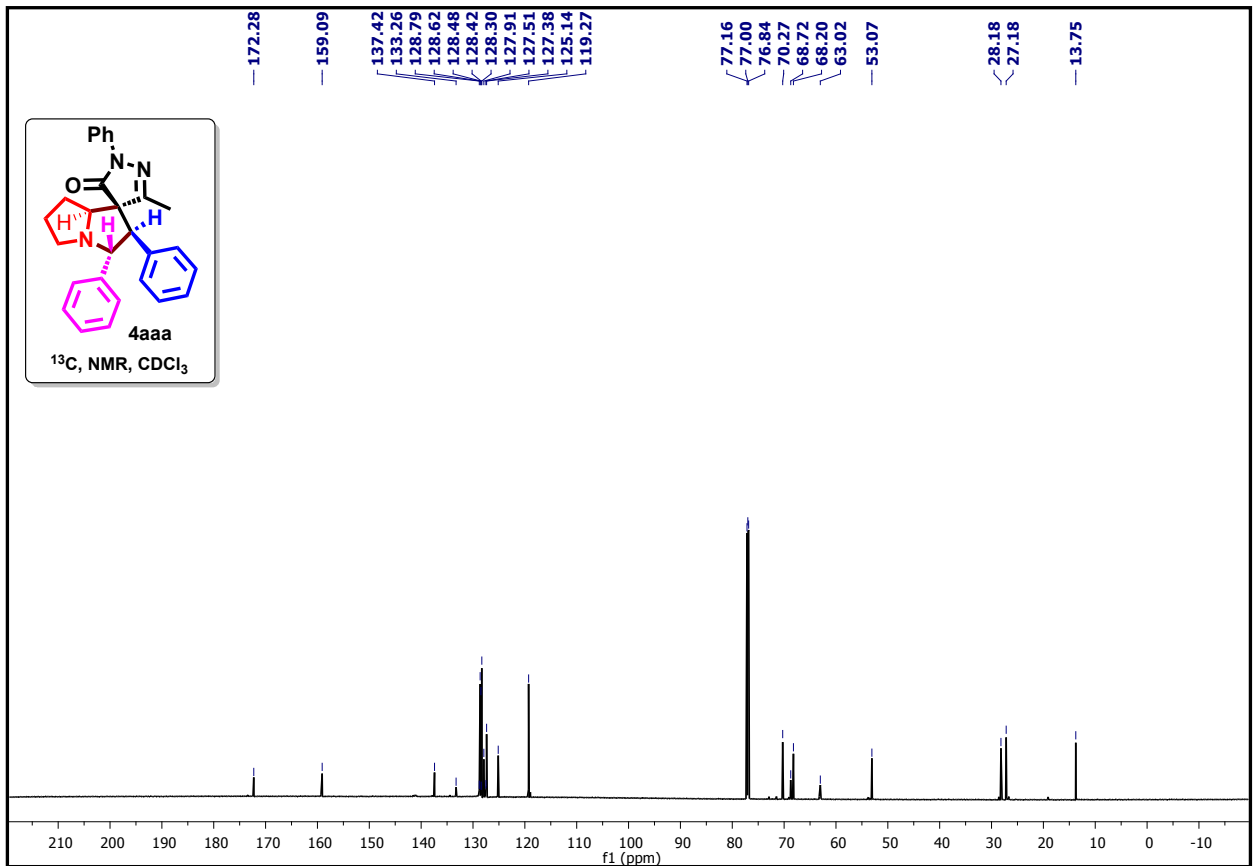

<sup>1</sup>H NMR spectra of 4aba

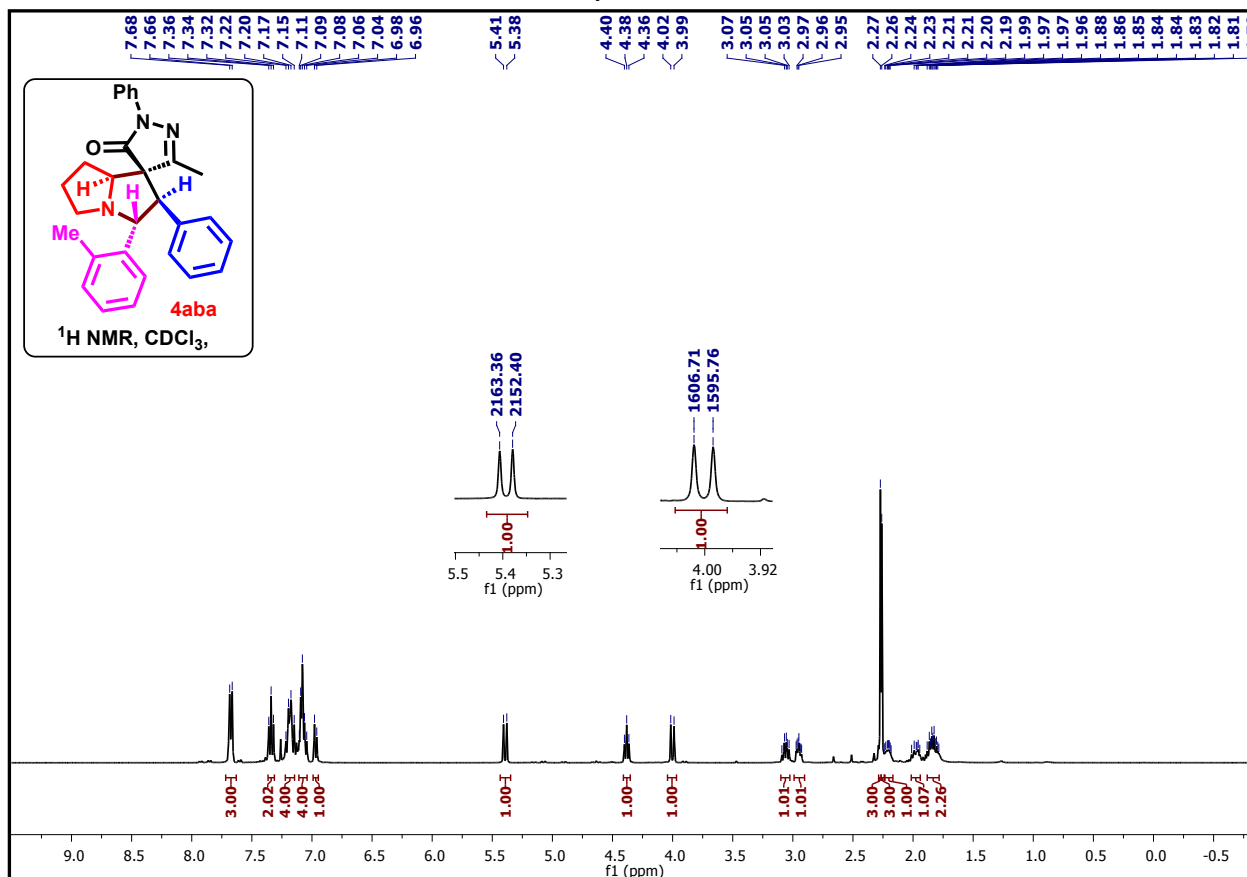

<sup>13</sup>C NMR spectra of 4aba

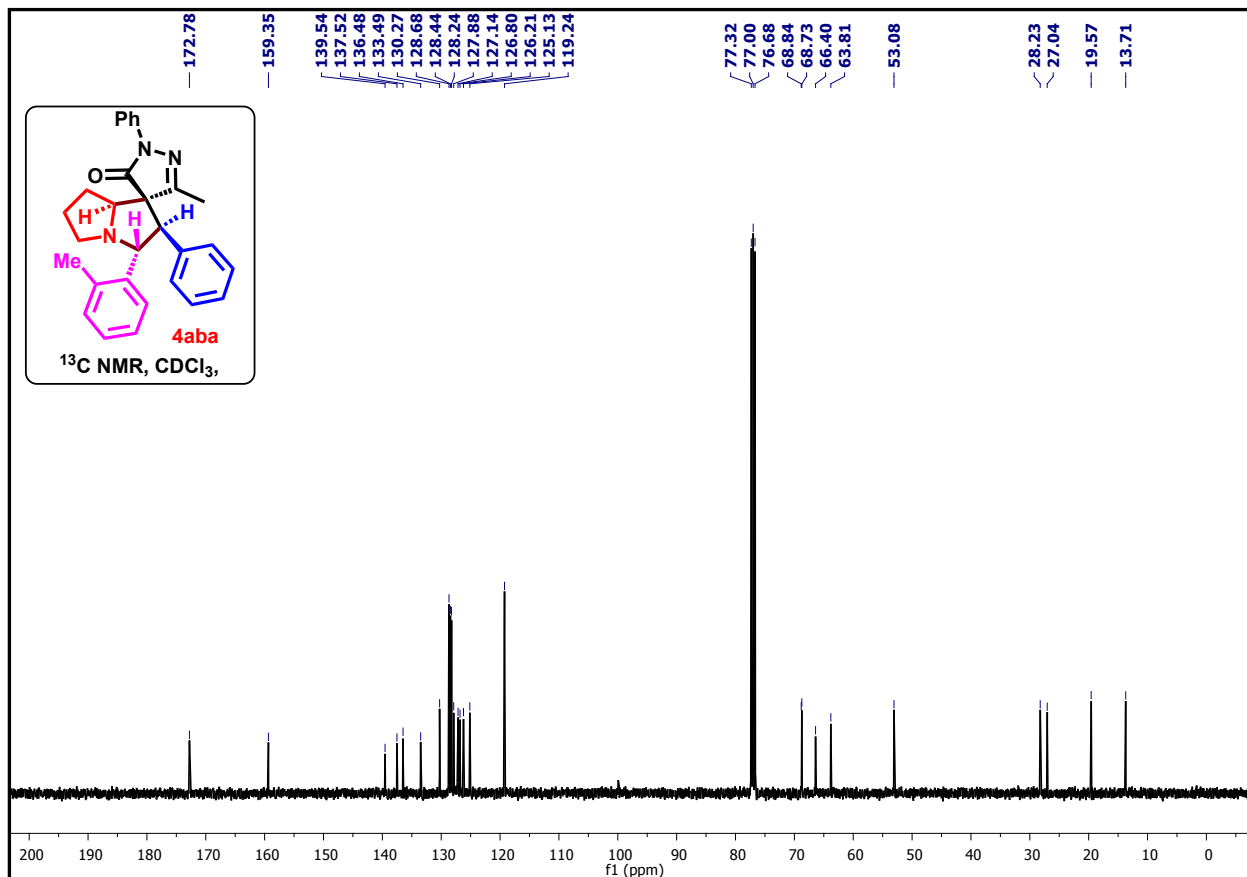

### <sup>1</sup>H NMR spectra of 4aca

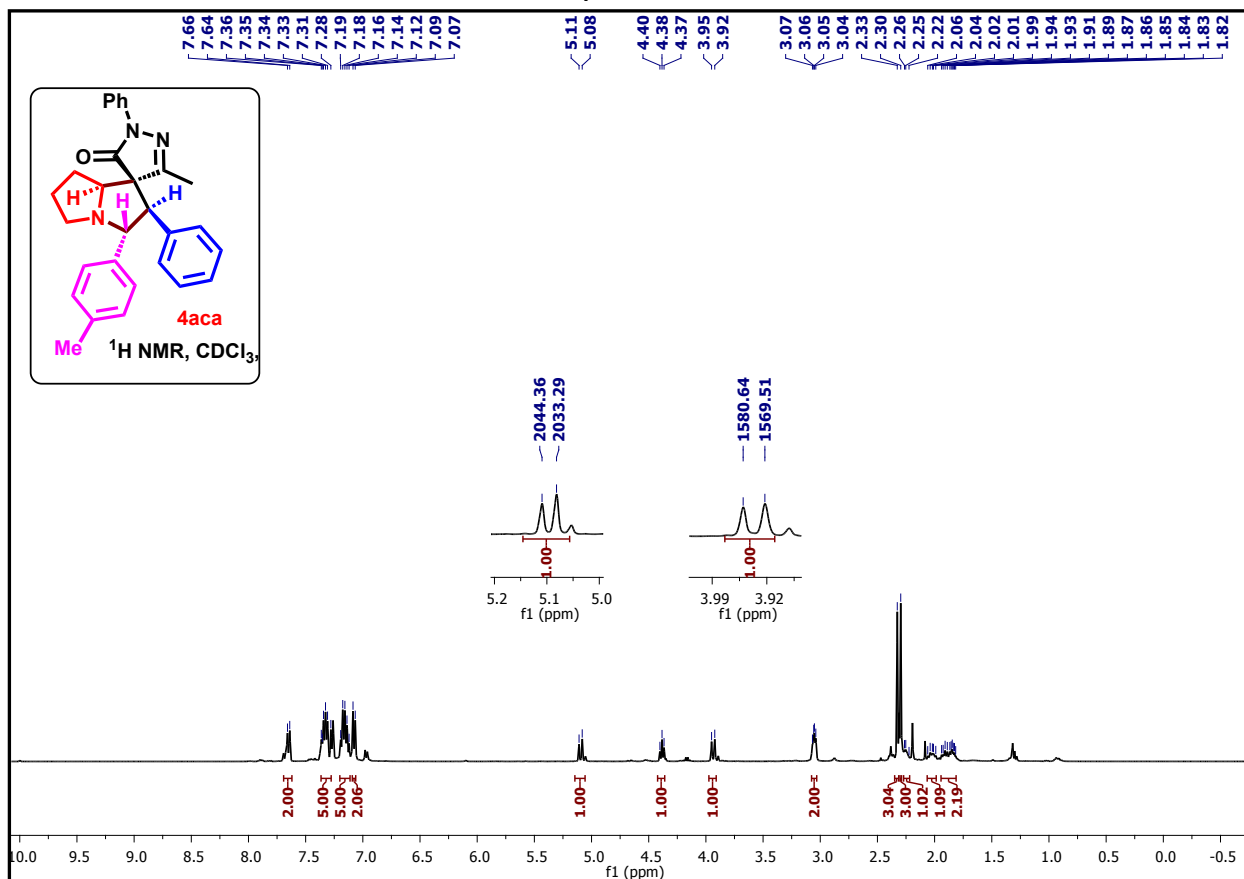

### <sup>13</sup>C NMR spectra of 4aca

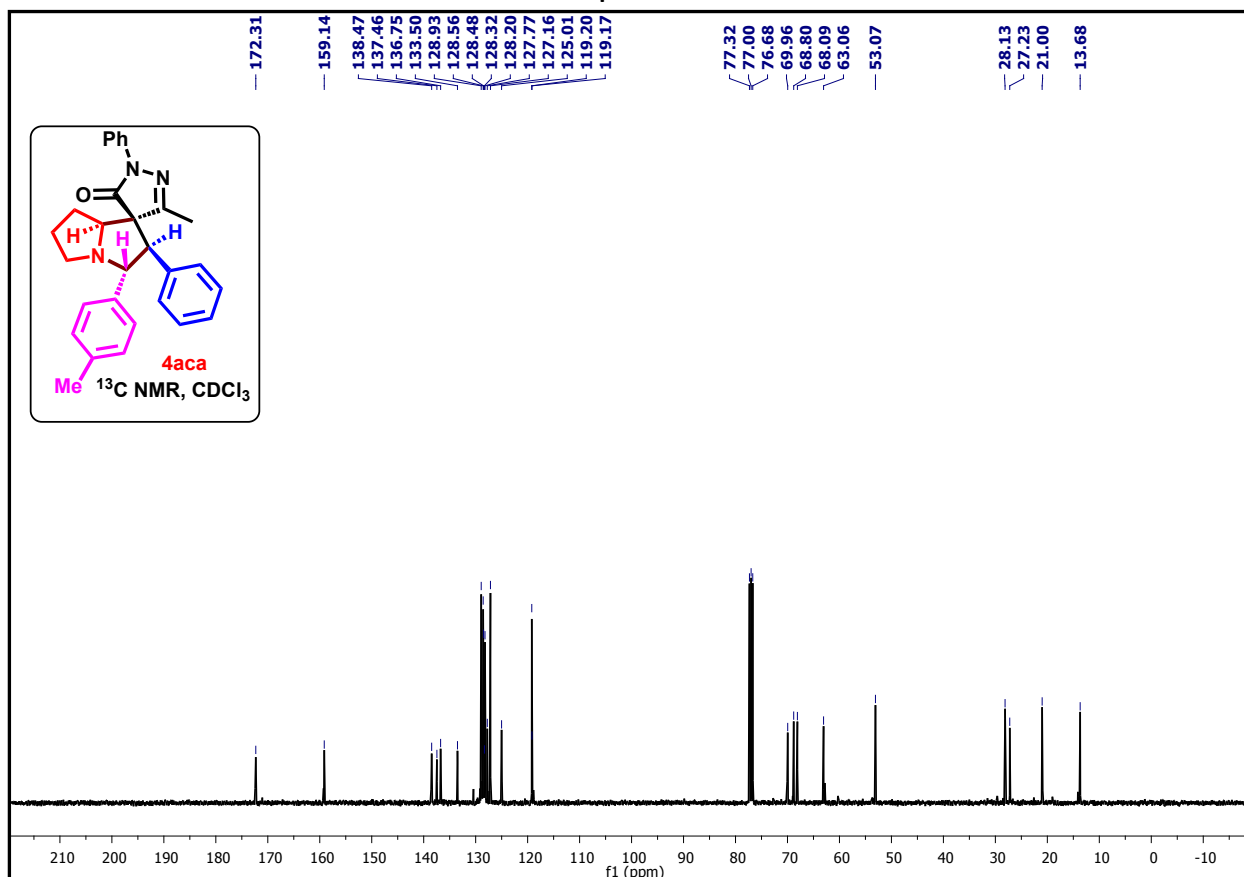

### <sup>1</sup>H NMR spectra of 4ada

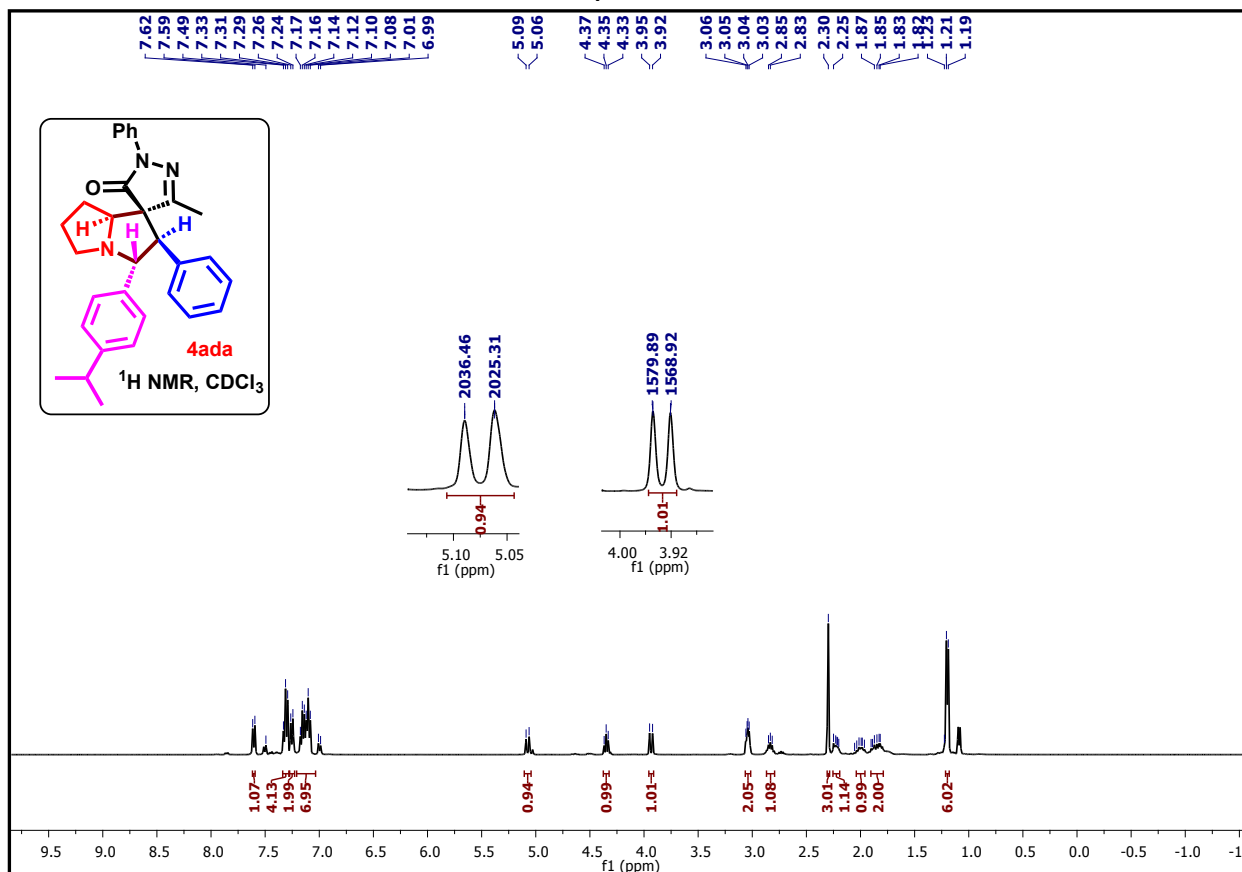

### <sup>13</sup>C NMR of 4ada

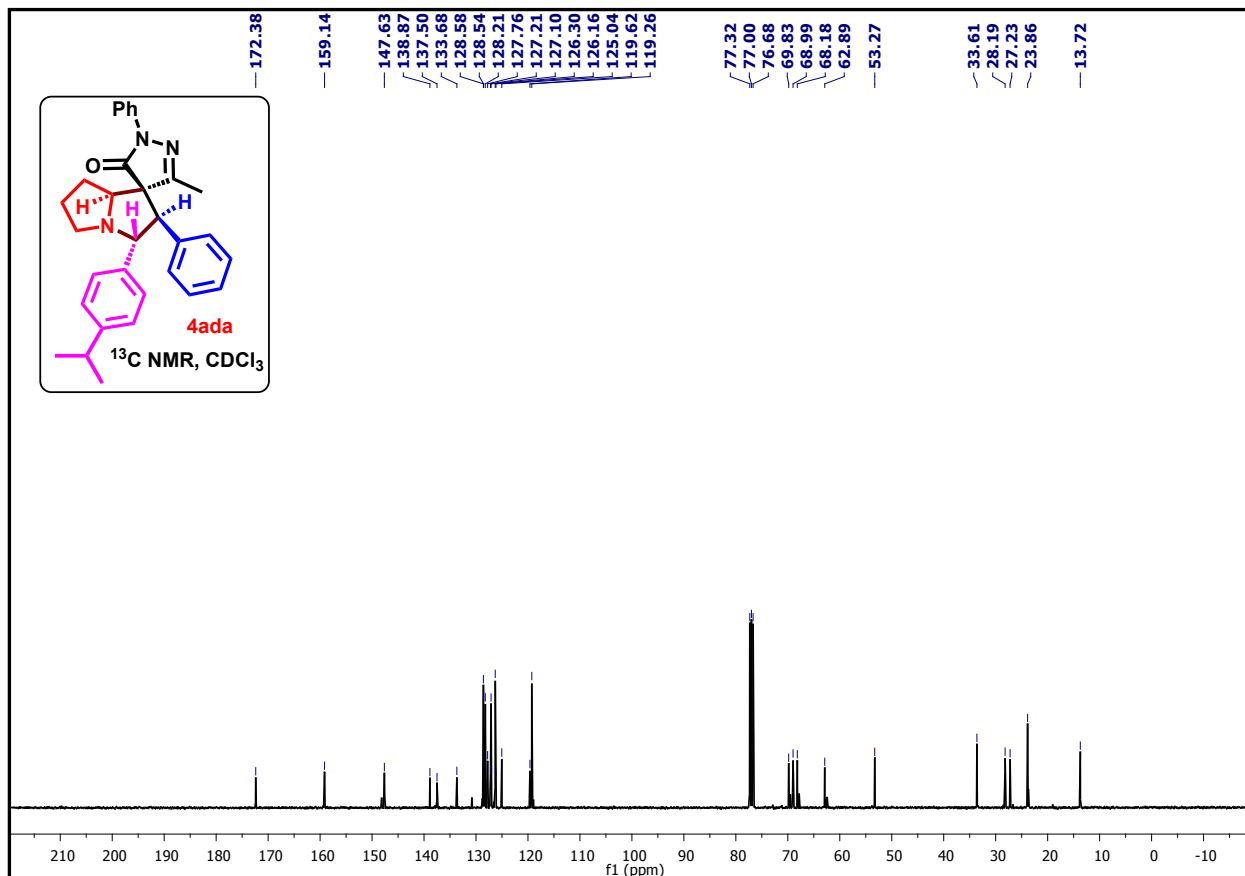

### <sup>1</sup>H NMR spectra of 4aea

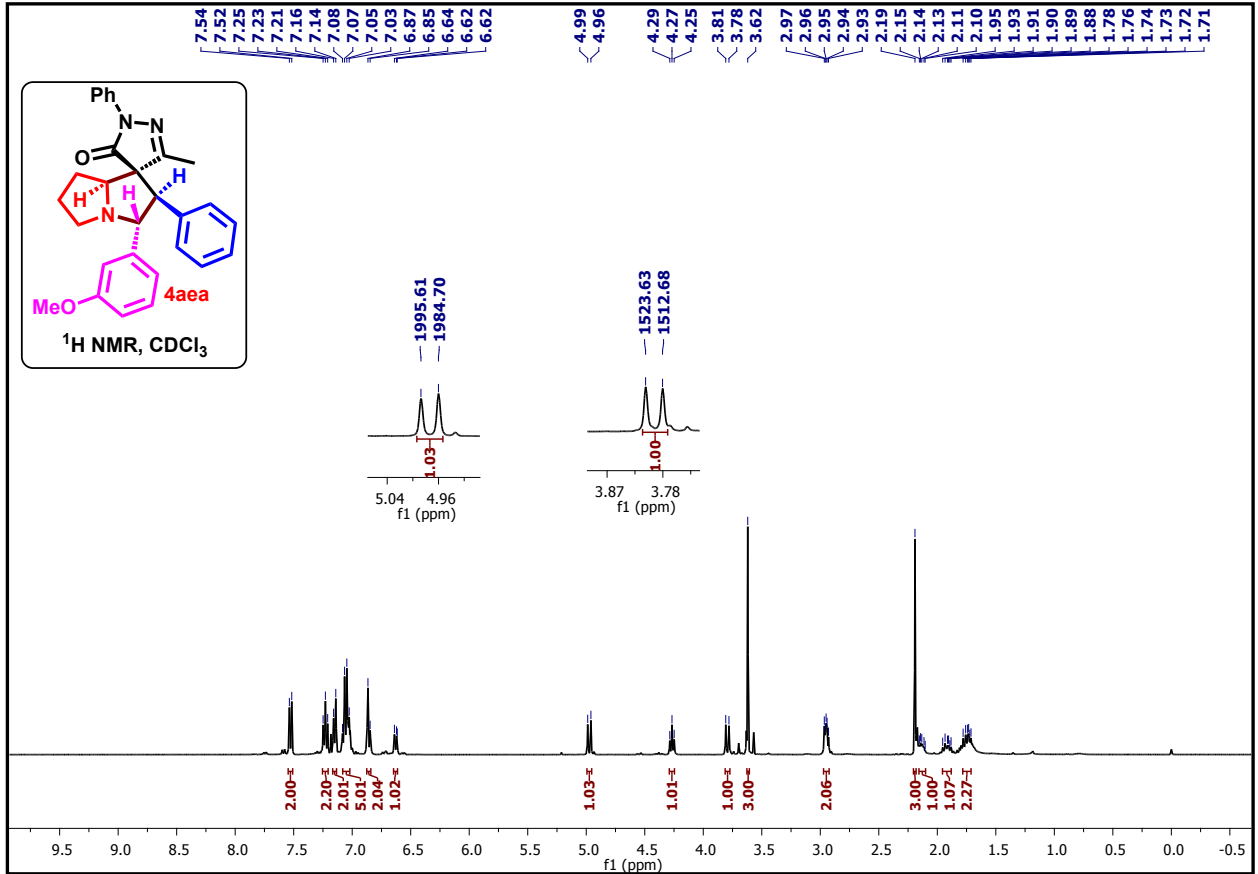

### <sup>13</sup>C NMR spectra of 4aea

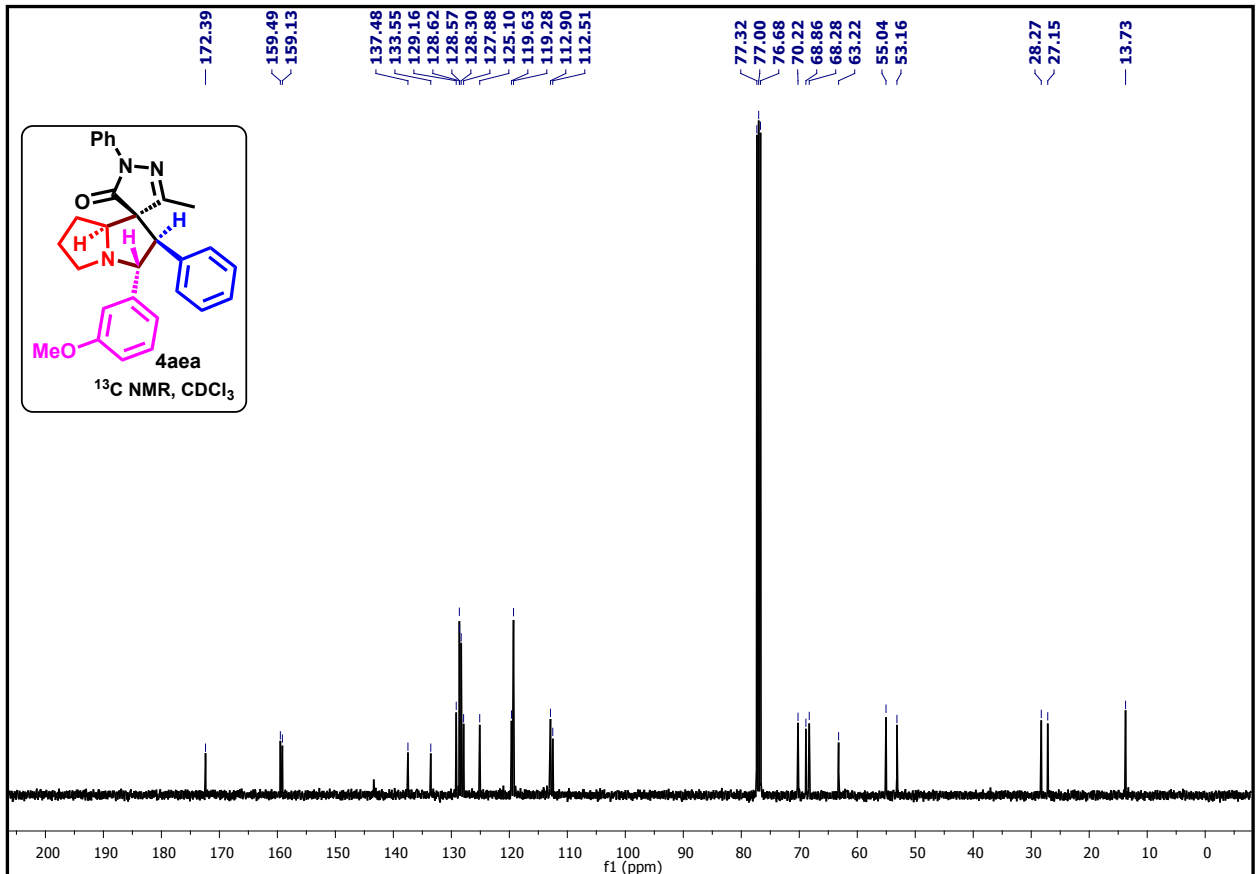

### <sup>1</sup>H NMR spectra of 4afa

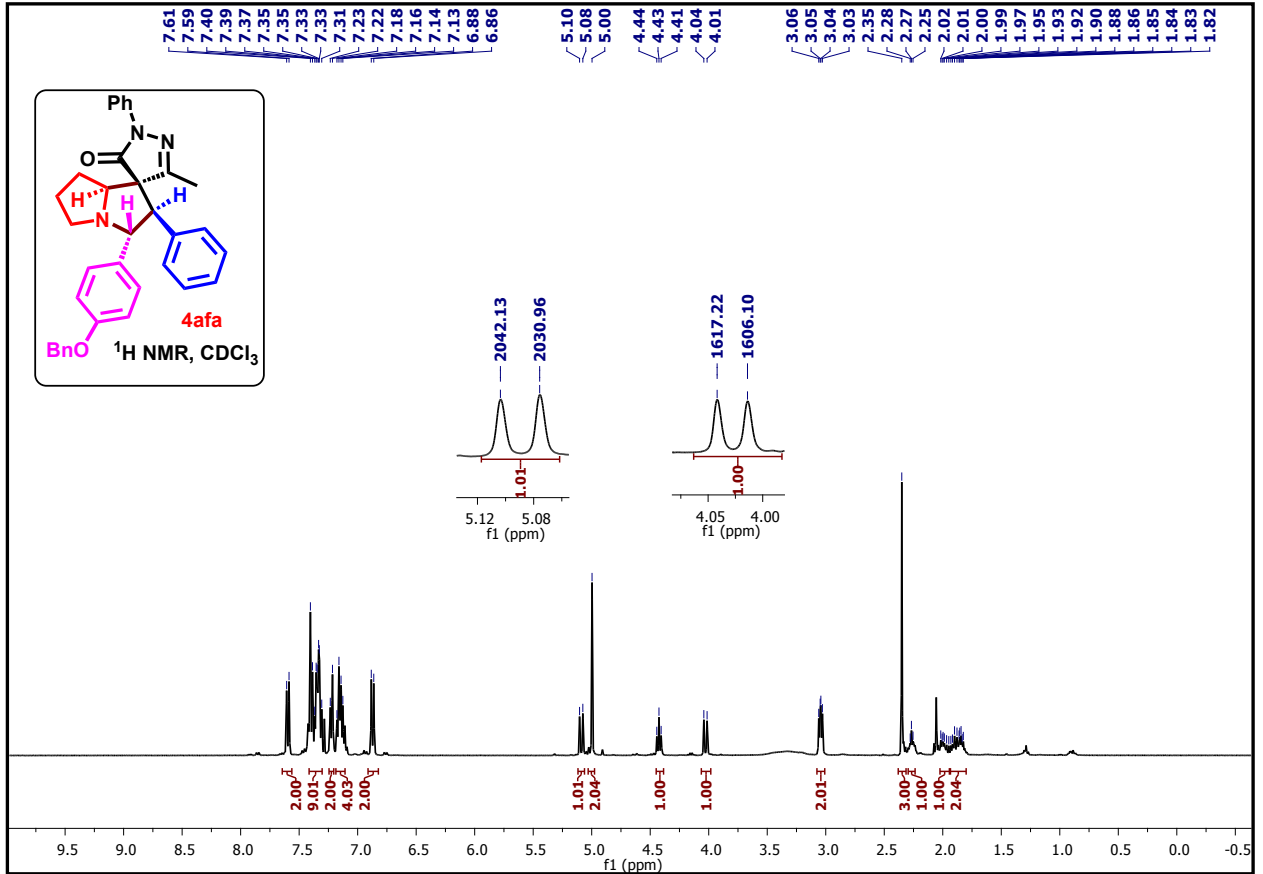

### <sup>13</sup>C NMR spectra of 4afa

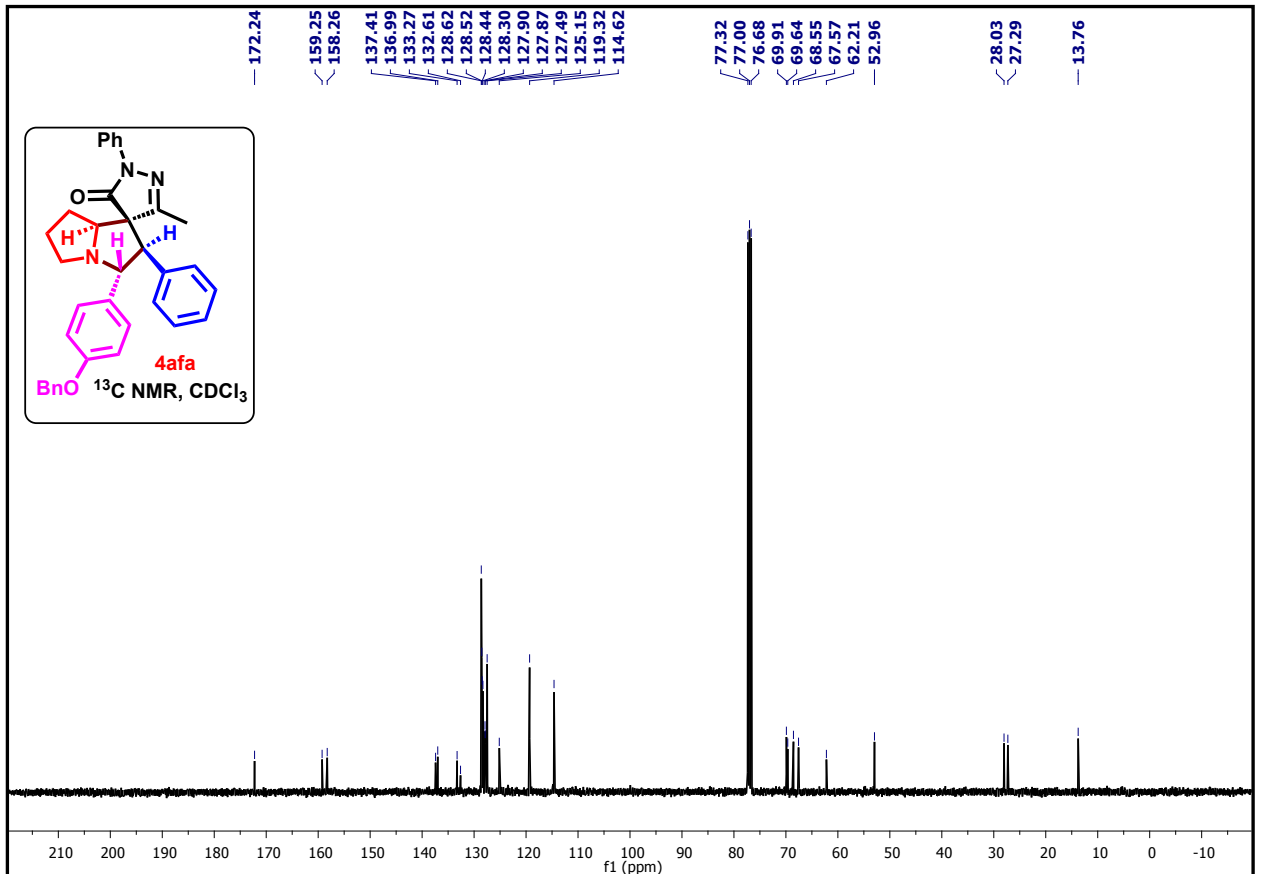

### <sup>1</sup>H NMR spectra of 4aga

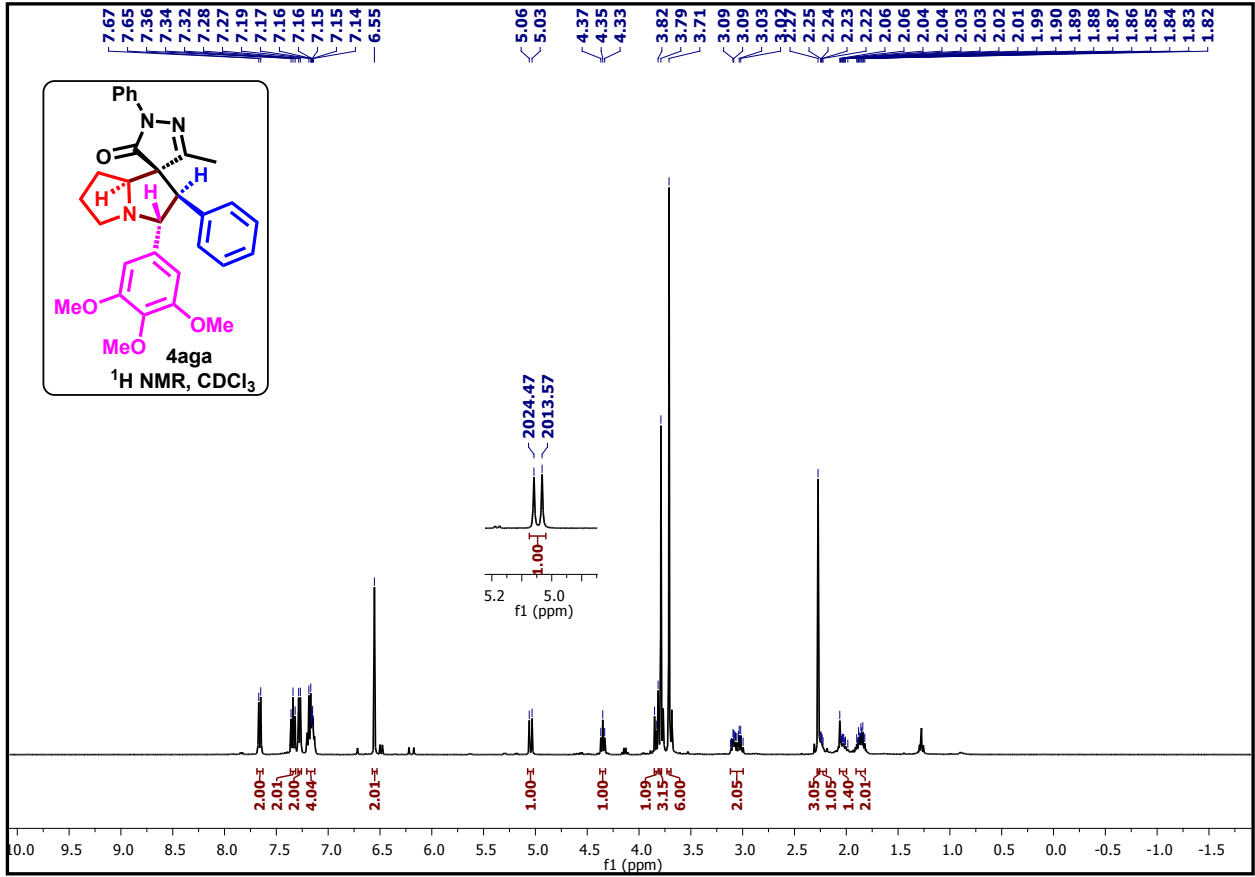

### <sup>13</sup>C NMR spectra of 4aga

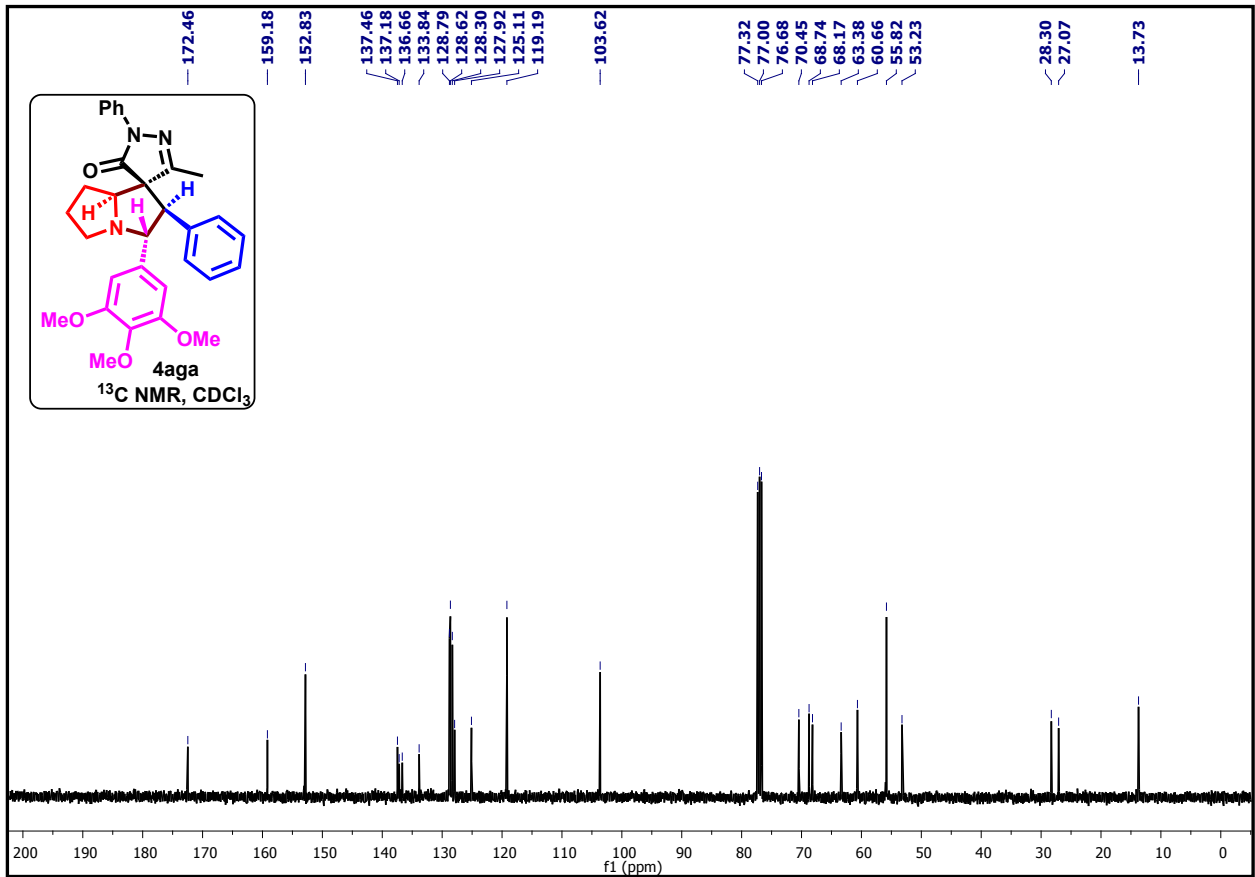



### <sup>1</sup>H NMR spectra of 4aha

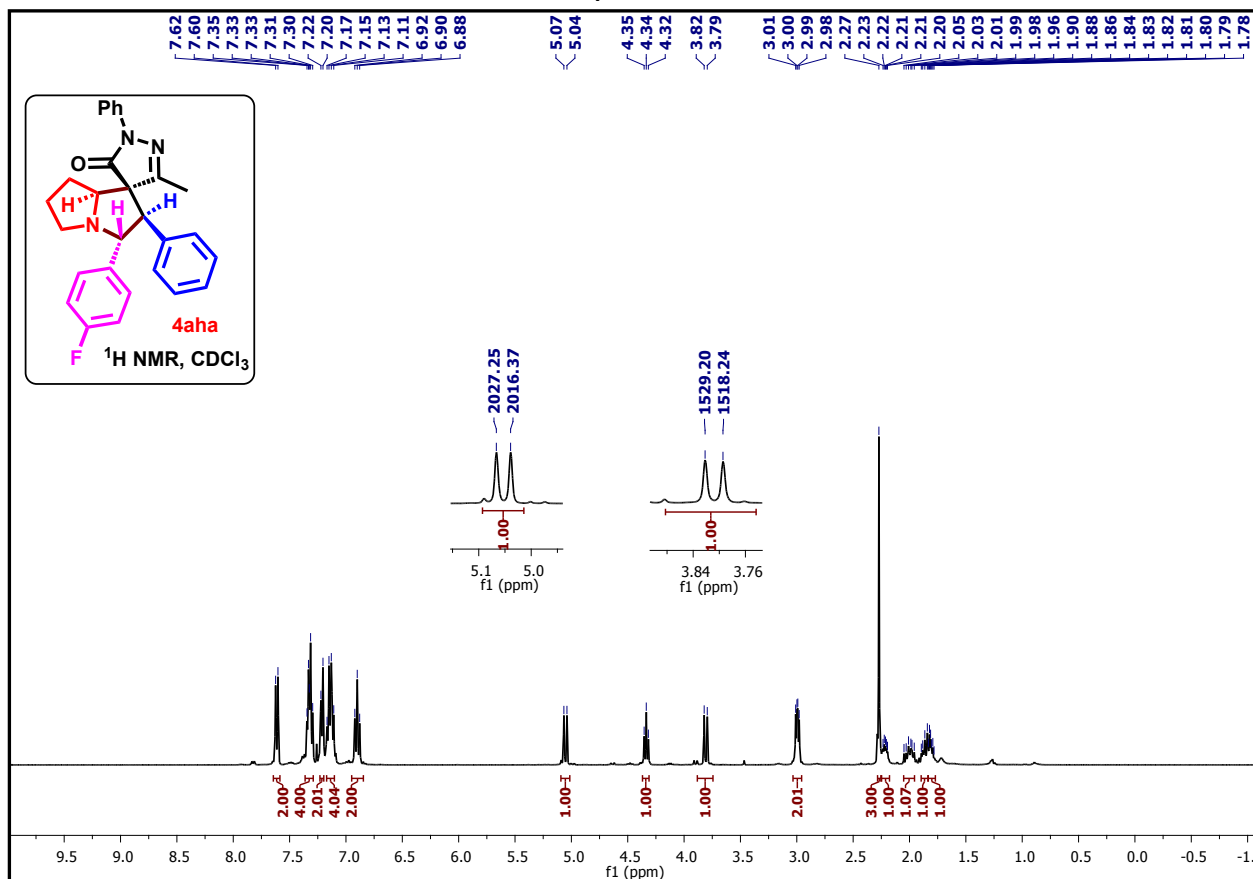

### <sup>13</sup>C NMR spectra of 4aha

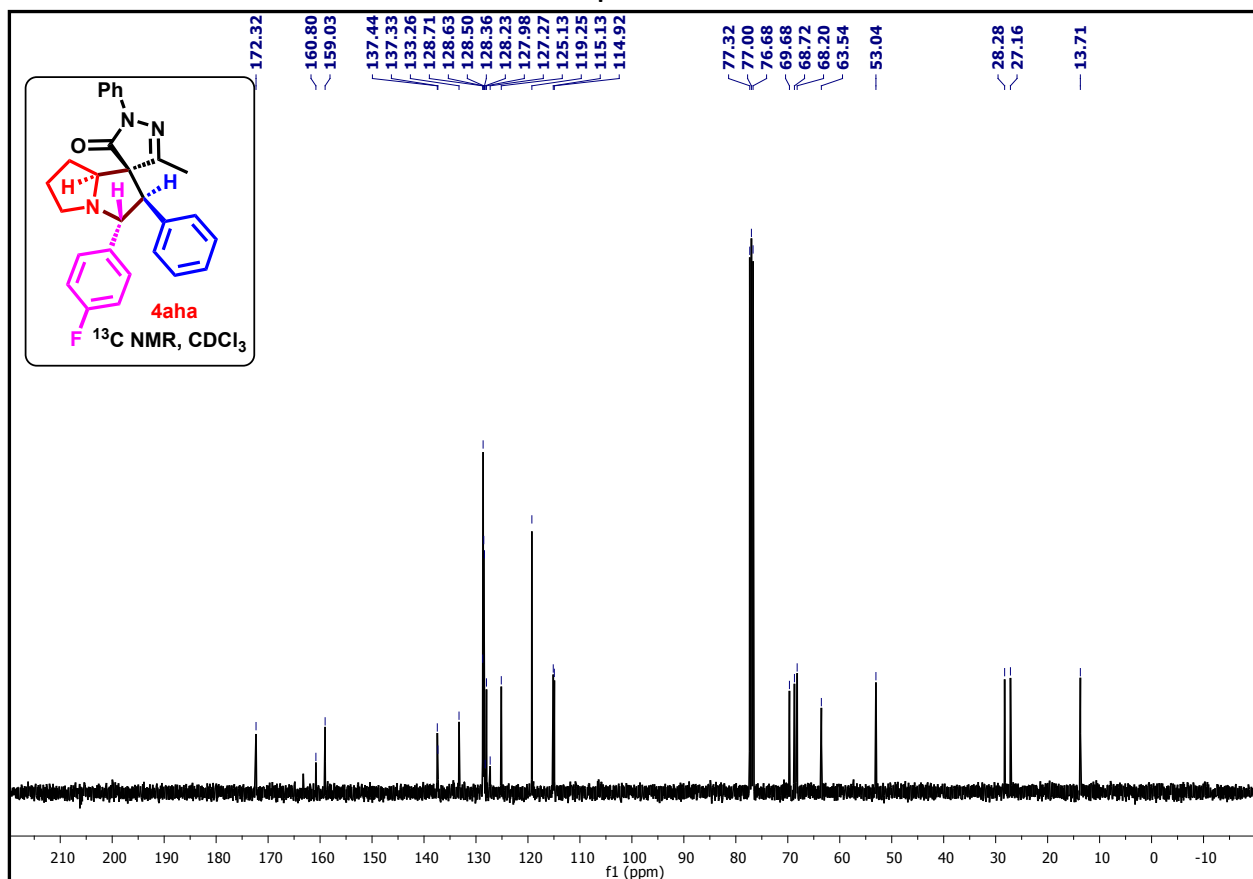

### <sup>1</sup>H NMR spectra of 4aia

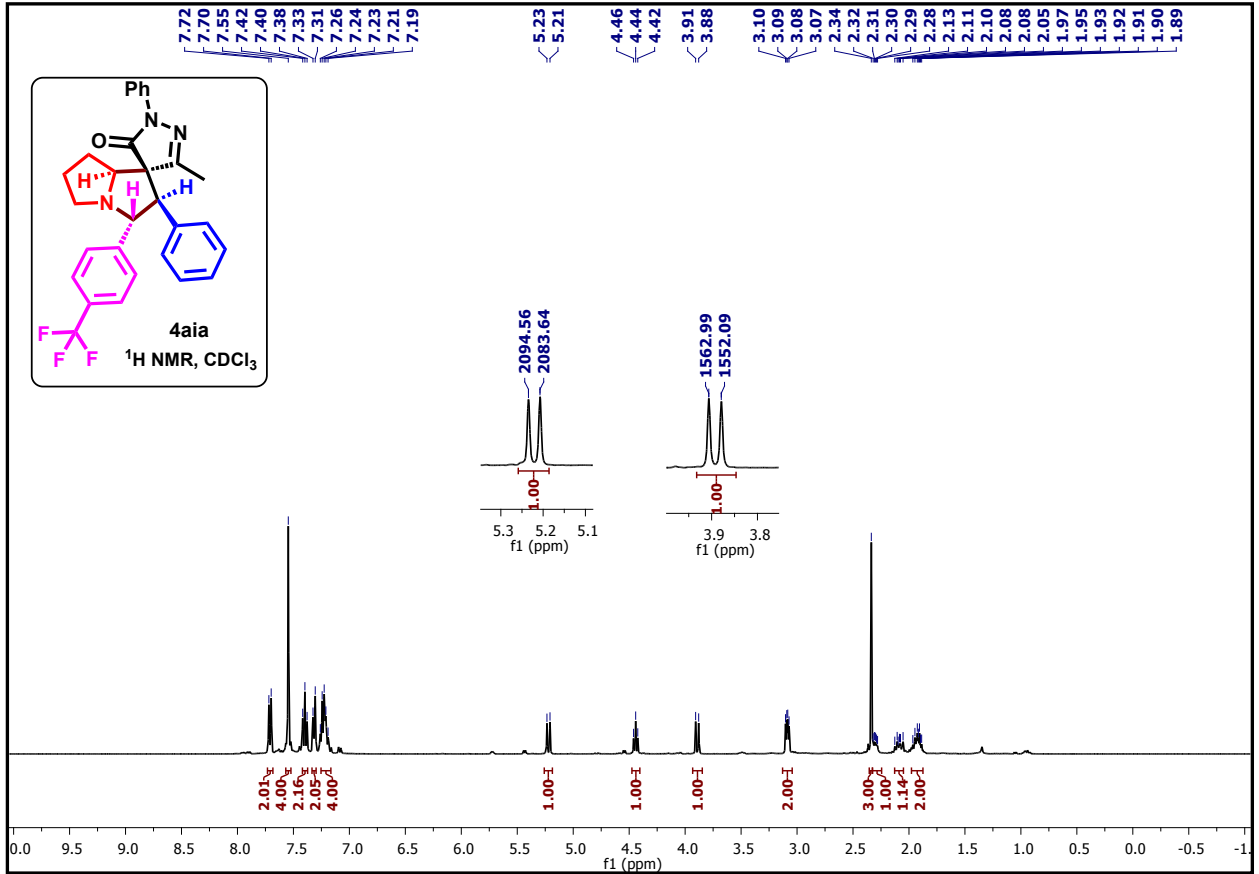

### <sup>13</sup>C NMR spectra of 4aia

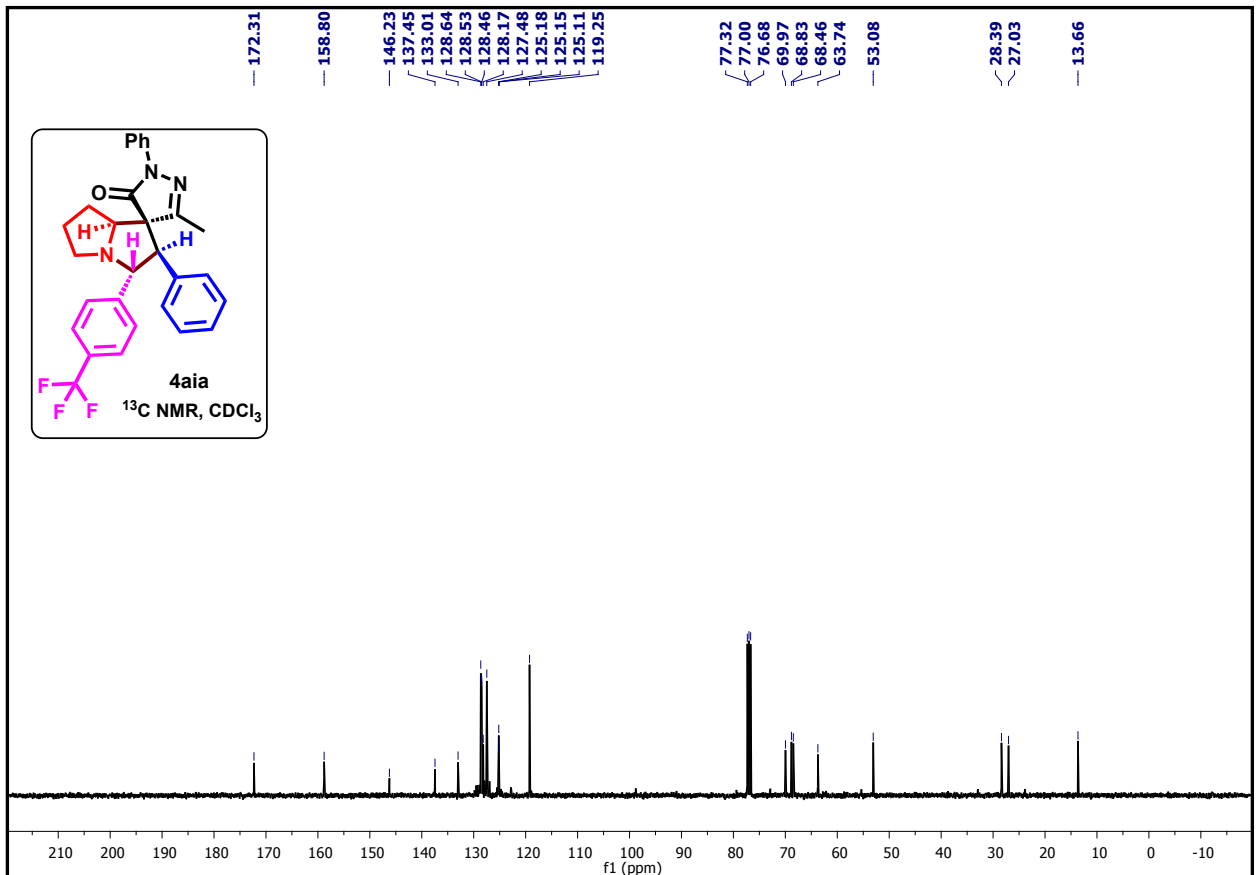

### <sup>1</sup>H NMR spectra of 4aja

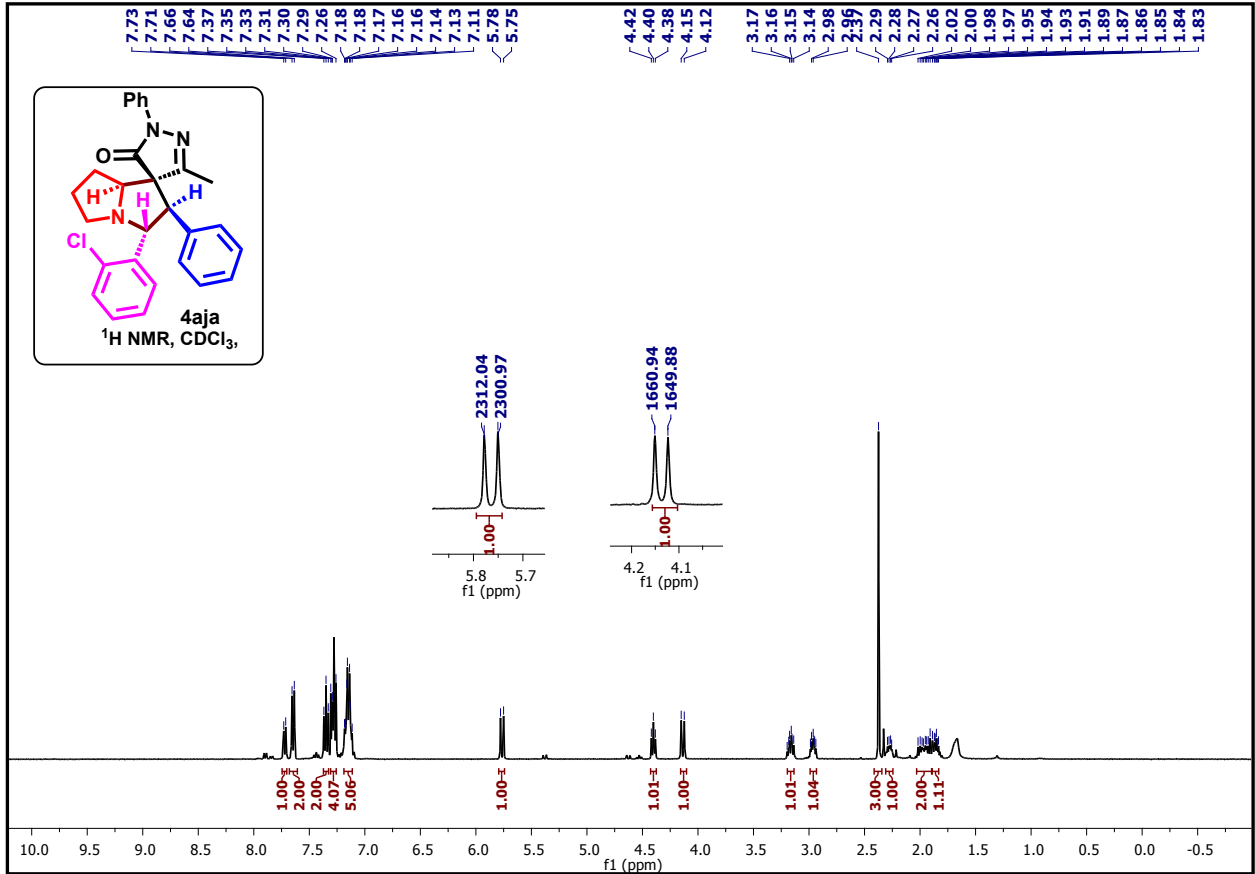

### <sup>13</sup>C NMR spectra of 4aja

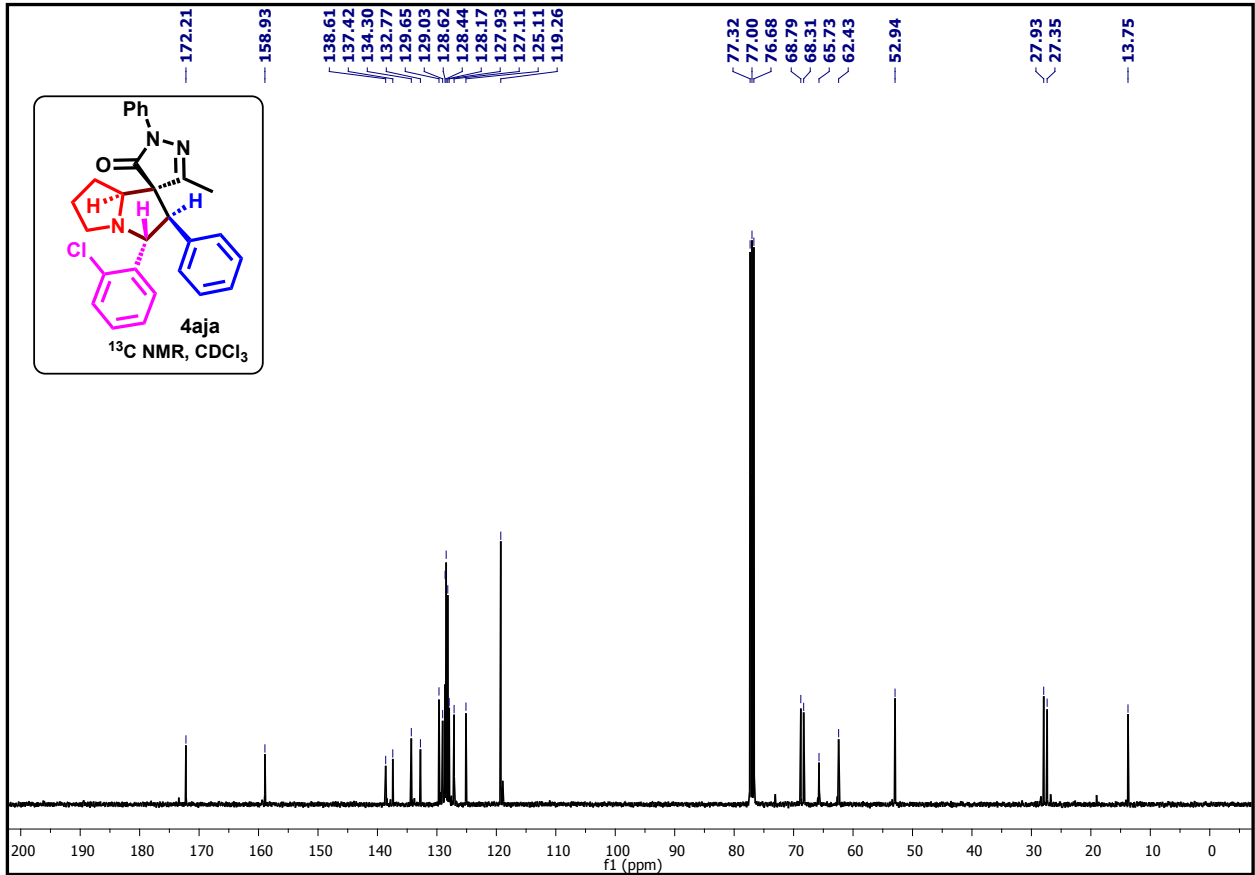

### <sup>1</sup>H NMR spectra of 4aka

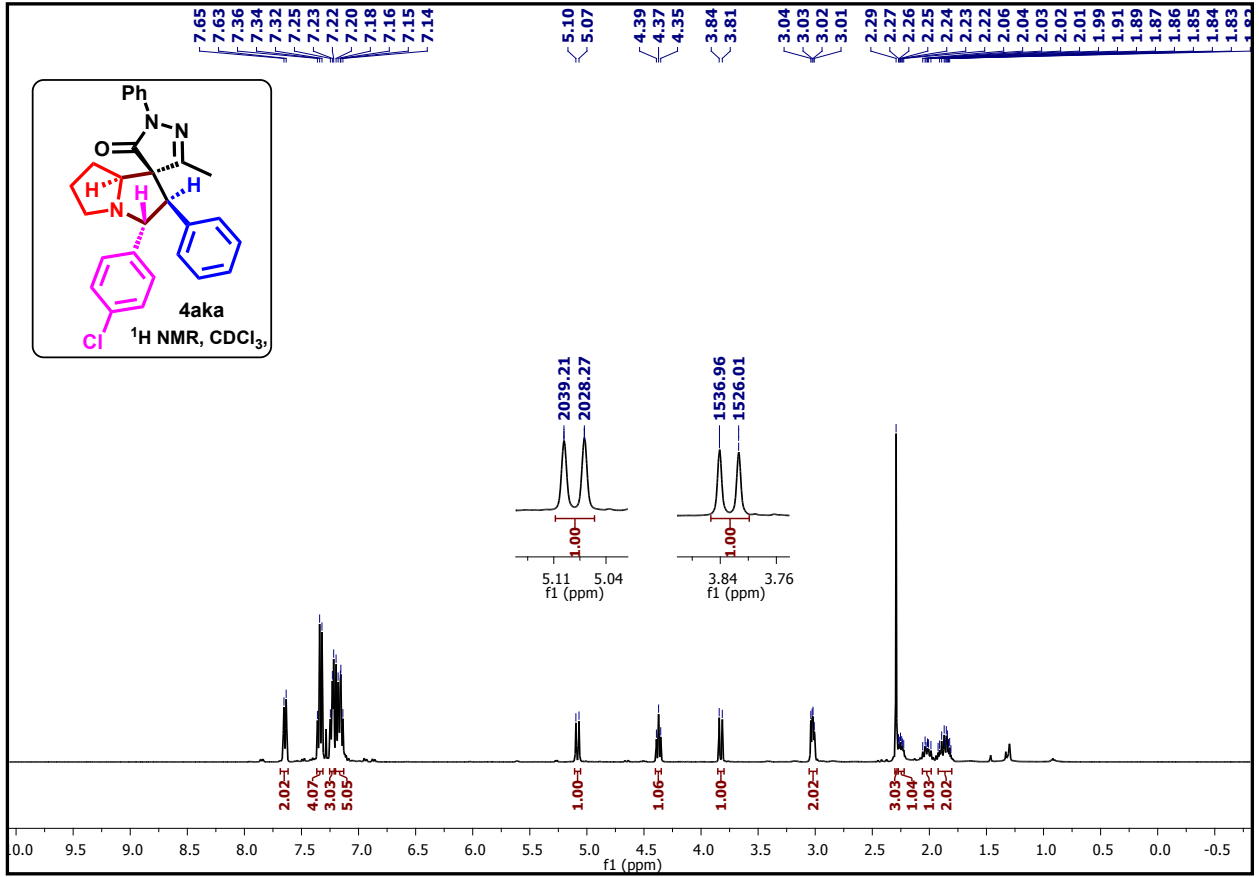

### <sup>13</sup>C NMR spectra of 4aka

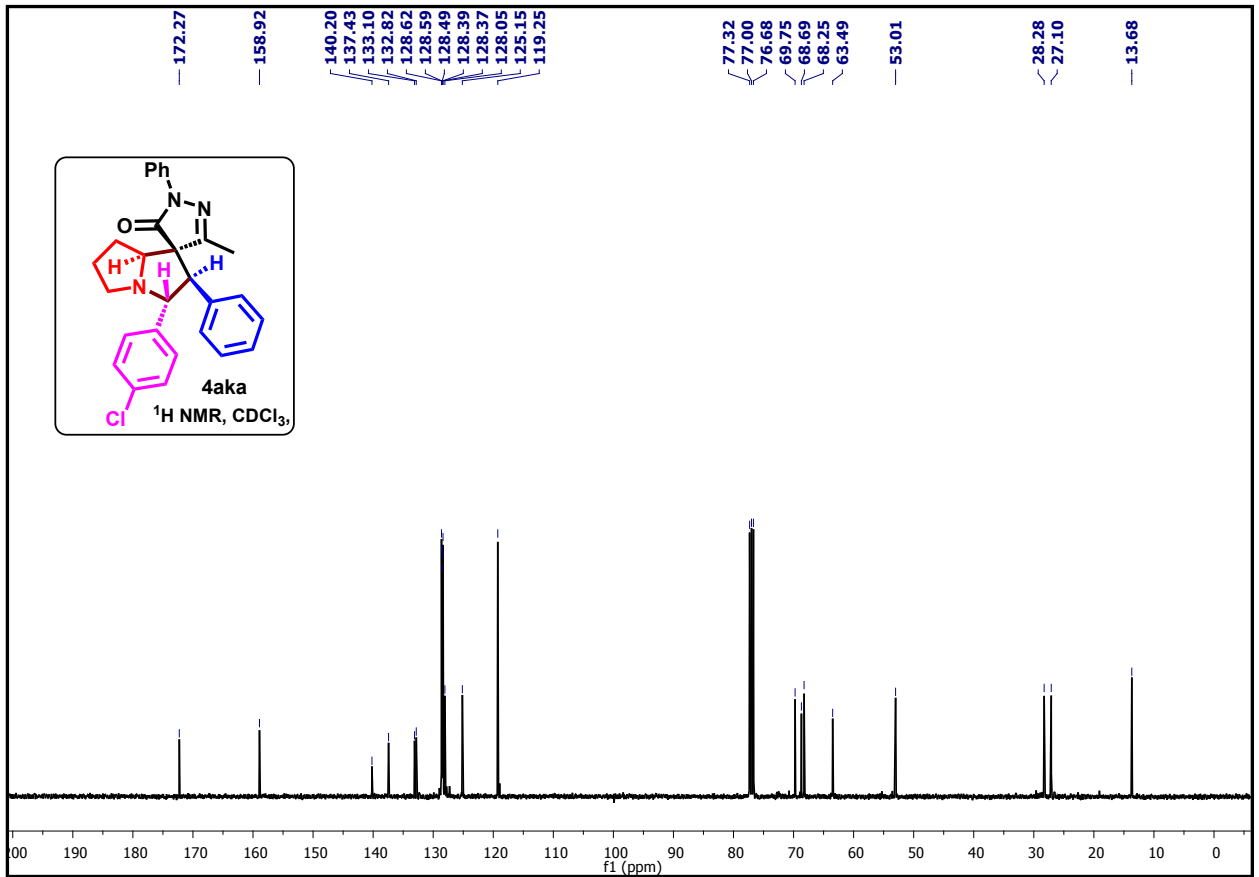

### <sup>1</sup>H NMR spectra of 4ala

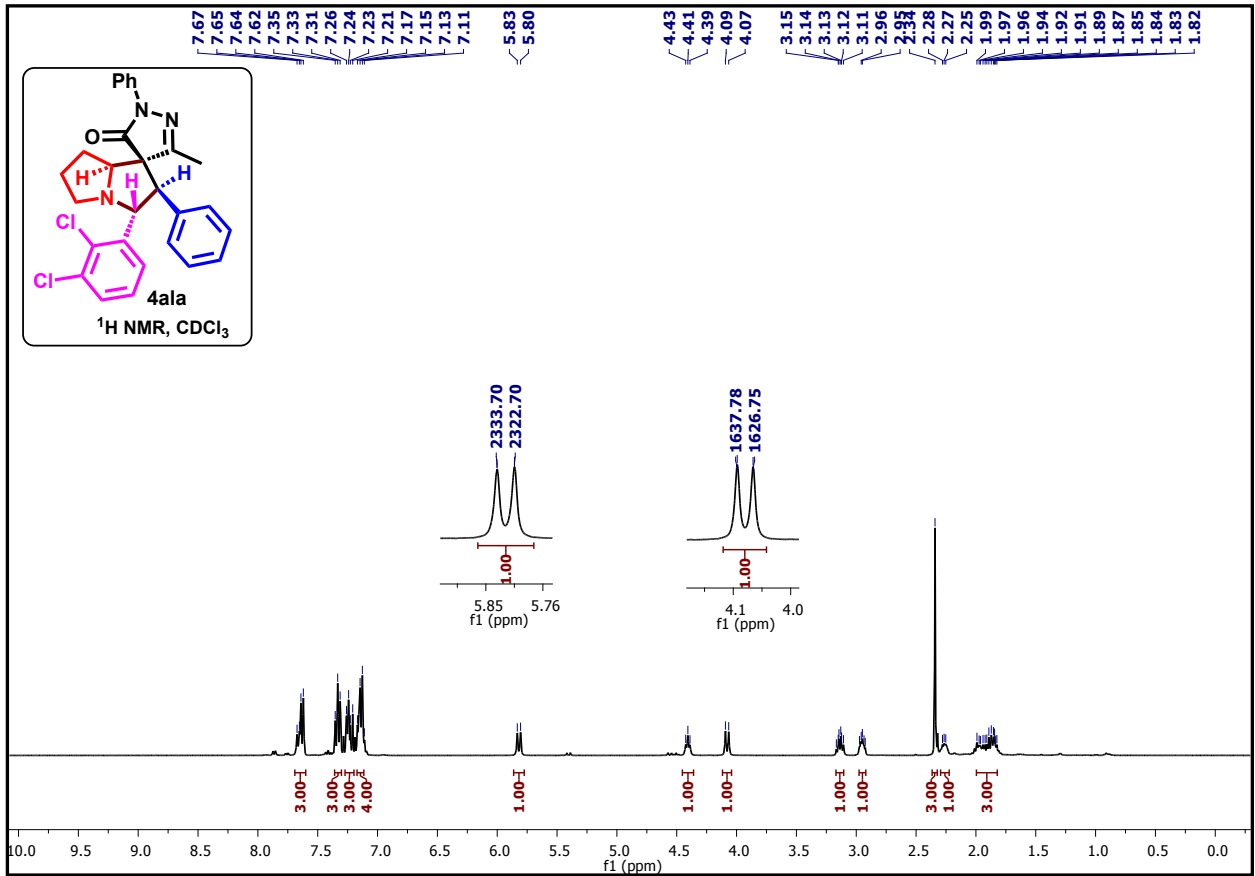

### <sup>13</sup>C NMR spectra of 4ala

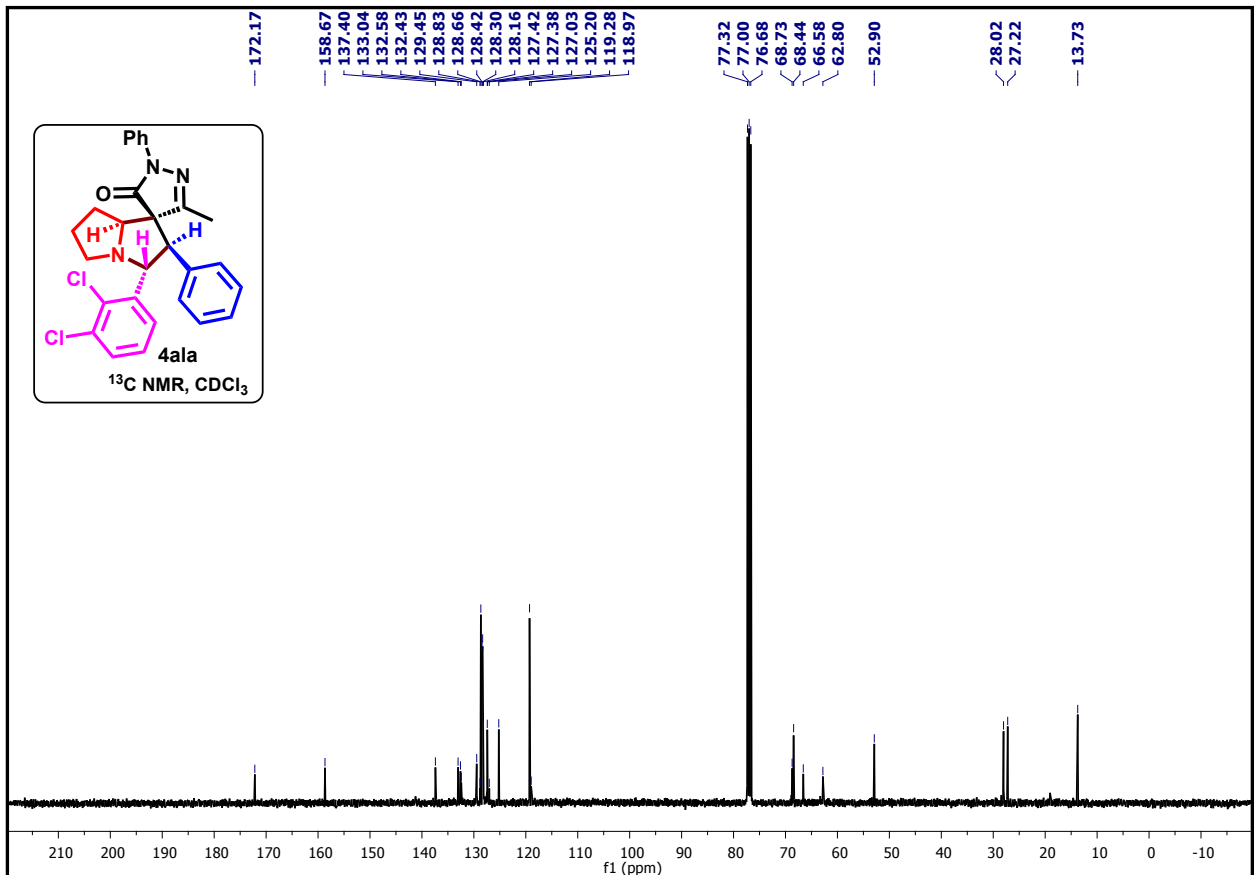

### <sup>1</sup>H NMR spectra of 4ama

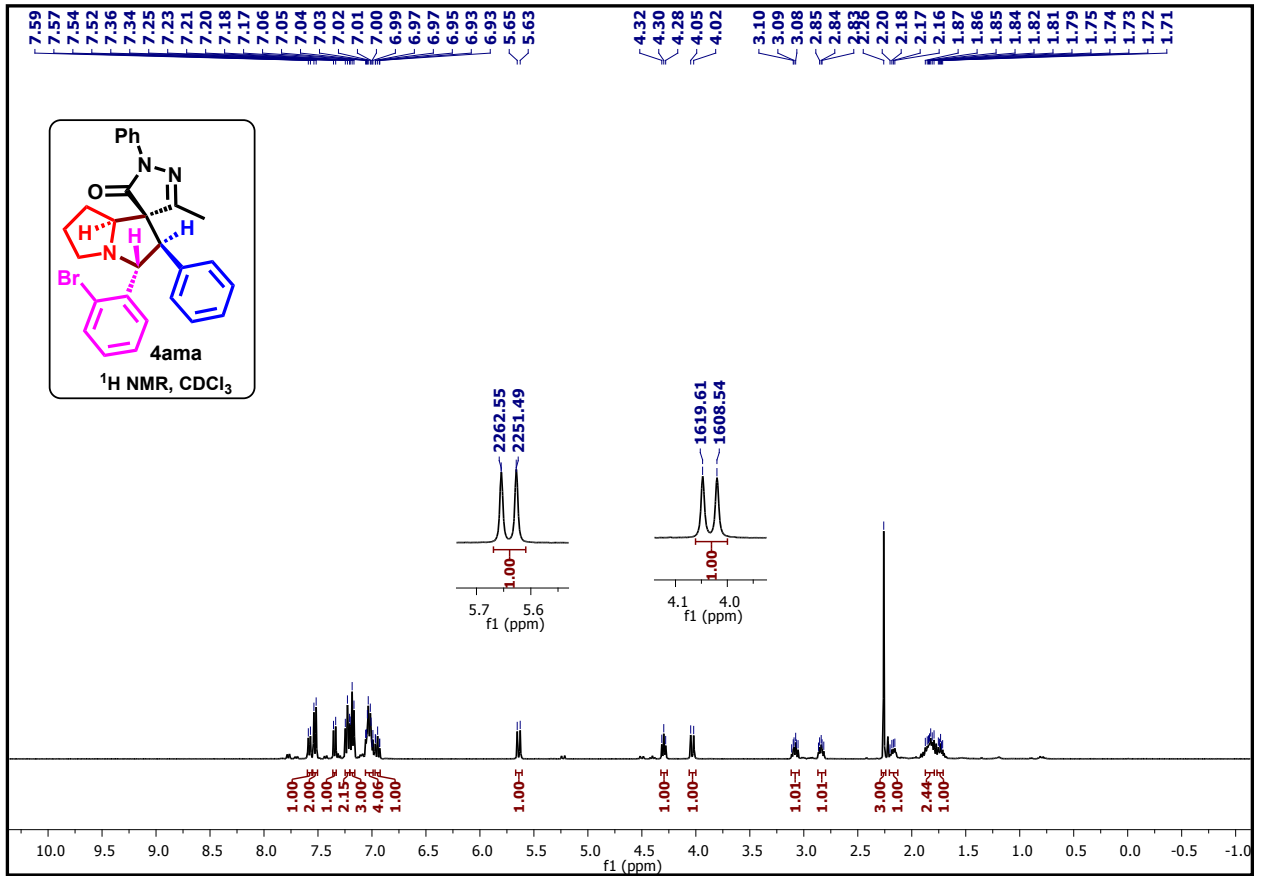

### <sup>13</sup>C NMR spectra of 4ama

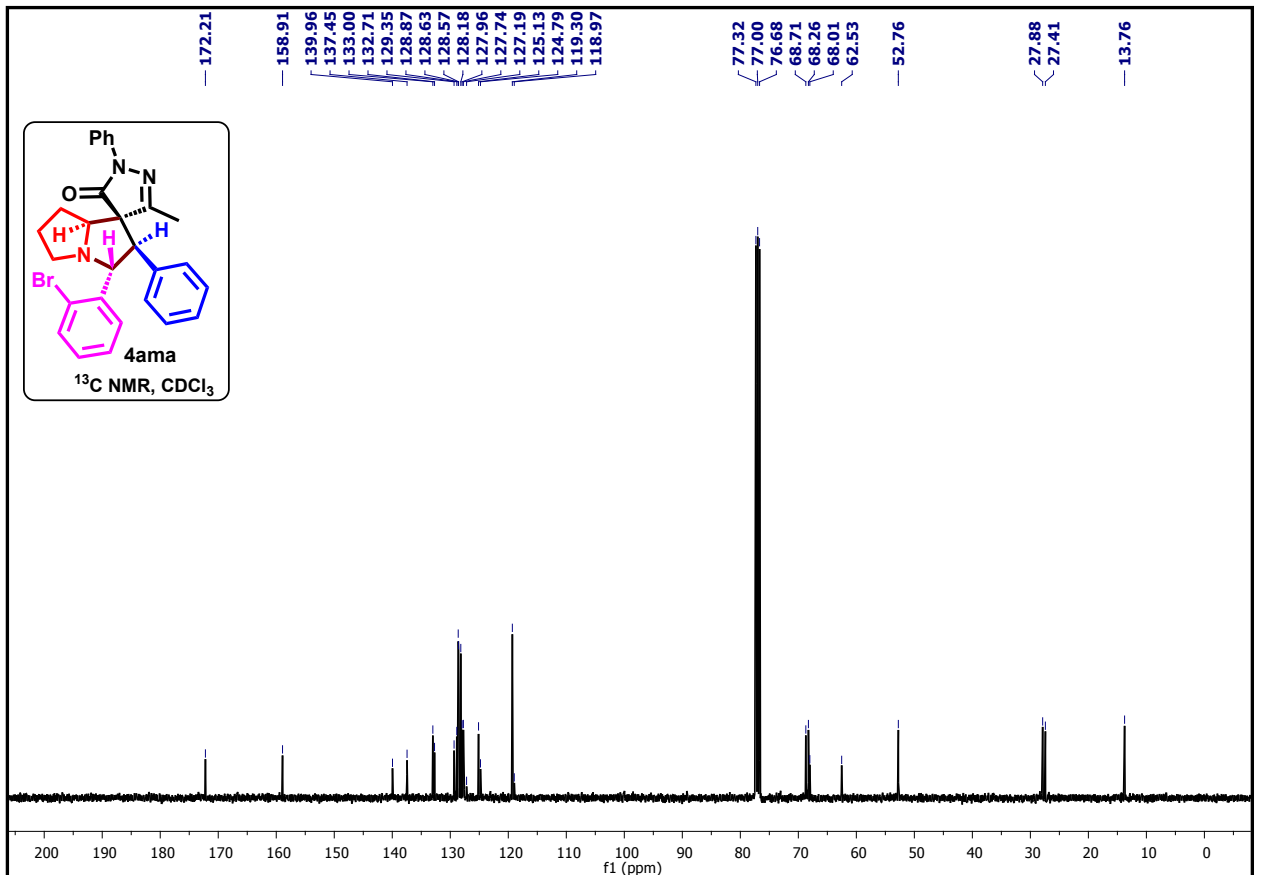

### <sup>1</sup>H NMR spectra of 4ana

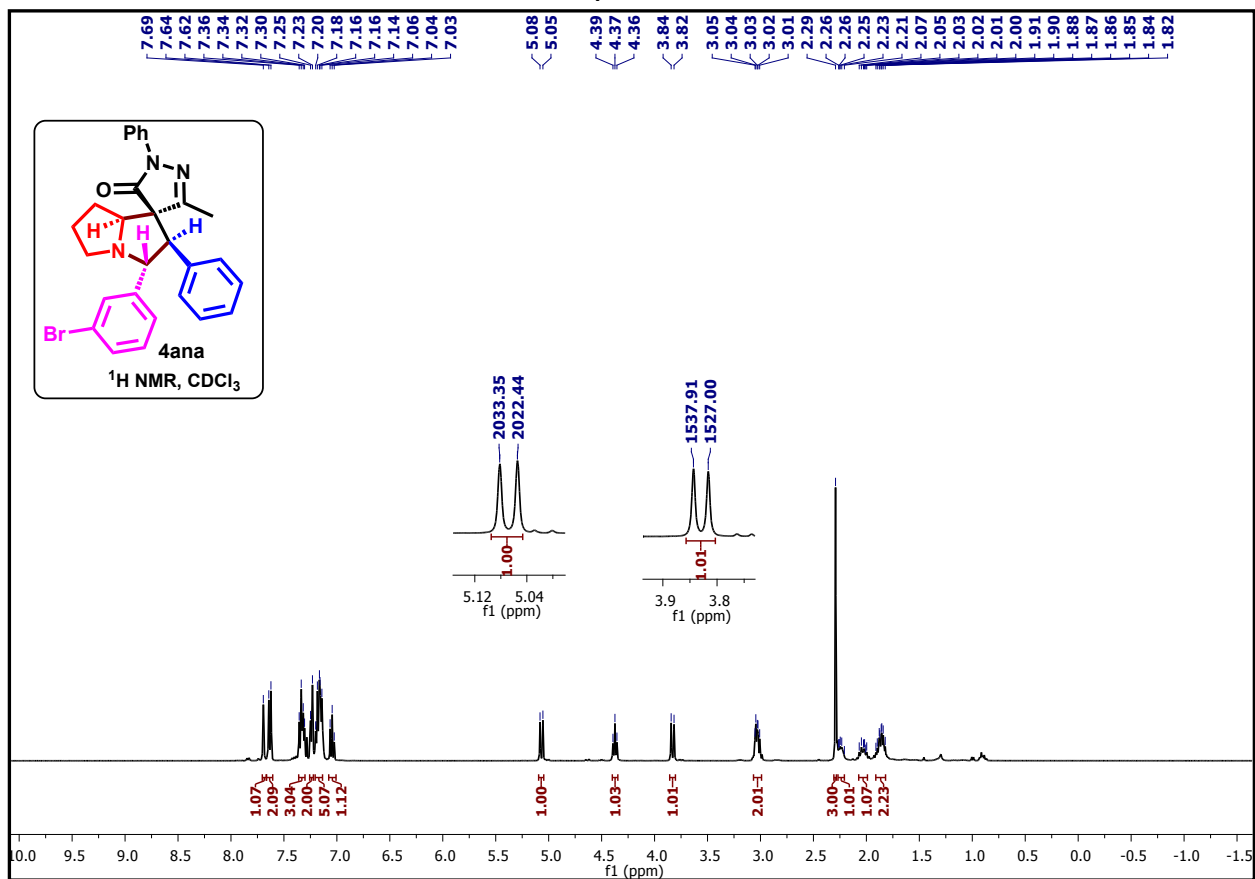

### <sup>13</sup>C NMR spectra of 4ana

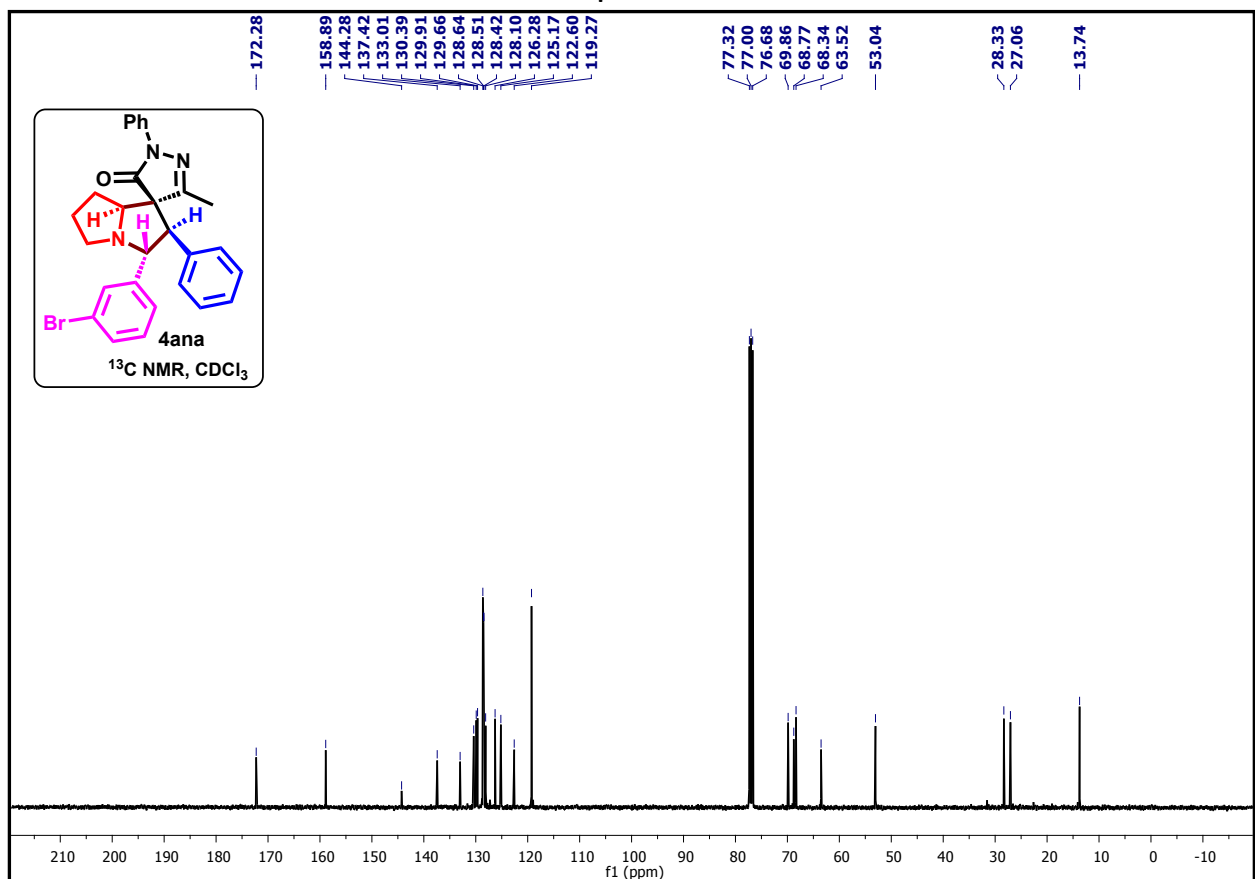

### <sup>1</sup>H NMR spectra of 4aoa

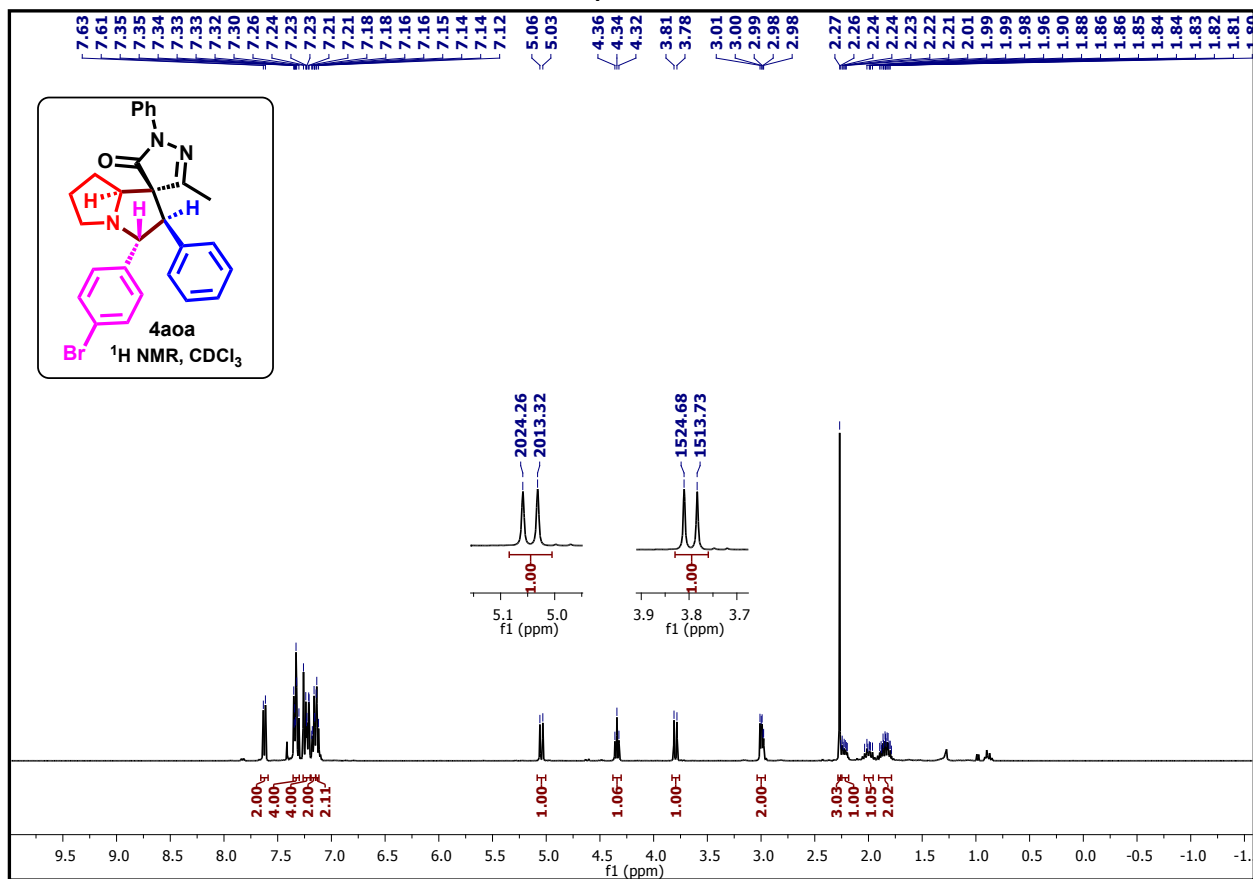

### <sup>13</sup>C NMR spectra of 4aoa

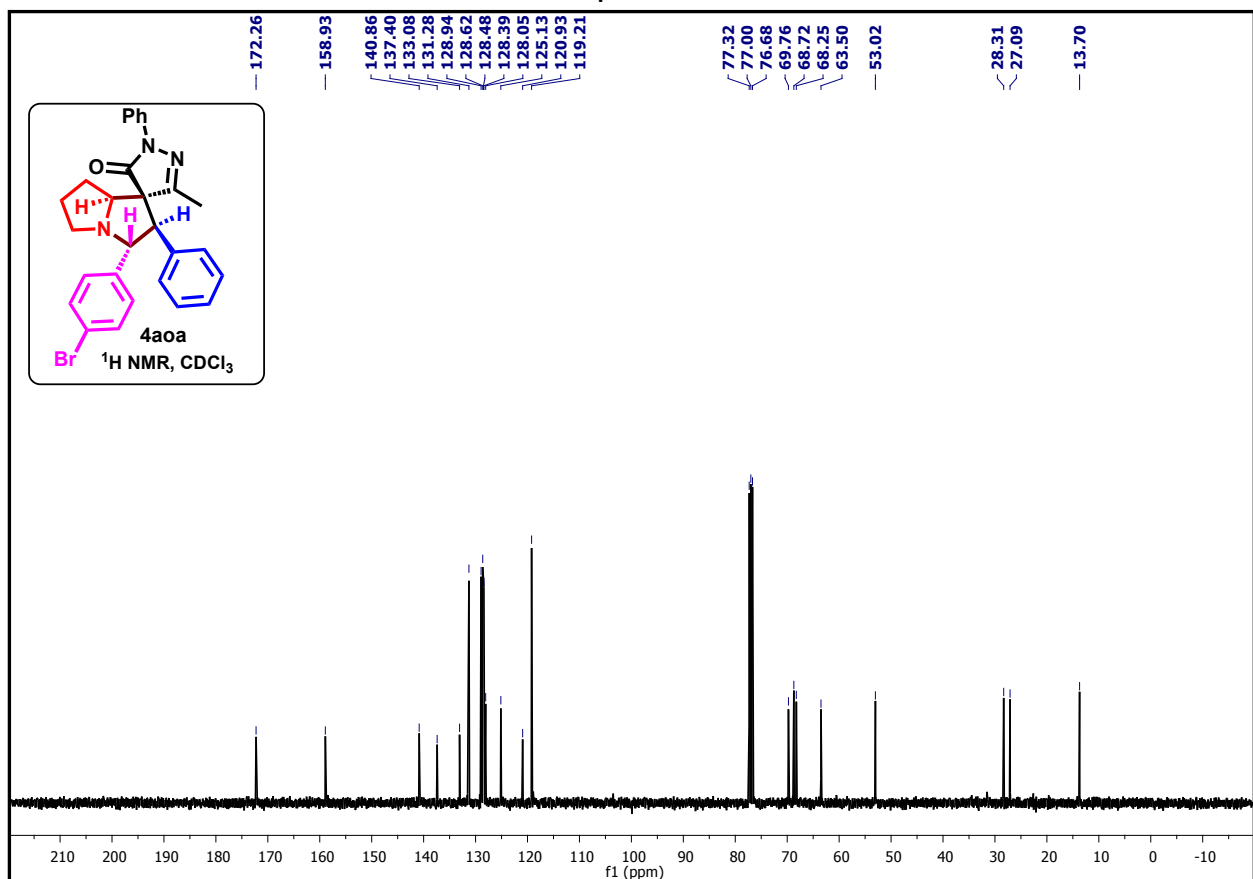



### <sup>1</sup>H NMR spectra of 4apa

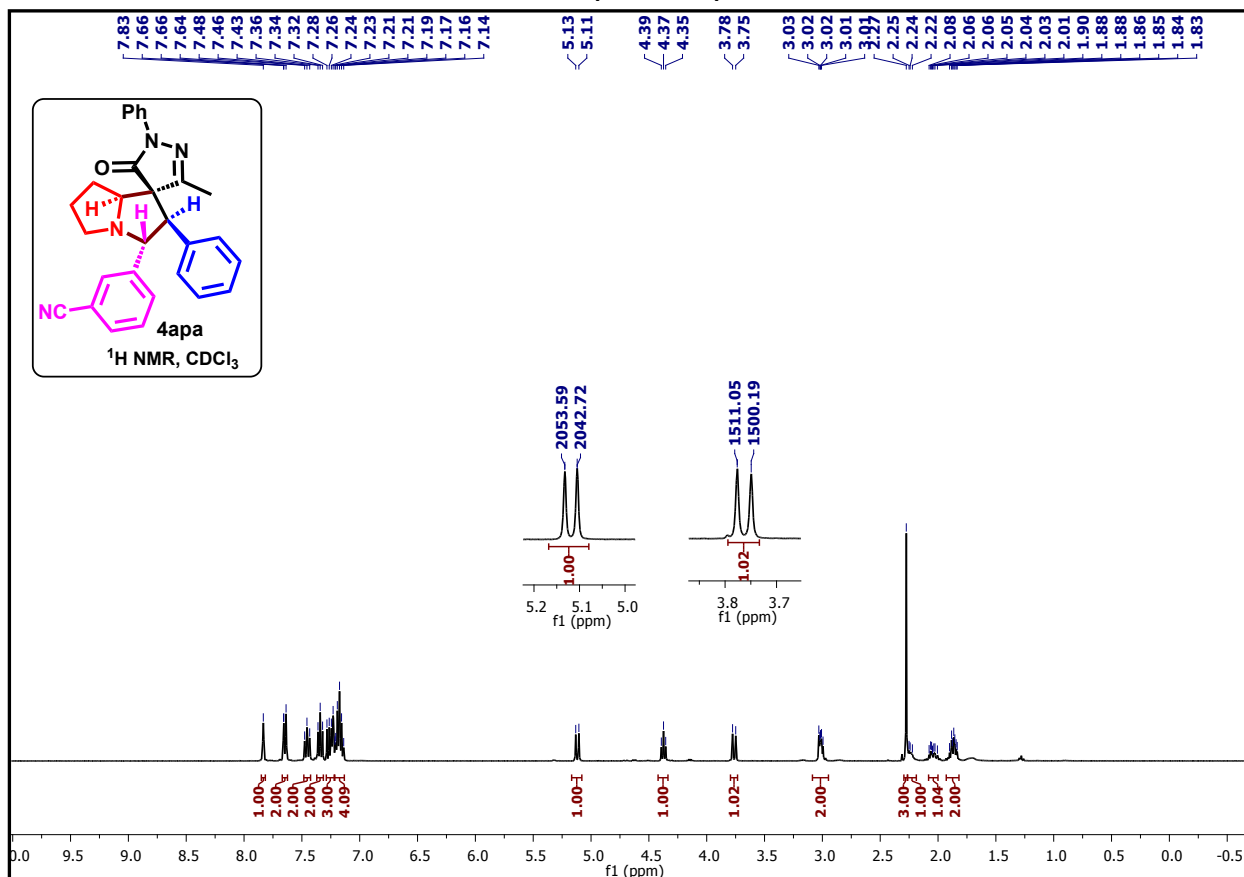

### <sup>13</sup>C NMR spectra of 4apa

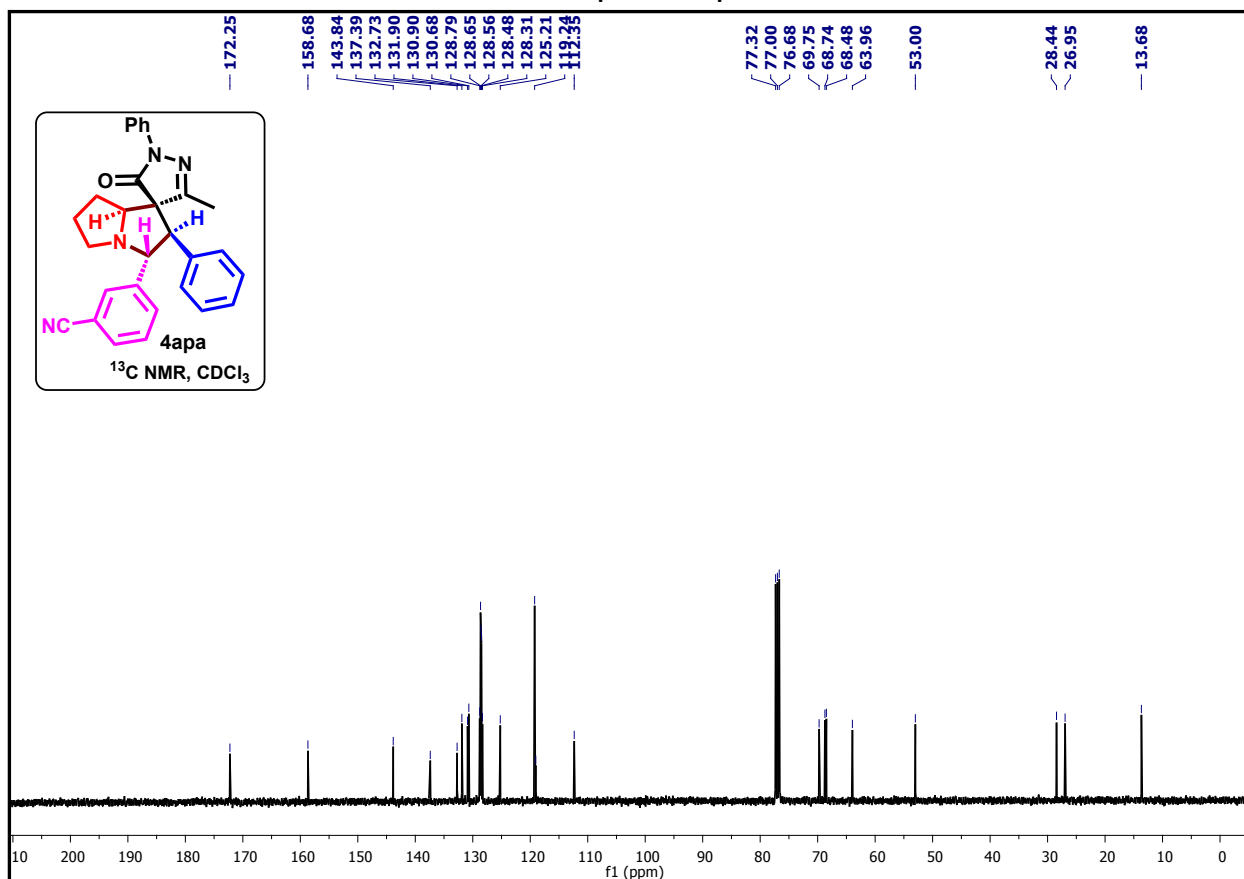

### <sup>1</sup>H NMR spectra of 4aqa

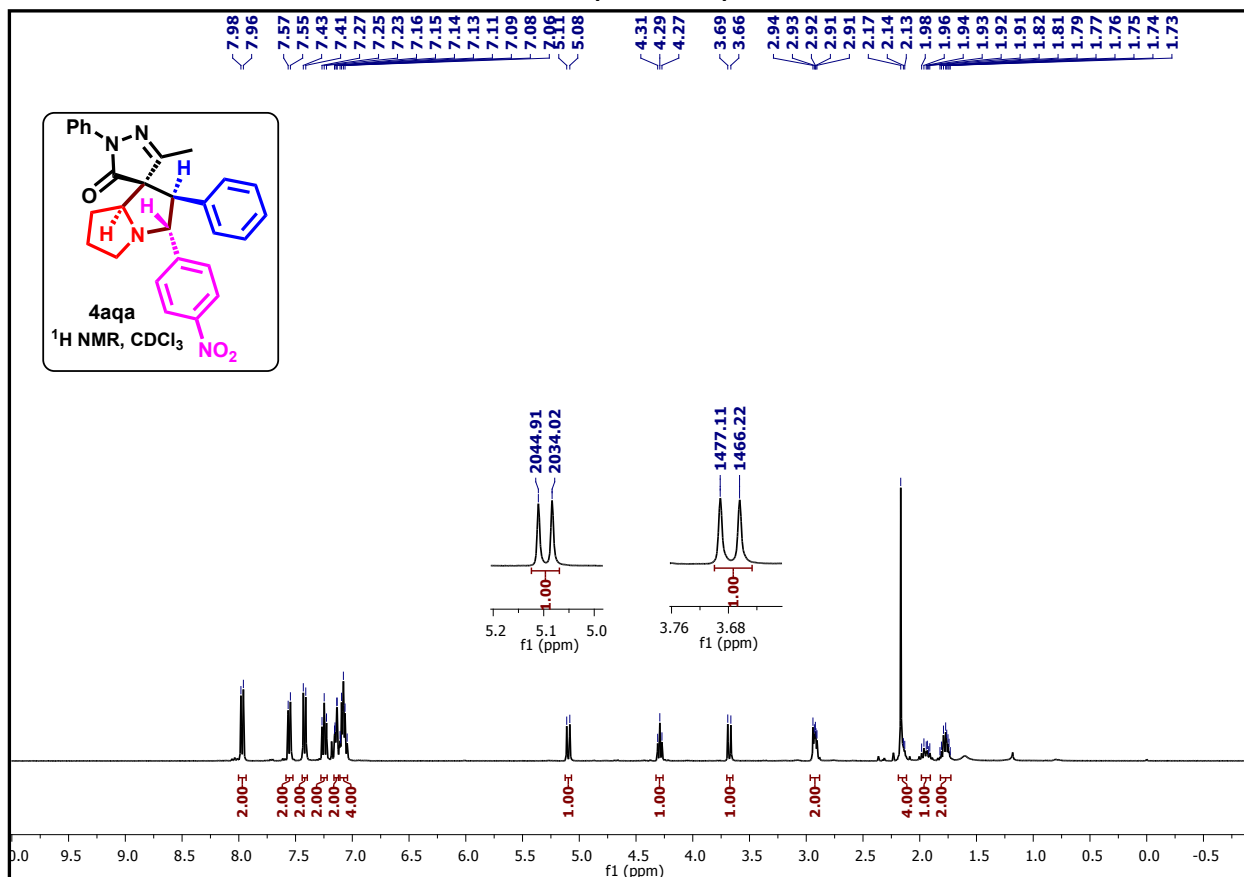

### <sup>13</sup>C NMR spectra of 4aqa

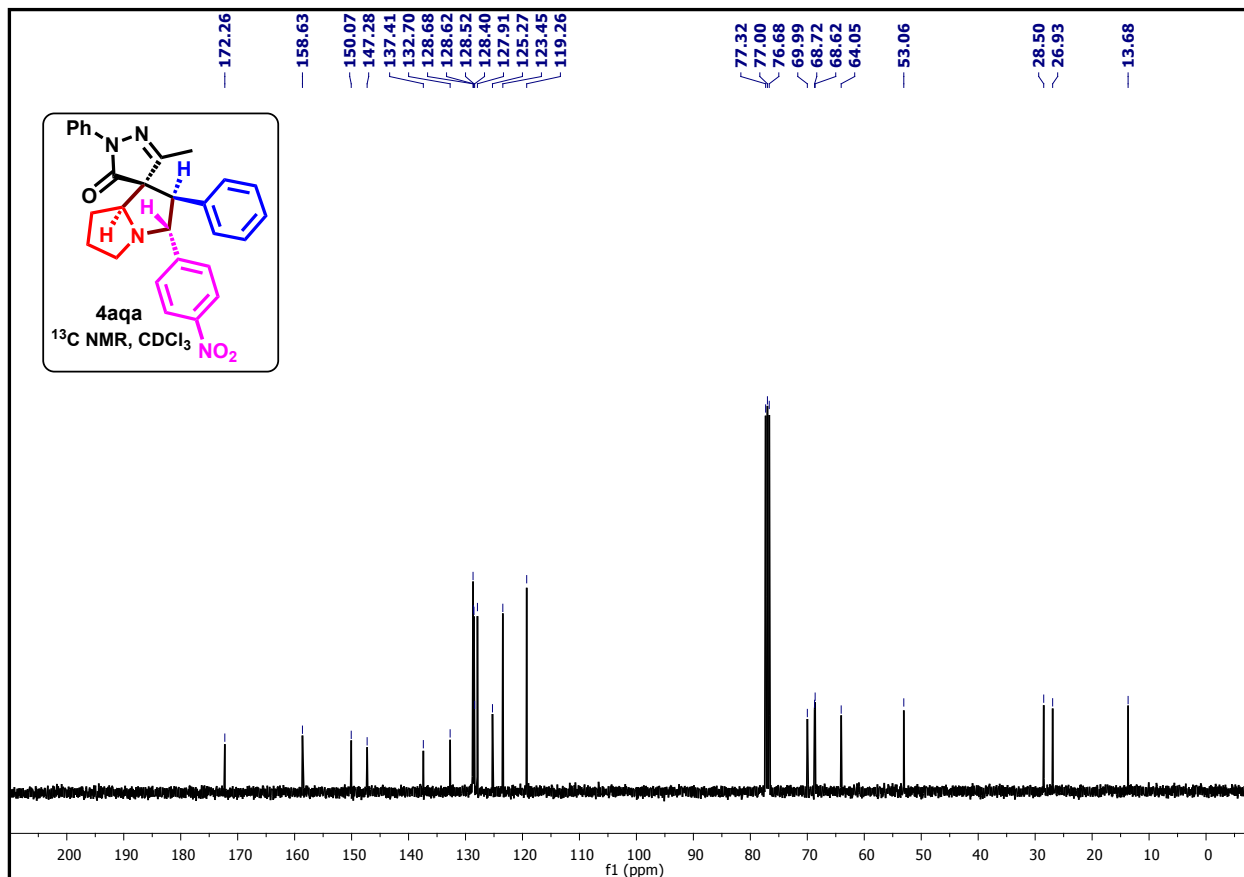

### <sup>1</sup>H NMR spectra of 4ara

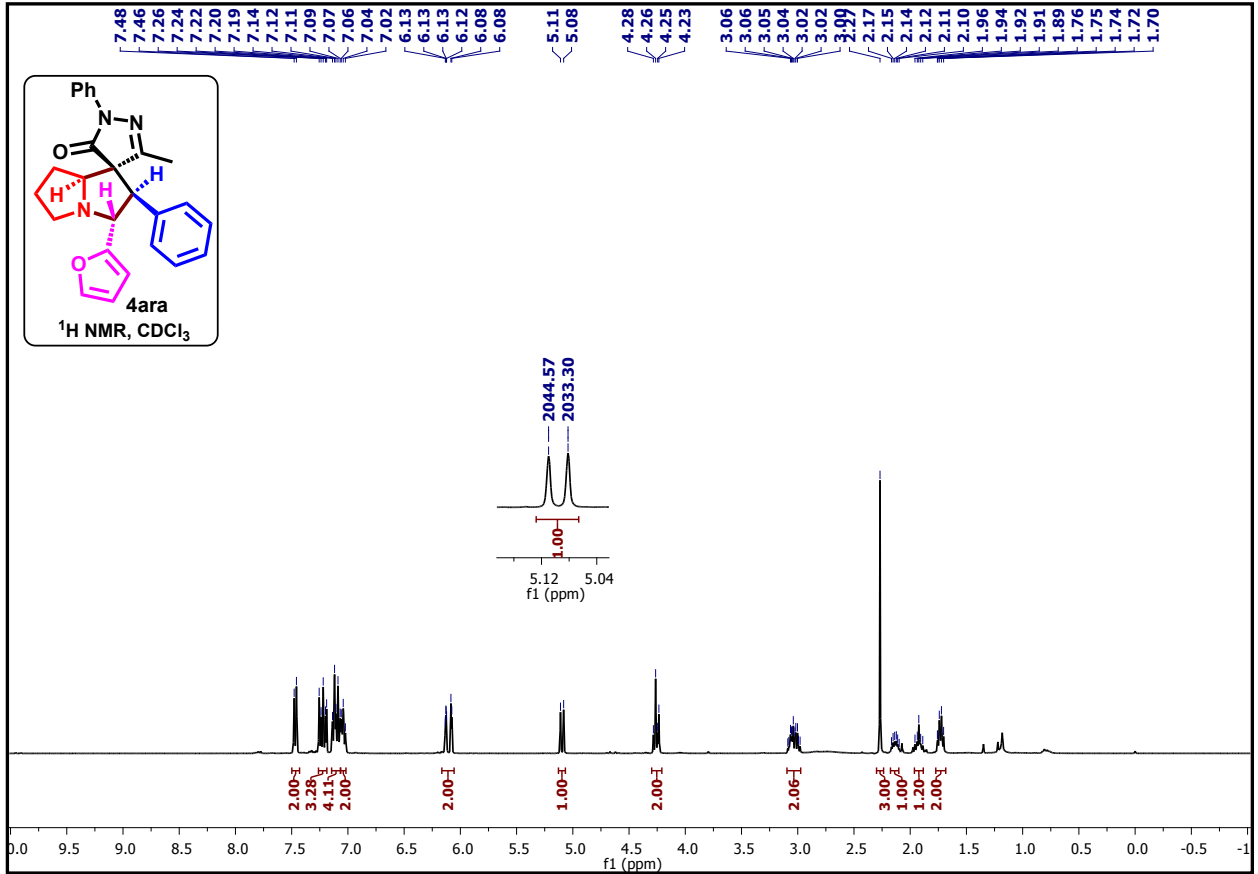

### <sup>13</sup>C NMR spectra of 4ara

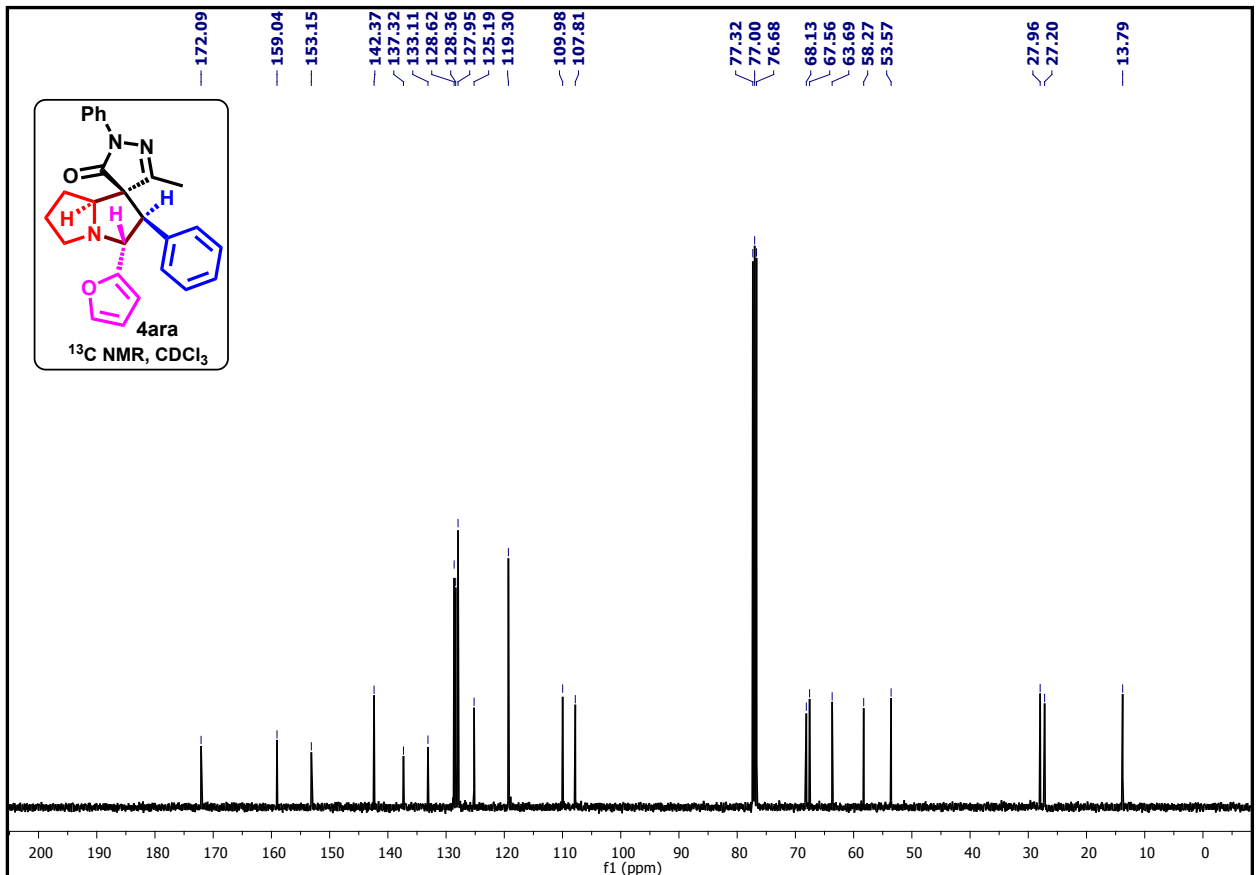

### <sup>1</sup>H NMR spectra of 4asa

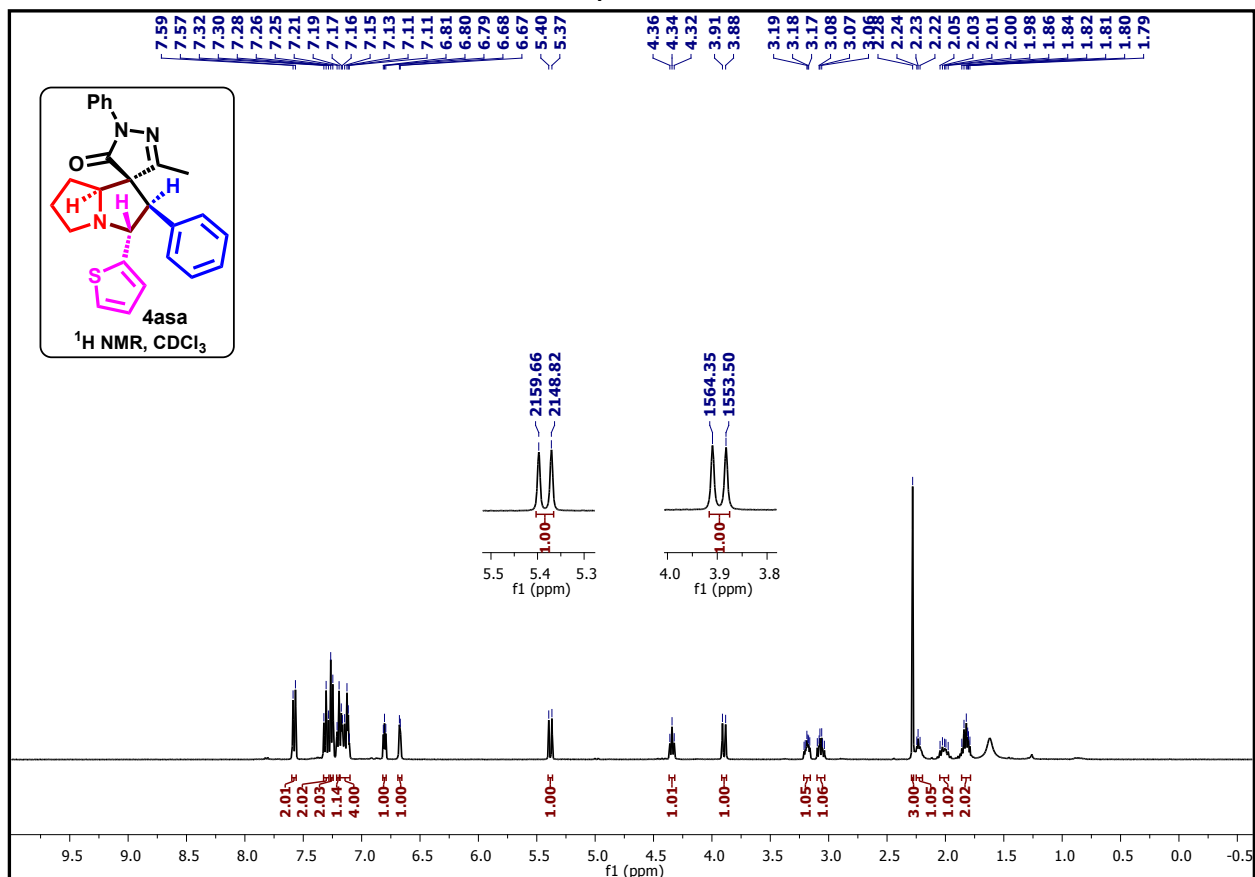

### <sup>13</sup>C NMR spectra of 4asa

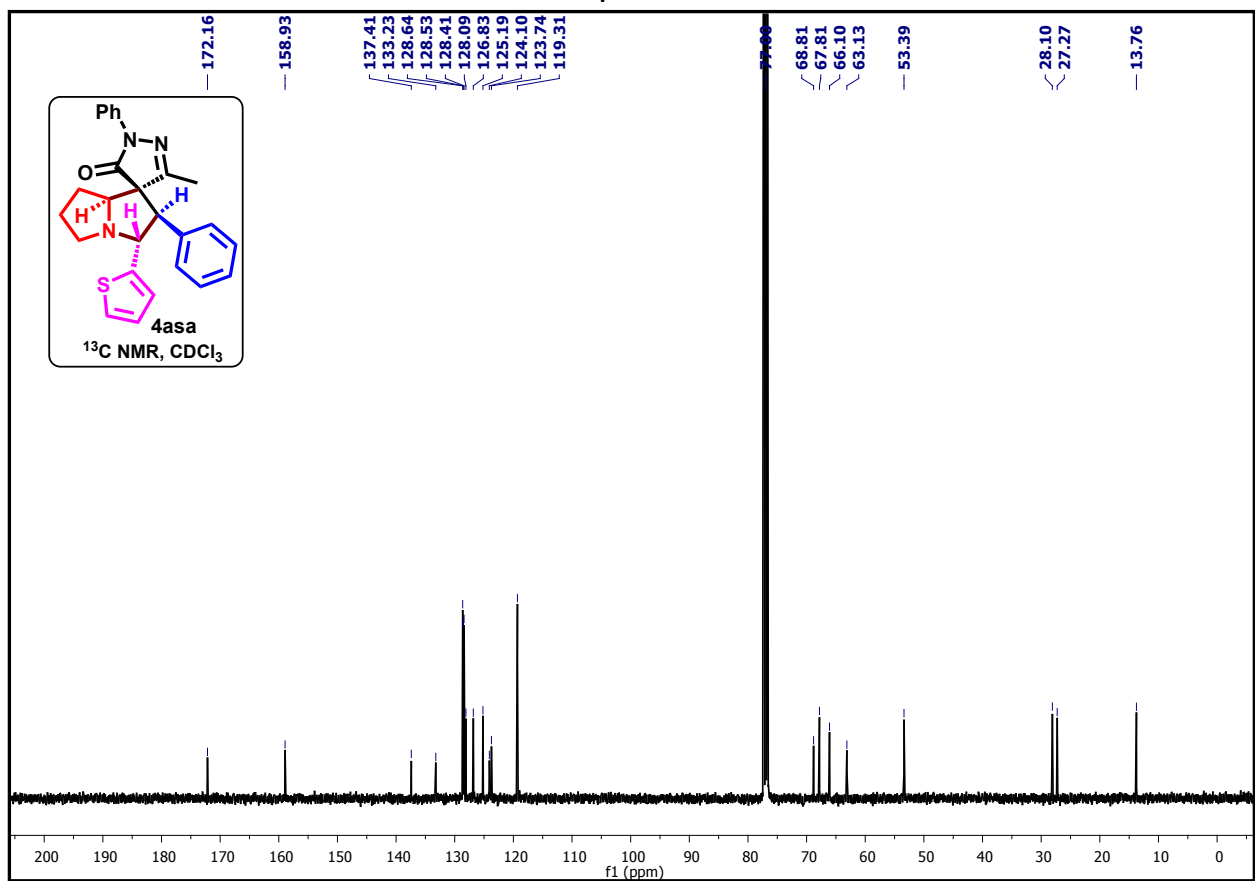

### <sup>1</sup>H NMR spectra of 4ata

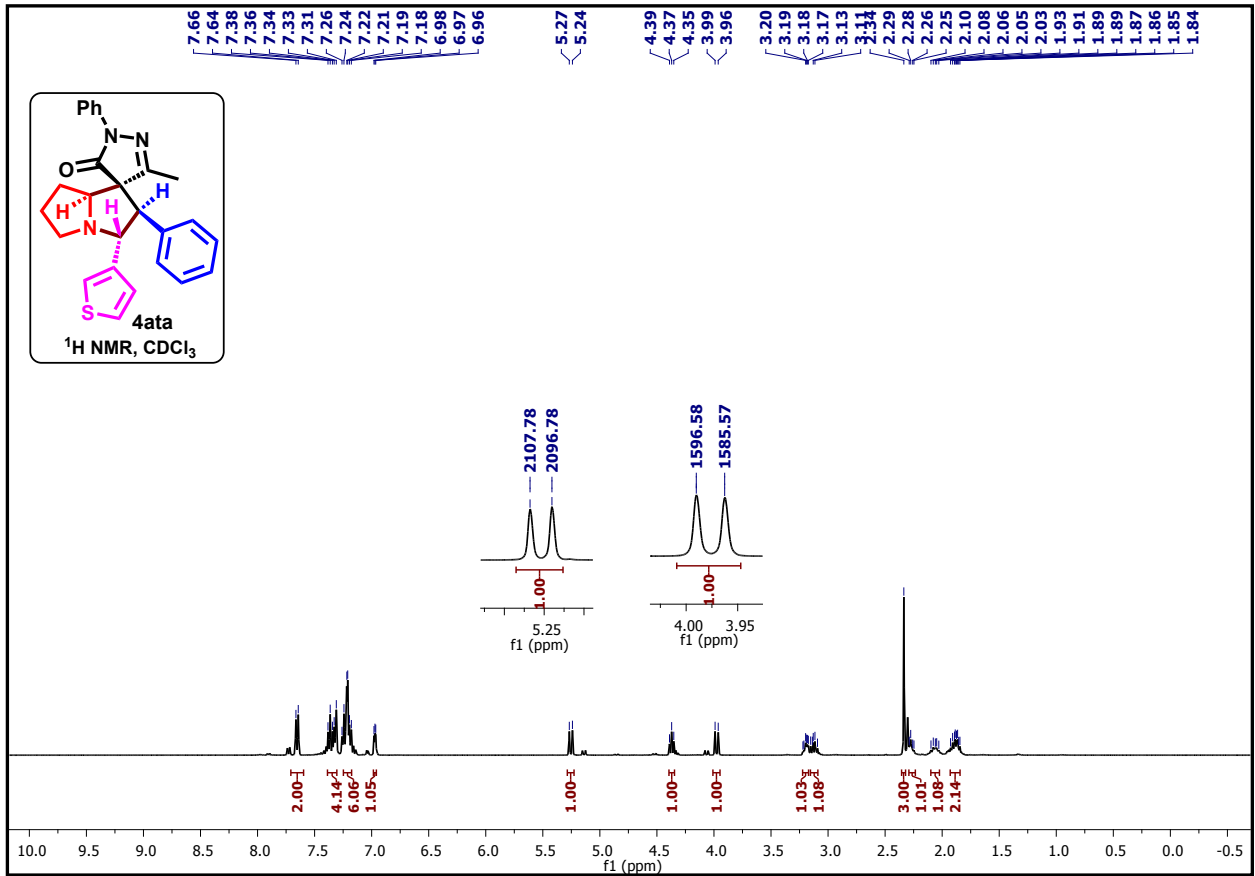

### <sup>13</sup>C NMR spectra of 4ata

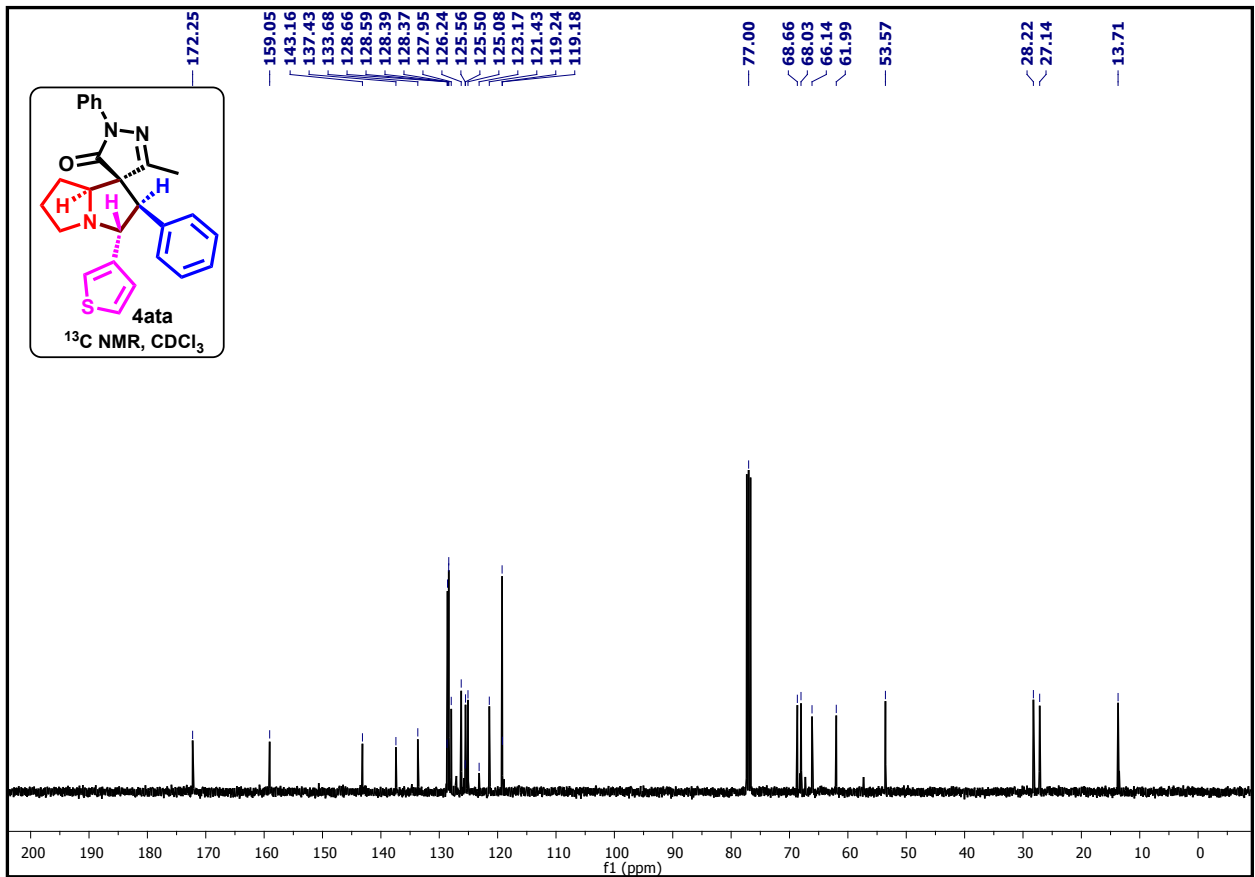

### <sup>1</sup>H NMR spectra of 4aua

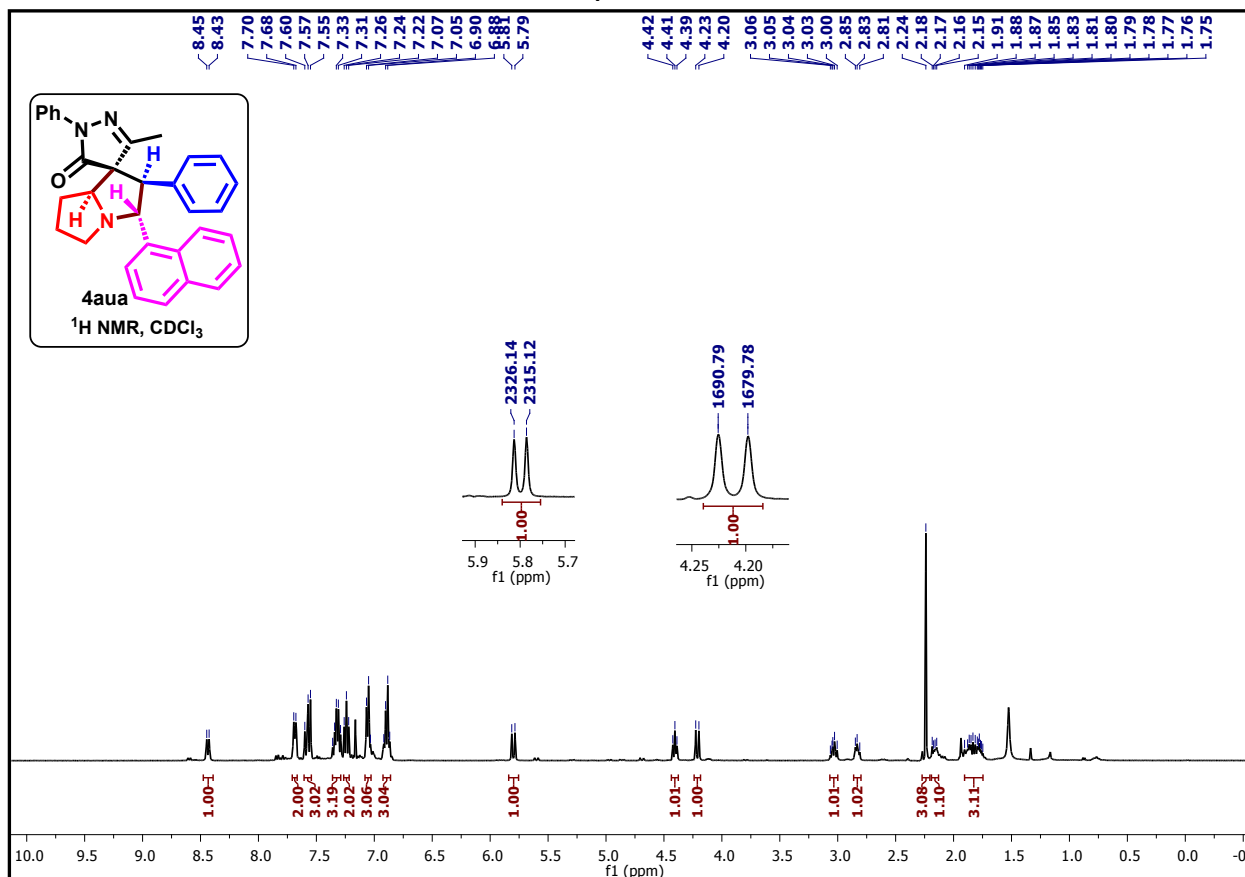

### <sup>13</sup>C NMR spectra of 4aua

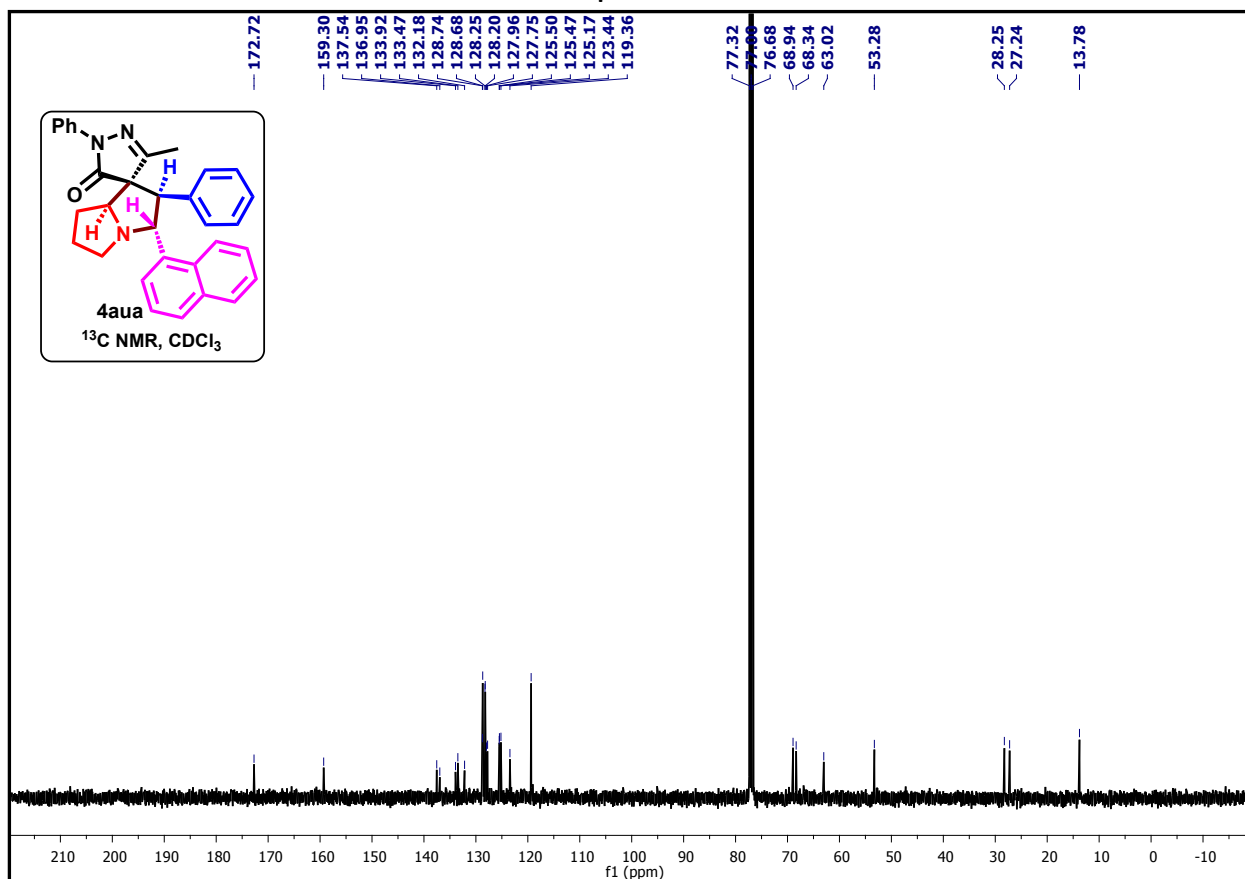

### <sup>1</sup>H NMR spectra of 4ava

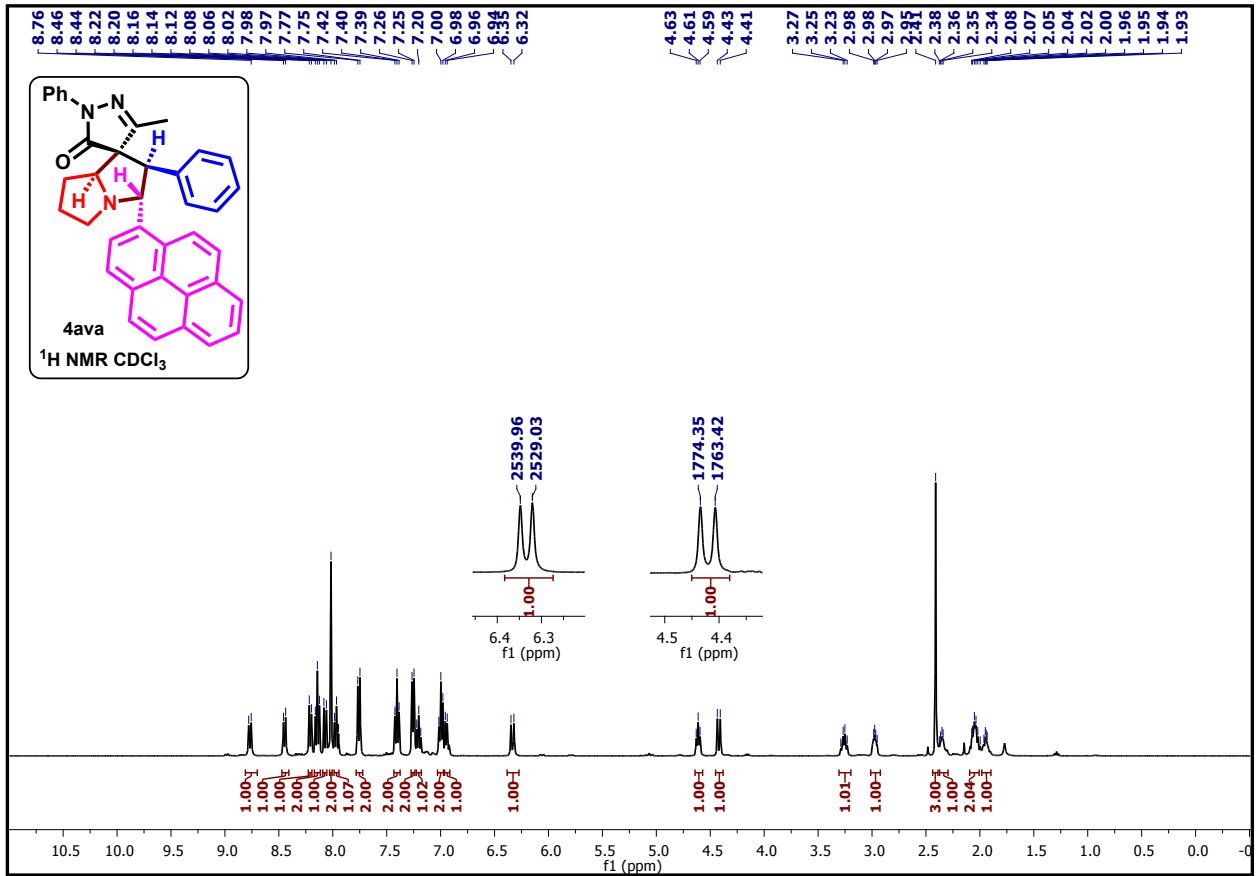

### <sup>13</sup>C NMR spectra of 4ava

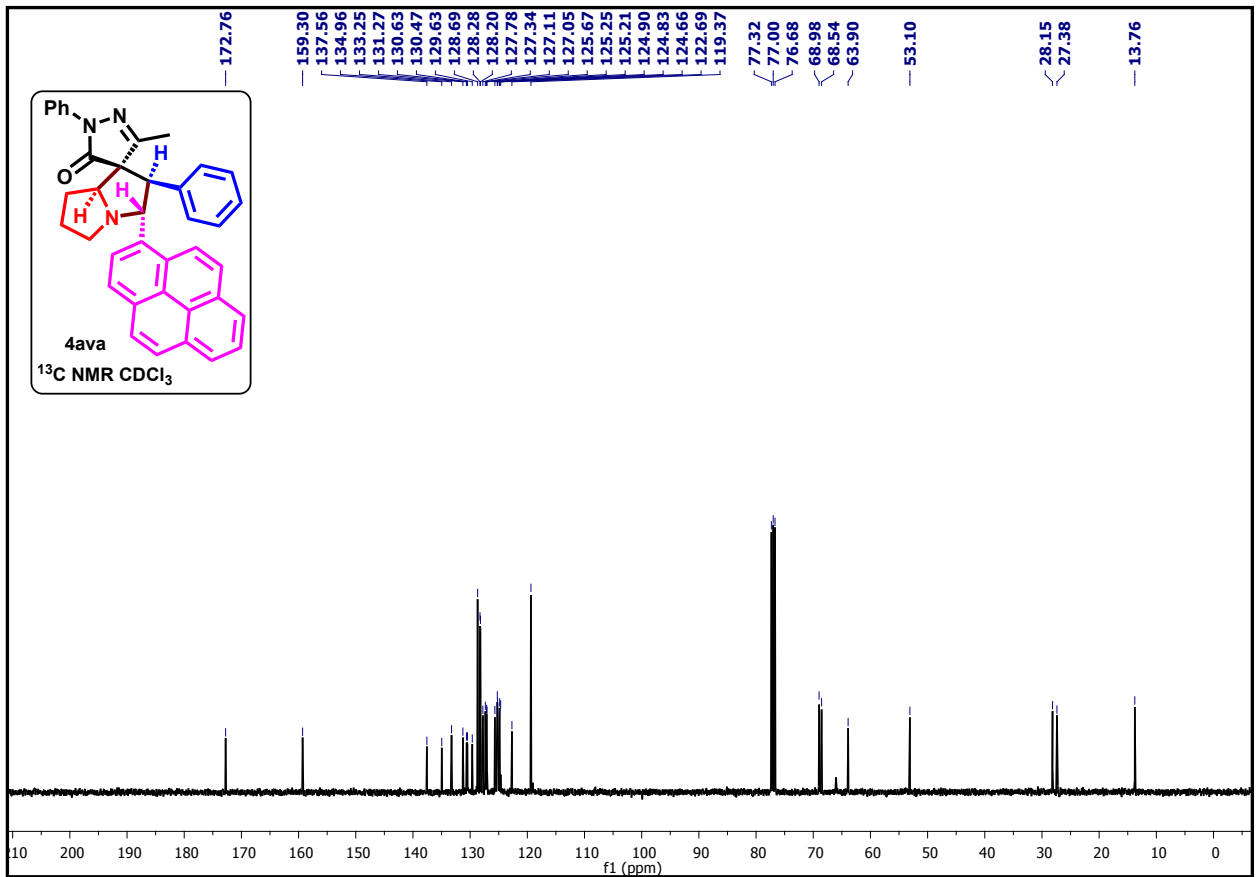

### <sup>1</sup>H NMR spectra of 4aab

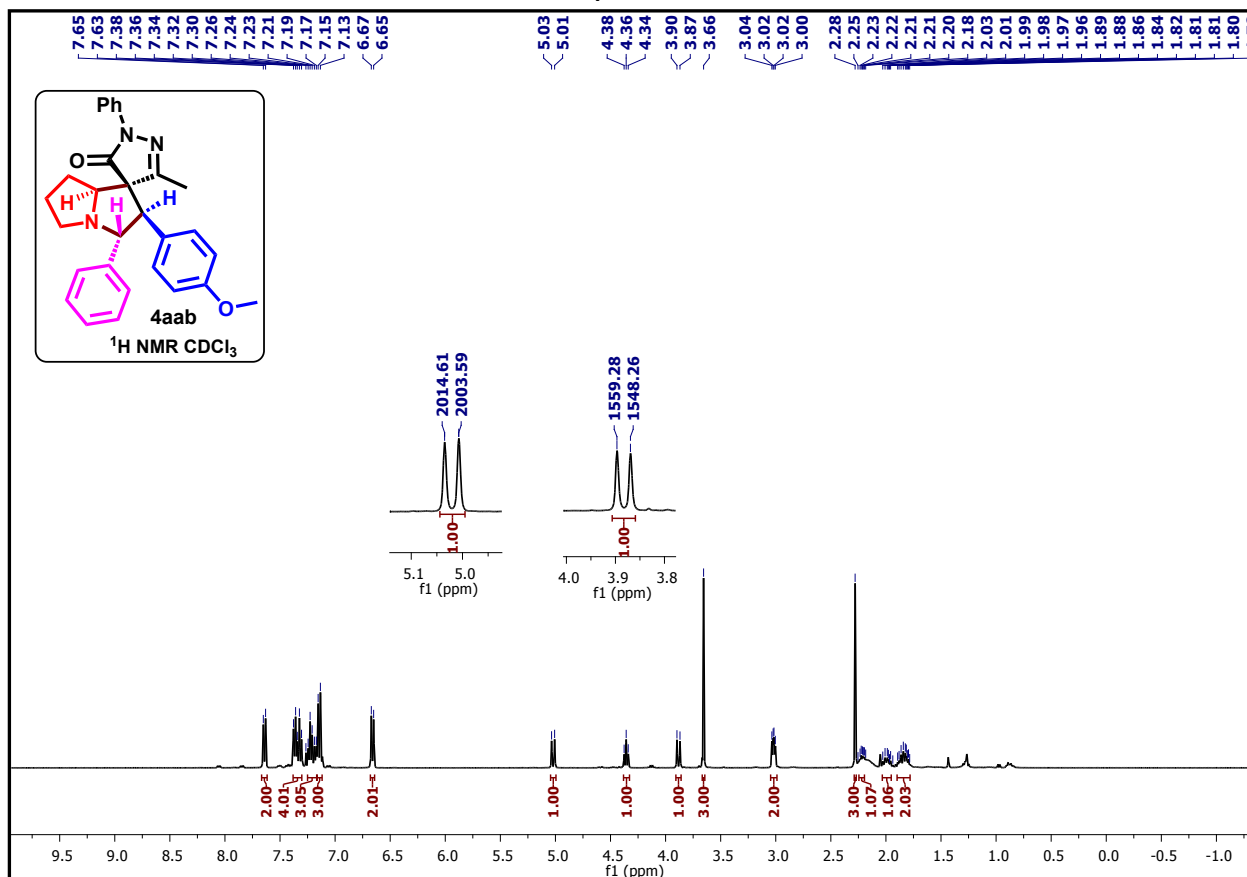

### <sup>13</sup>C NMR spectra of 4aab

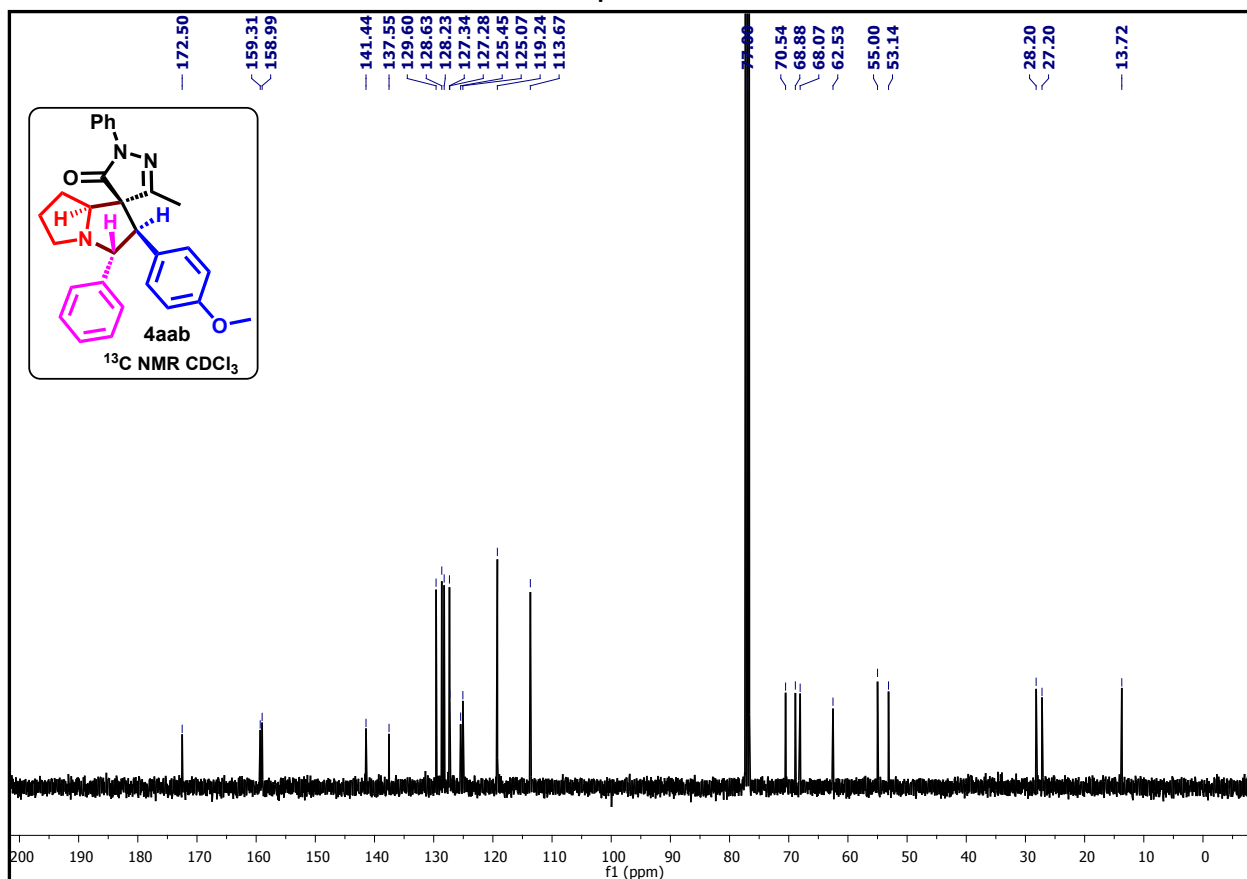



### $^1\text{H}$ NMR spectra of 4aac

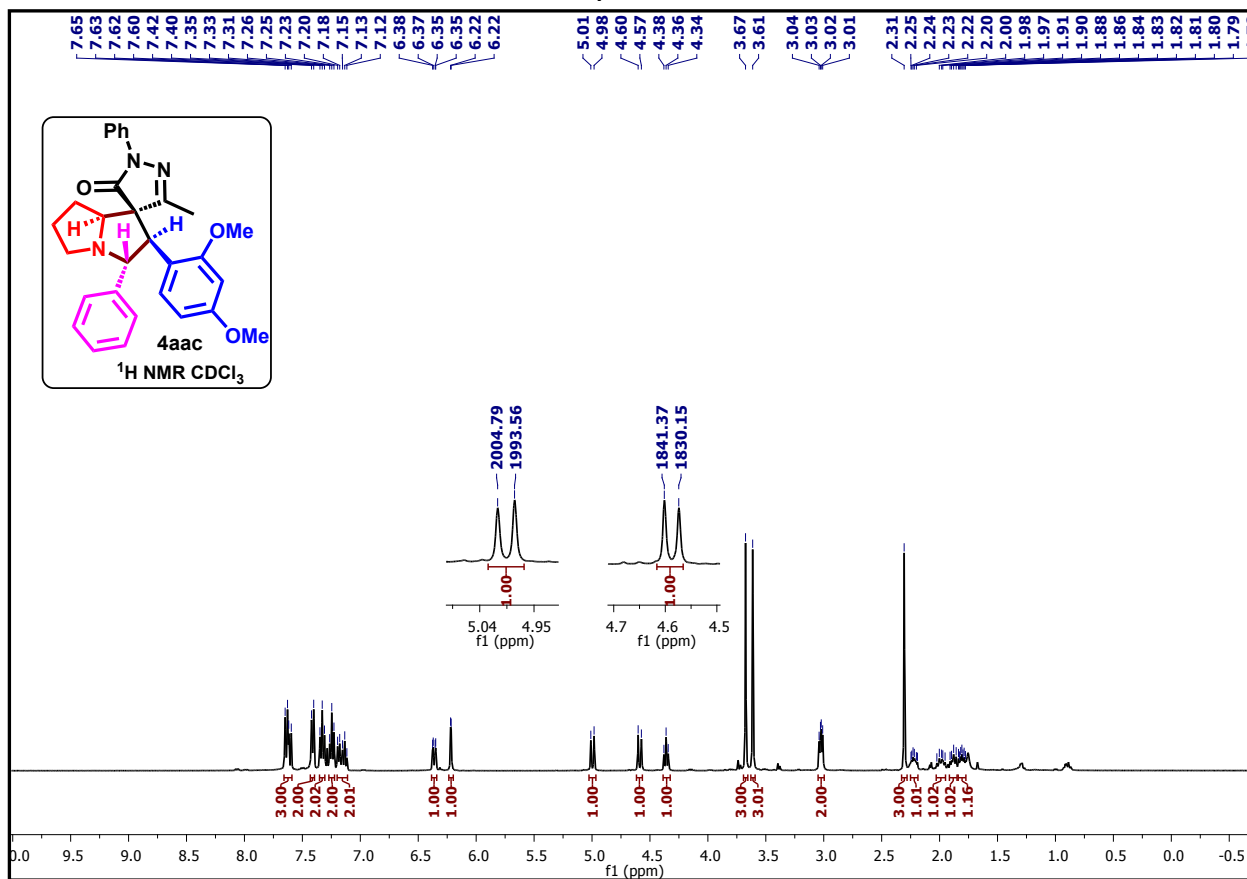

### $^{13}\text{C}$ NMR spectra of 4aac

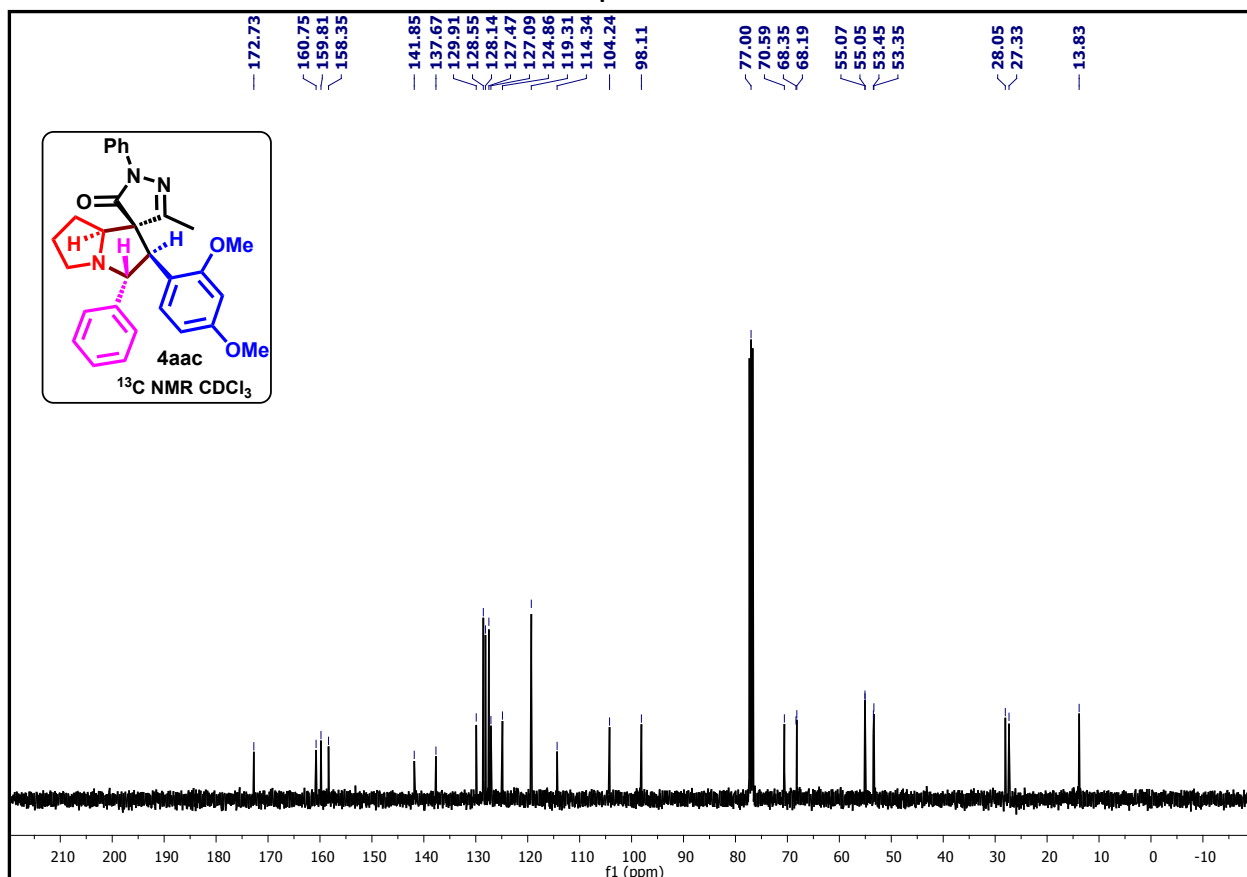

### <sup>1</sup>H NMR spectra of 4aad

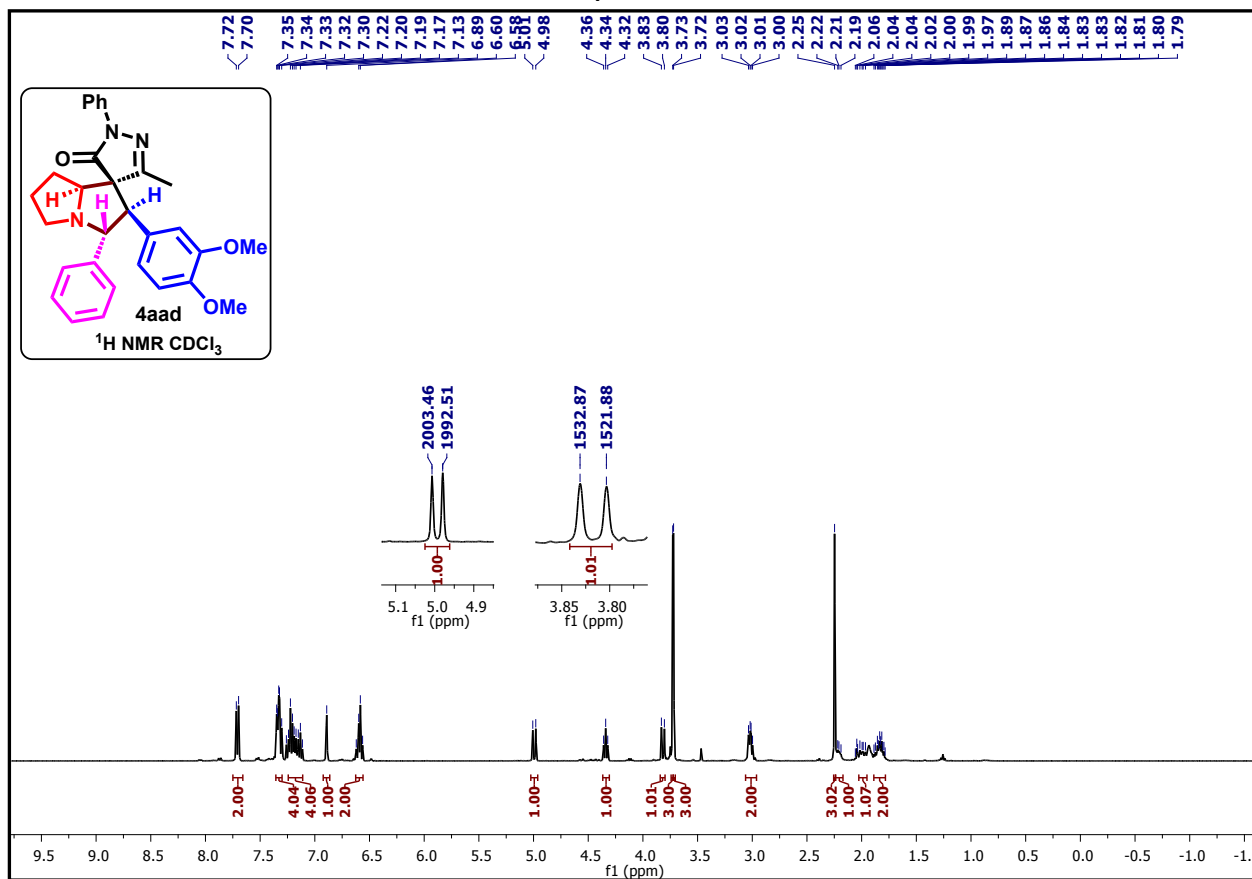

### <sup>13</sup>C NMR spectra of 4aad

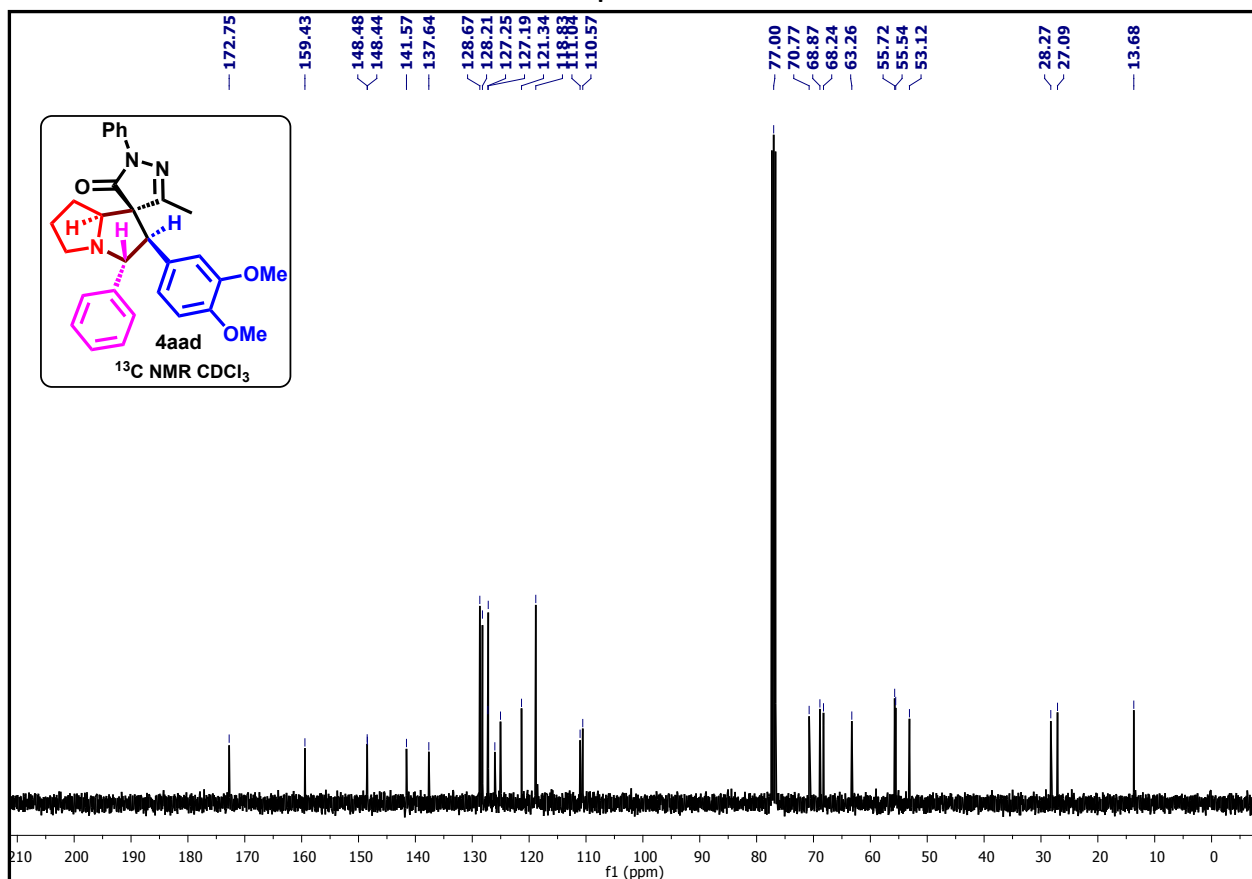

### <sup>1</sup>H NMR spectra of 4aae

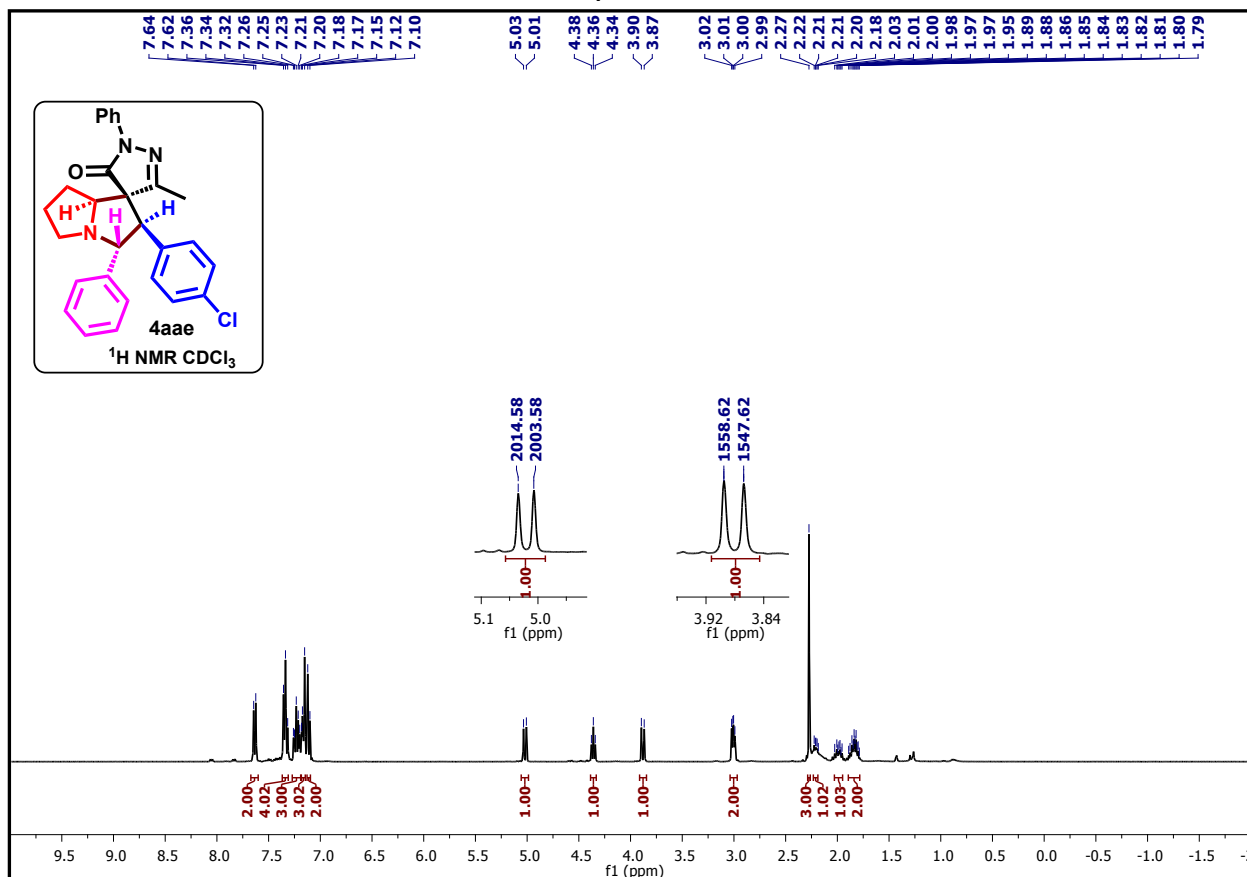

### <sup>13</sup>C NMR spectra of 4aae

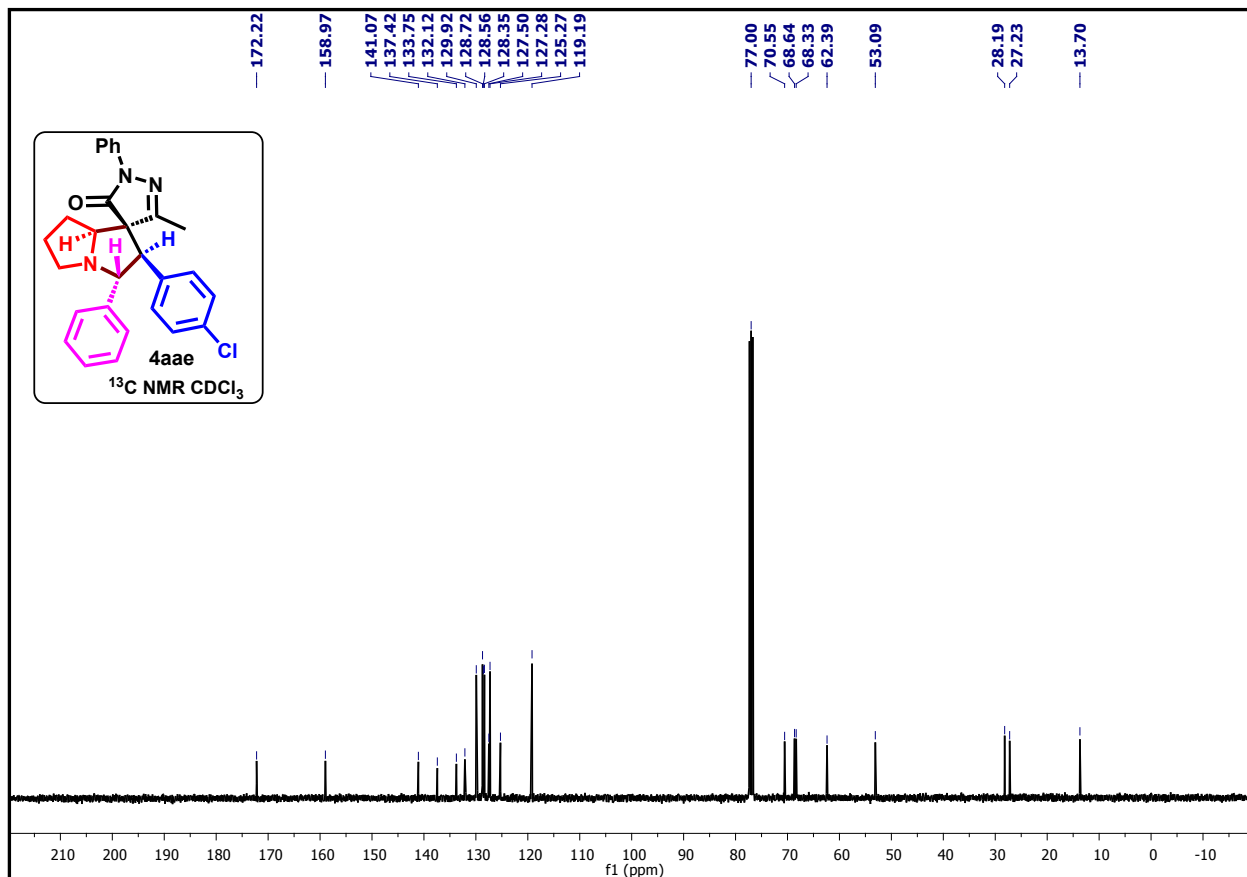

### <sup>1</sup>H NMR spectra of 4aaf

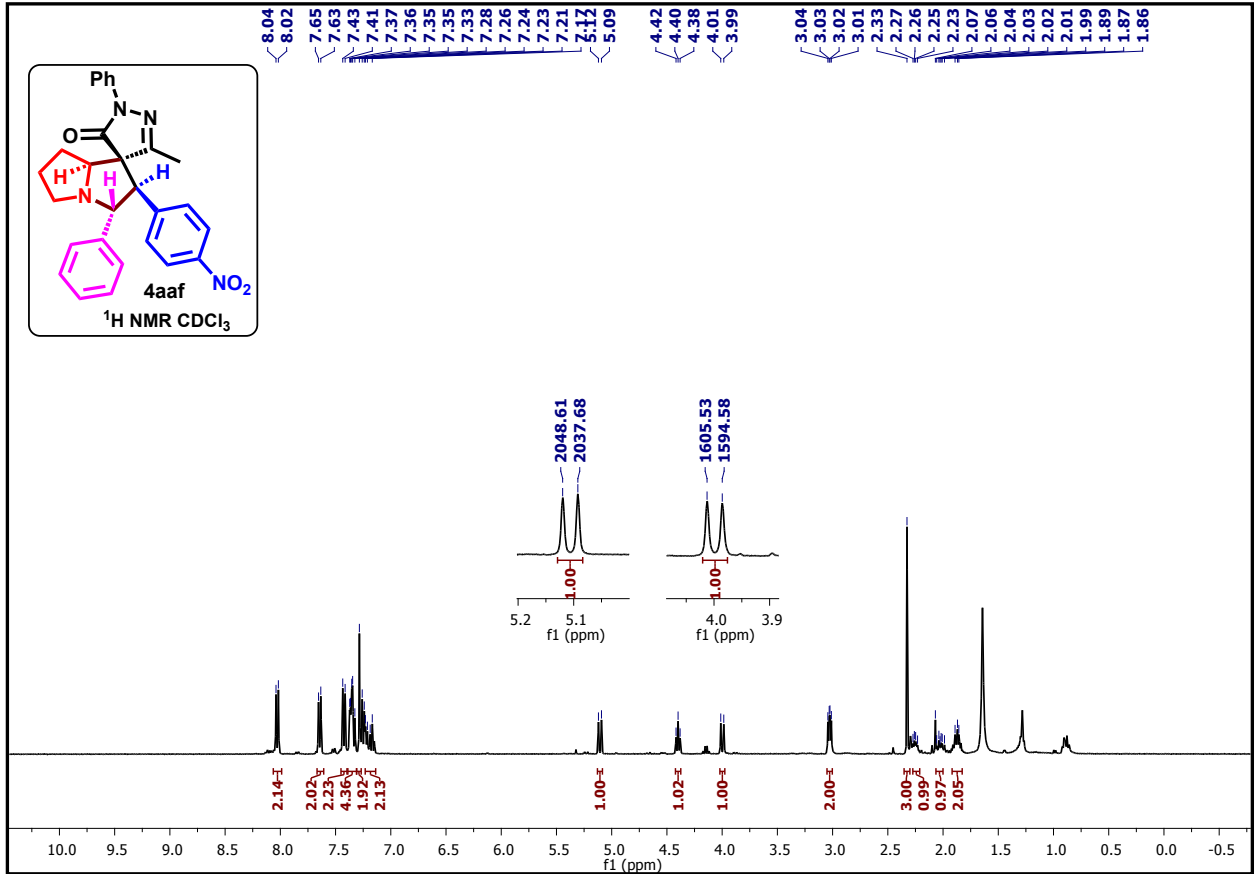

### <sup>13</sup>C NMR spectra of 4aaf

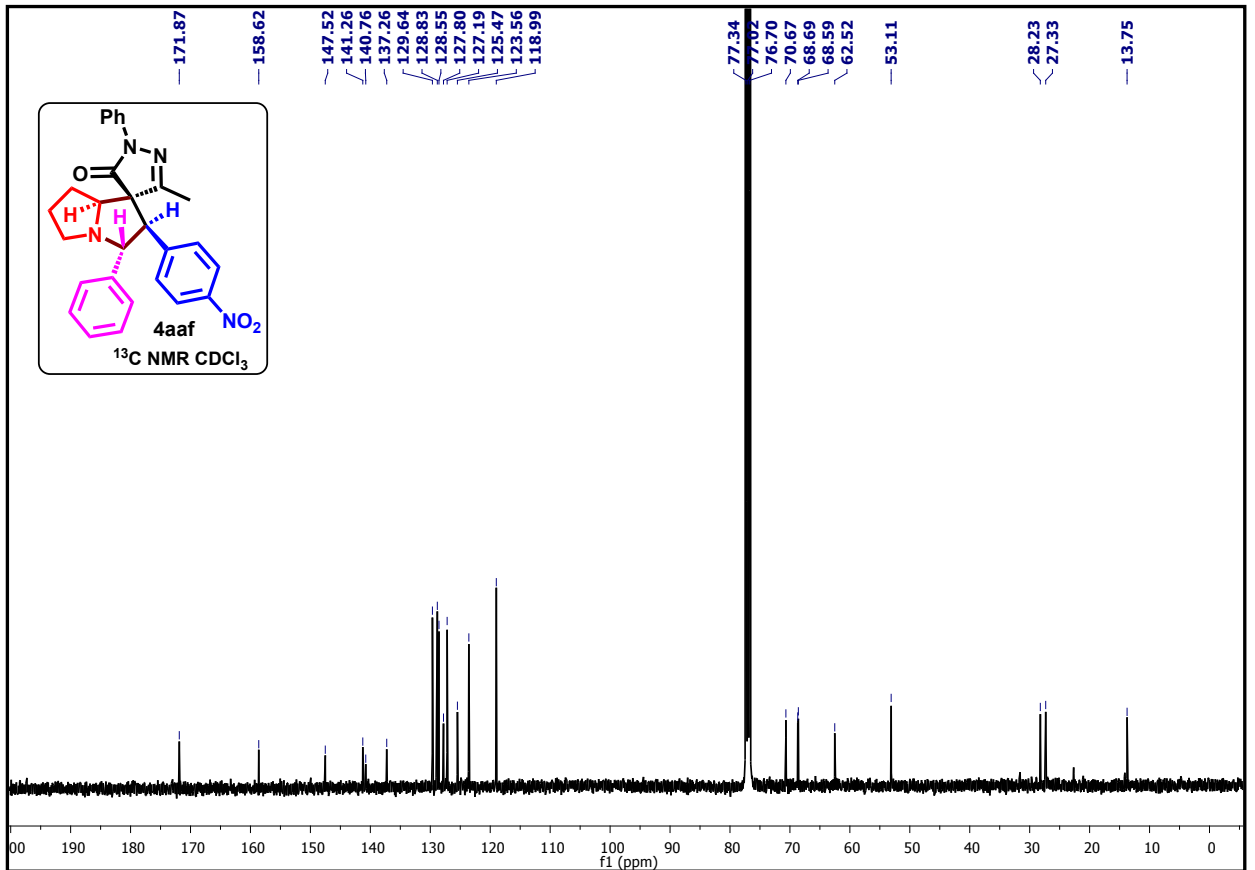

### <sup>1</sup>H NMR spectra of 4aag

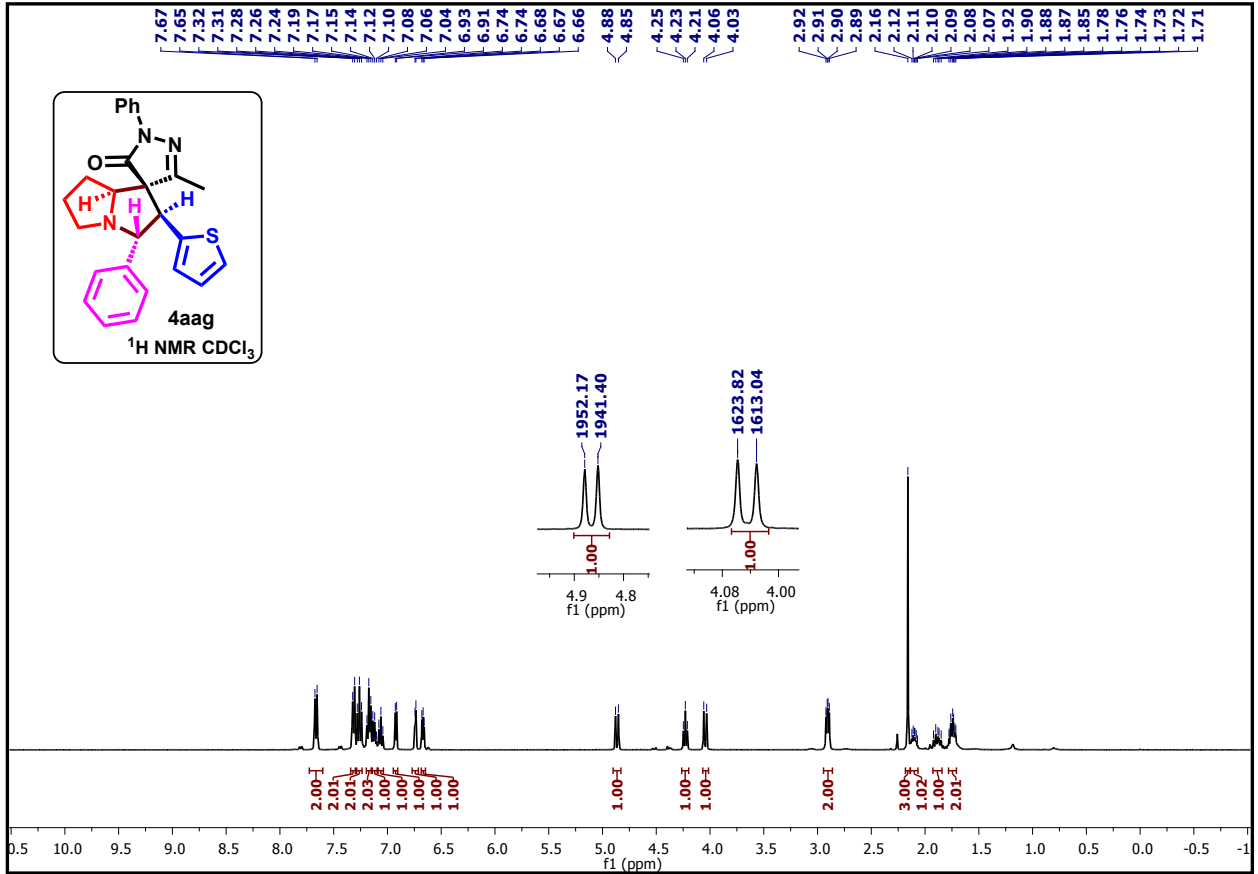

### <sup>13</sup>C NMR spectra of 4aag

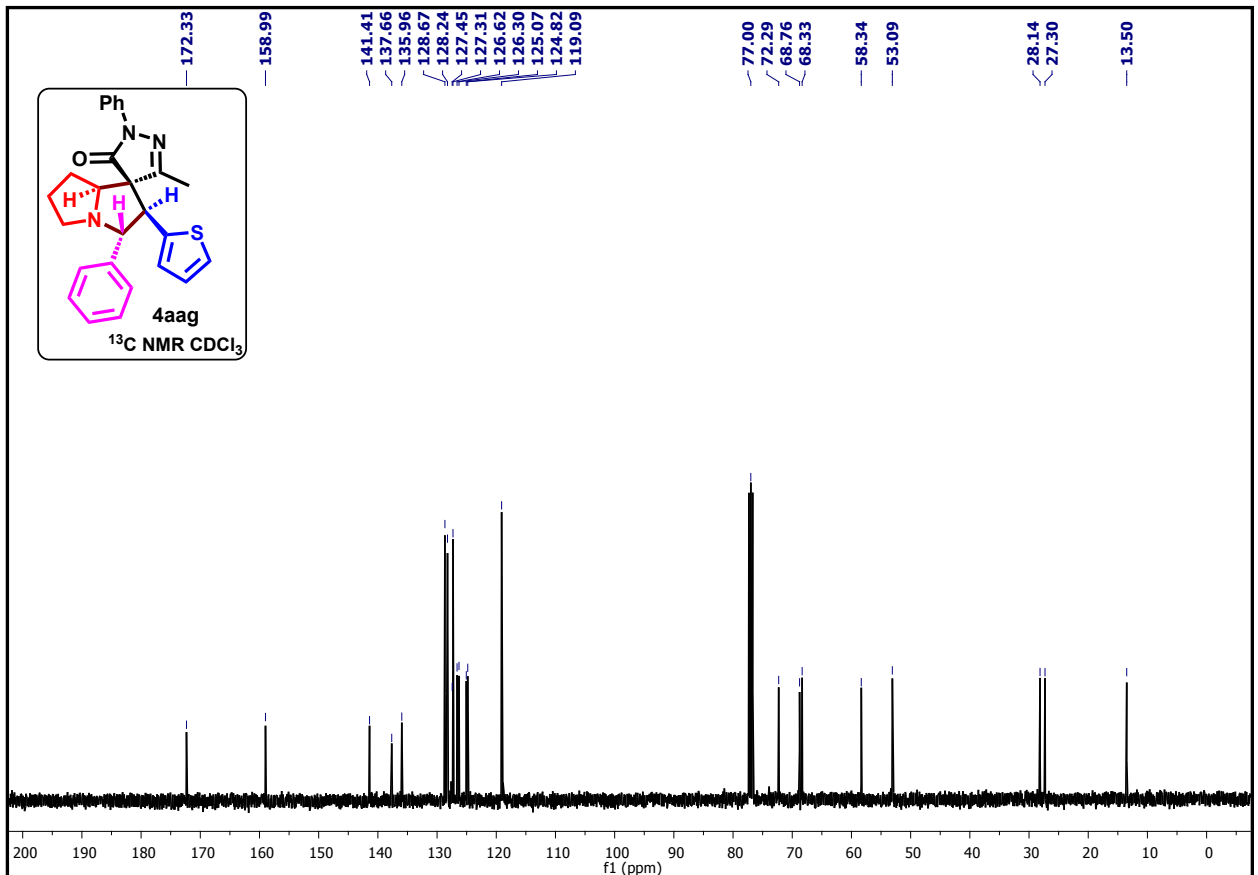

### <sup>1</sup>H NMR spectra of 4aah

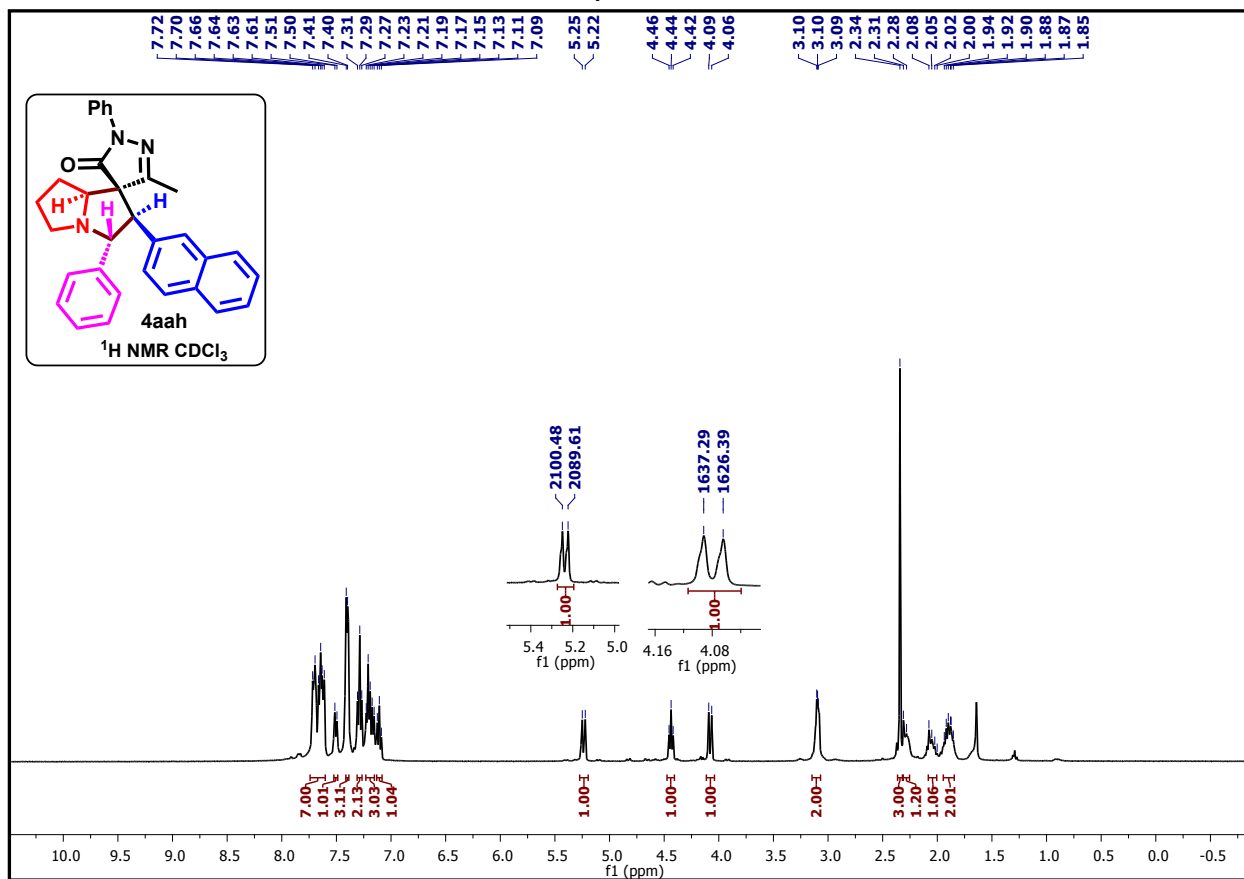

### <sup>13</sup>C NMR spectra of 4aah

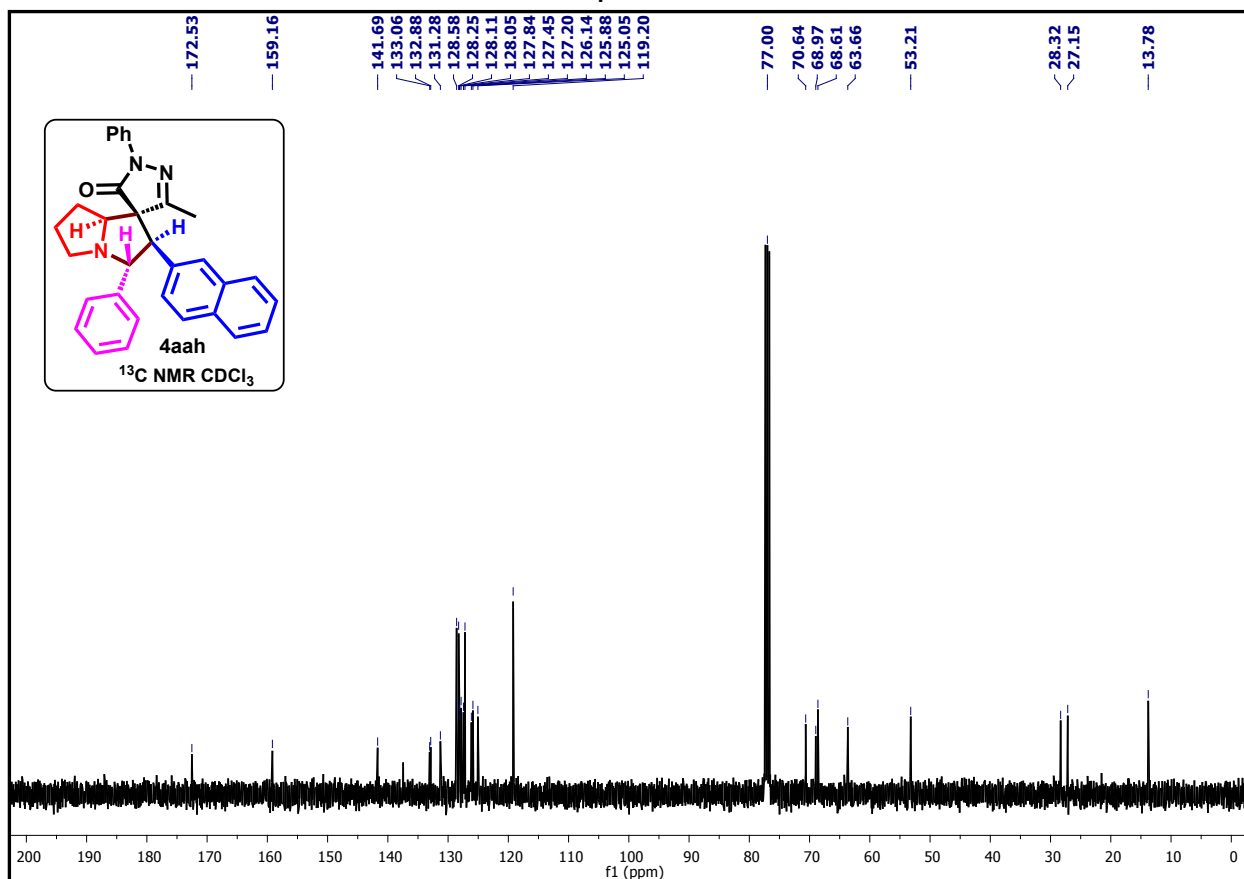

### <sup>1</sup>H NMR spectra of 4baa

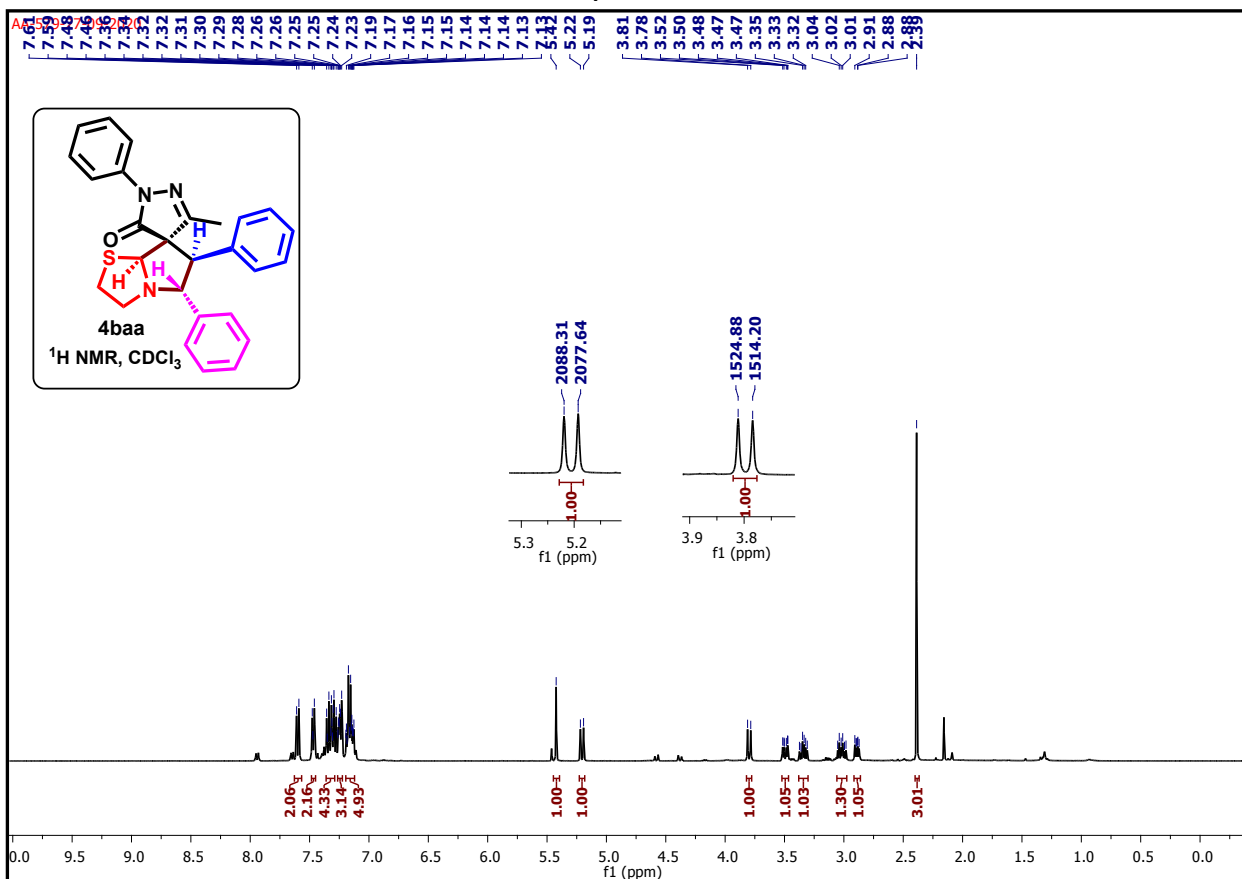

### <sup>13</sup>C NMR spectra of 4baa

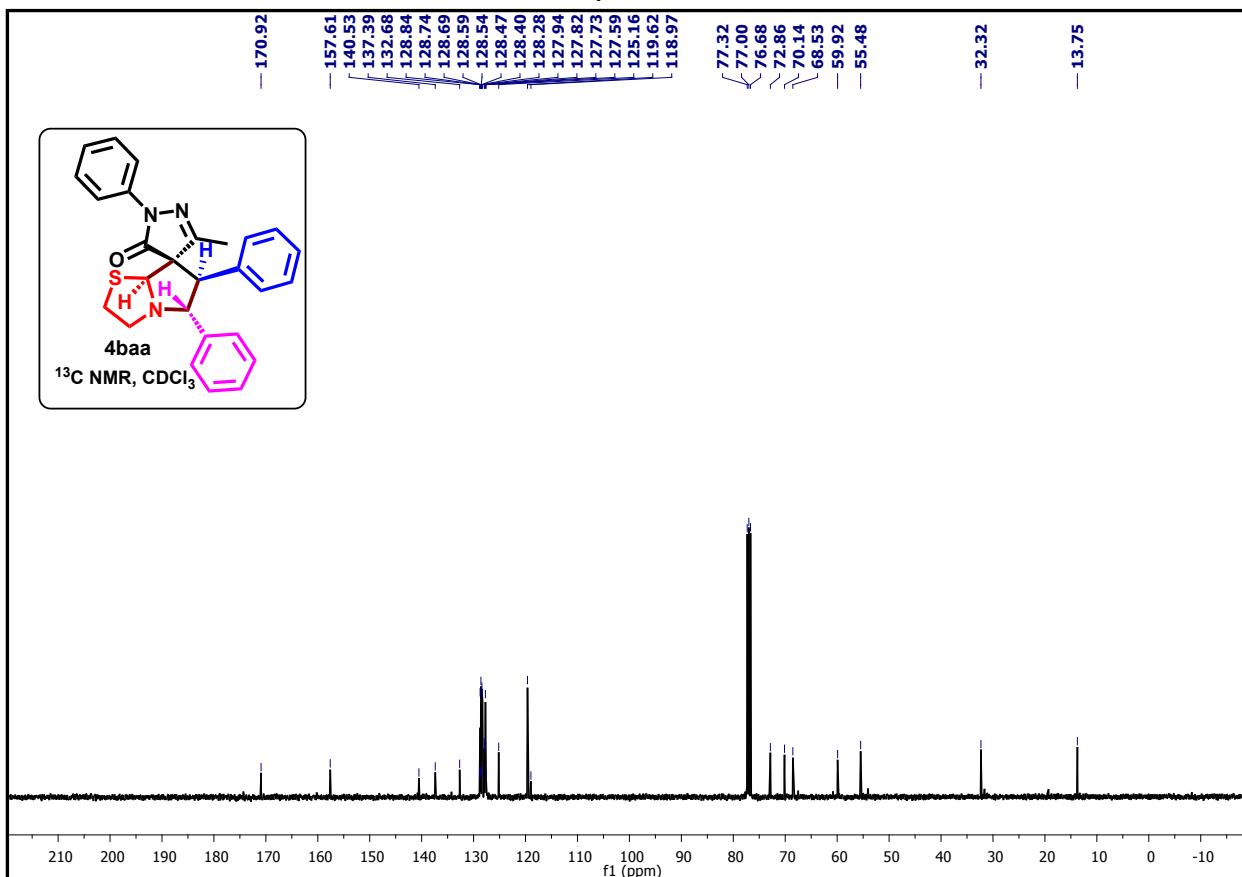

### <sup>1</sup>H NMR spectra of 4caa

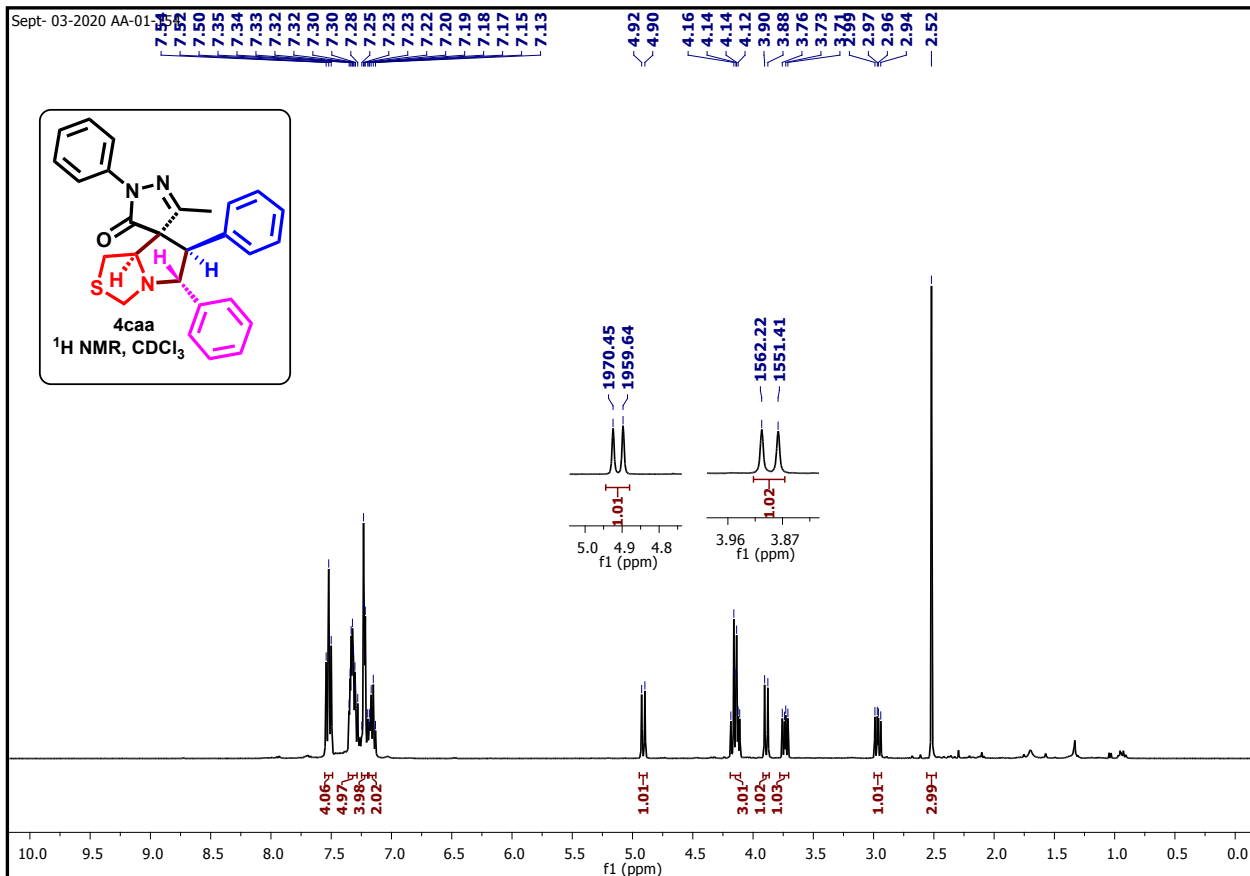

### <sup>13</sup>C NMR spectra of 4caa

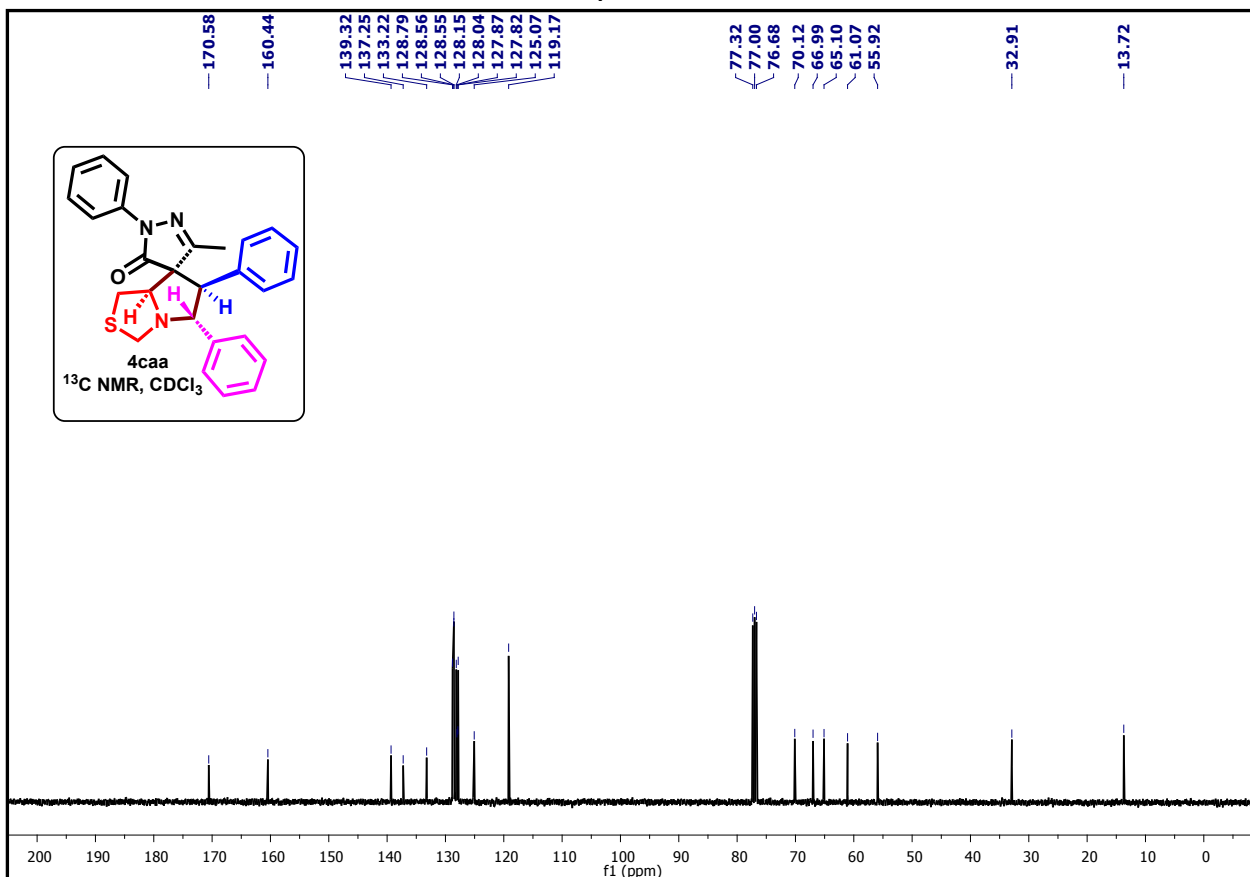



### <sup>1</sup>H NMR spectra of 4daa

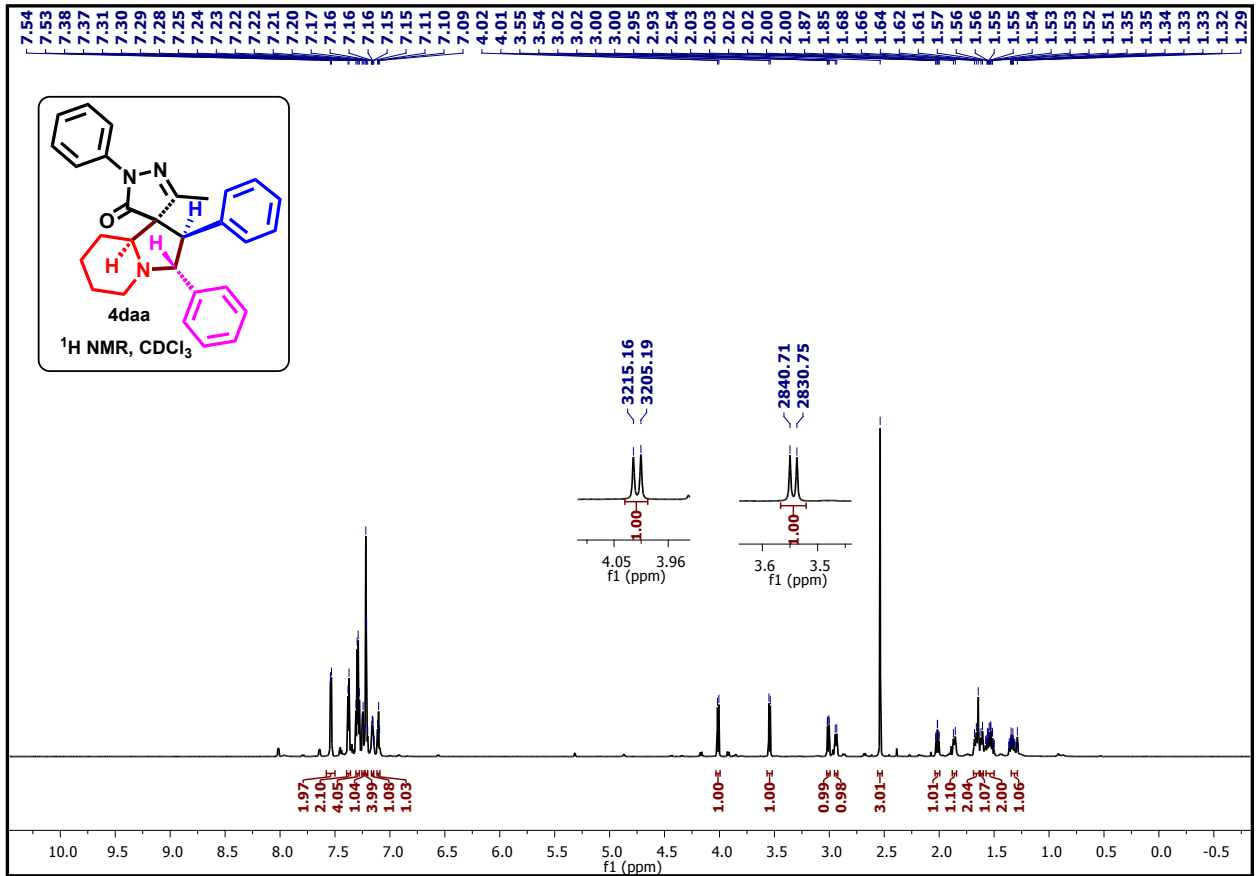

### <sup>13</sup>C NMR spectra of 4daa

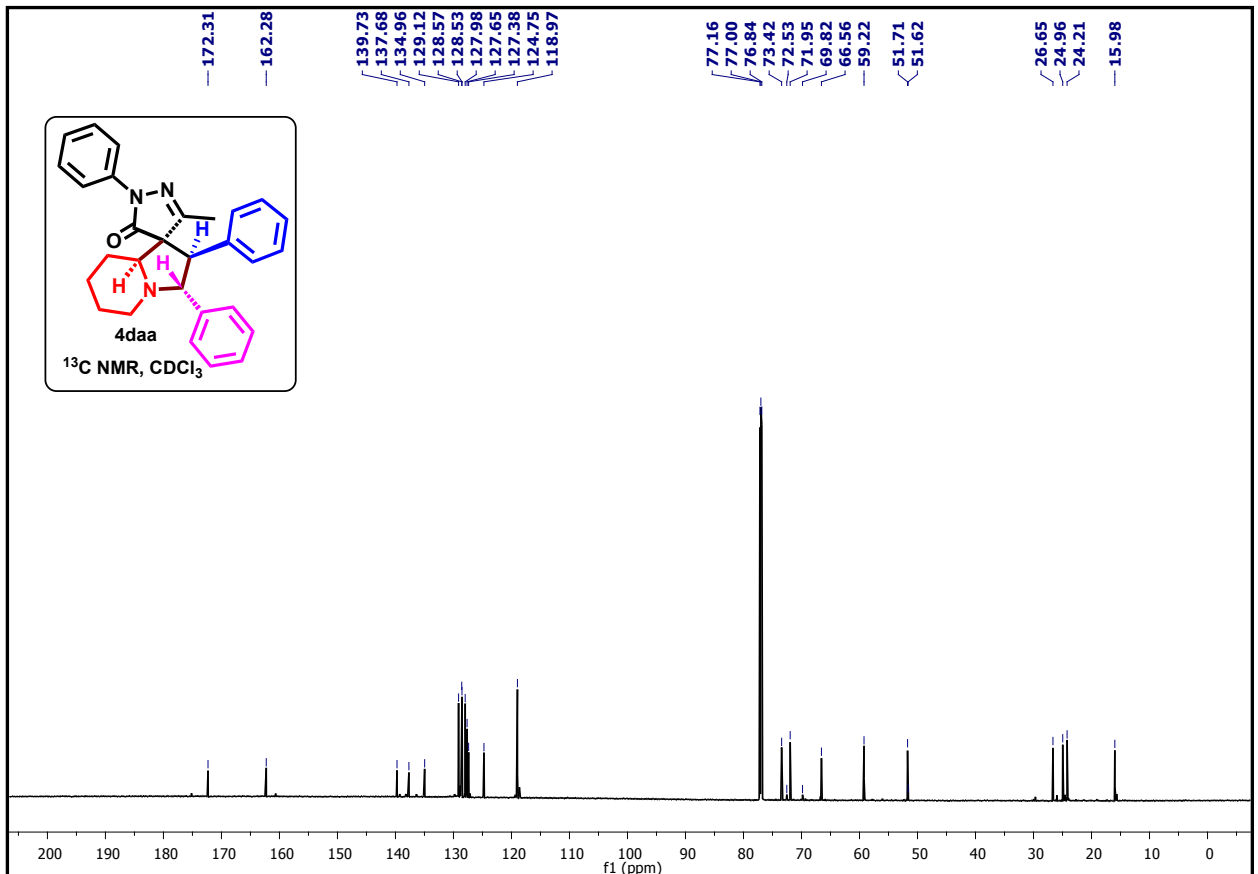

### <sup>1</sup>H NMR spectra of 4aai

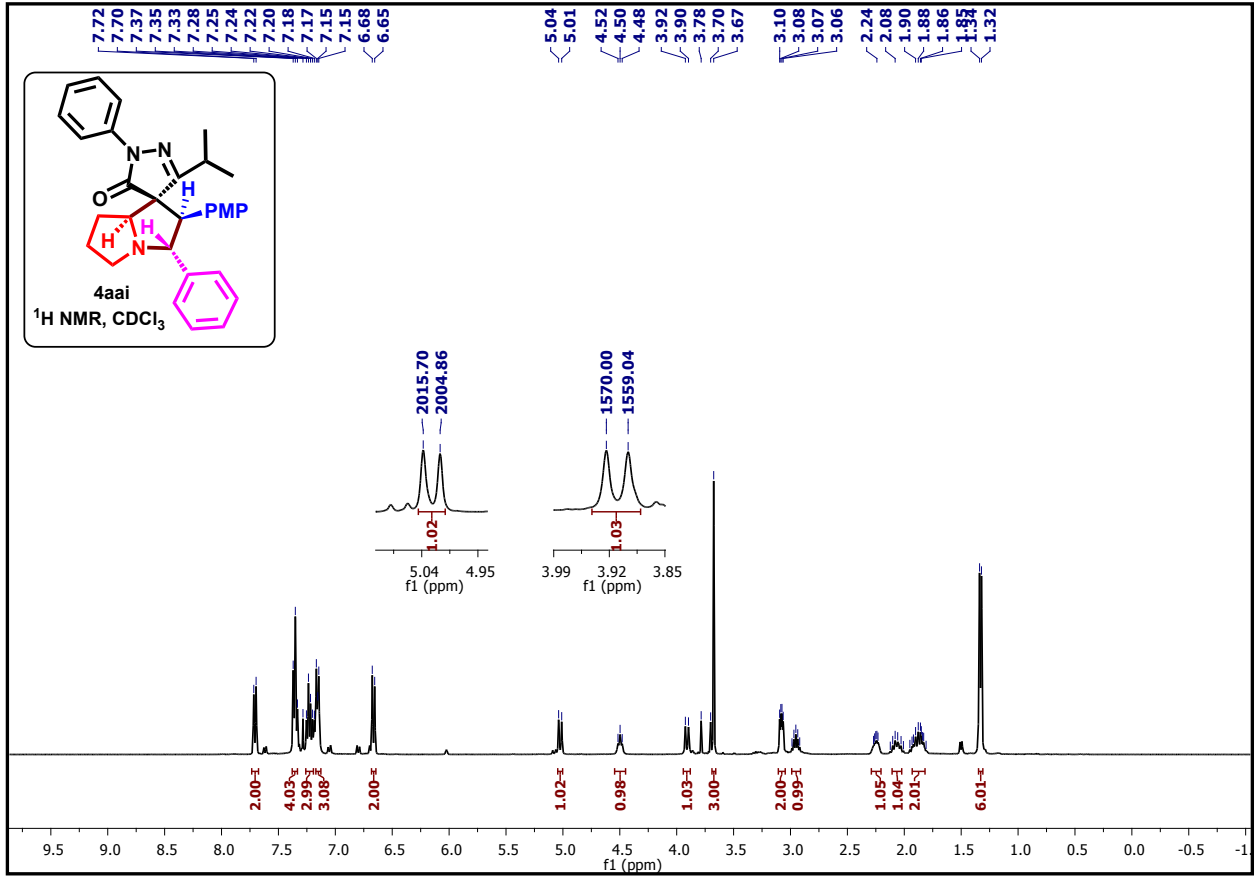

### <sup>13</sup>C NMR spectra of 4aai

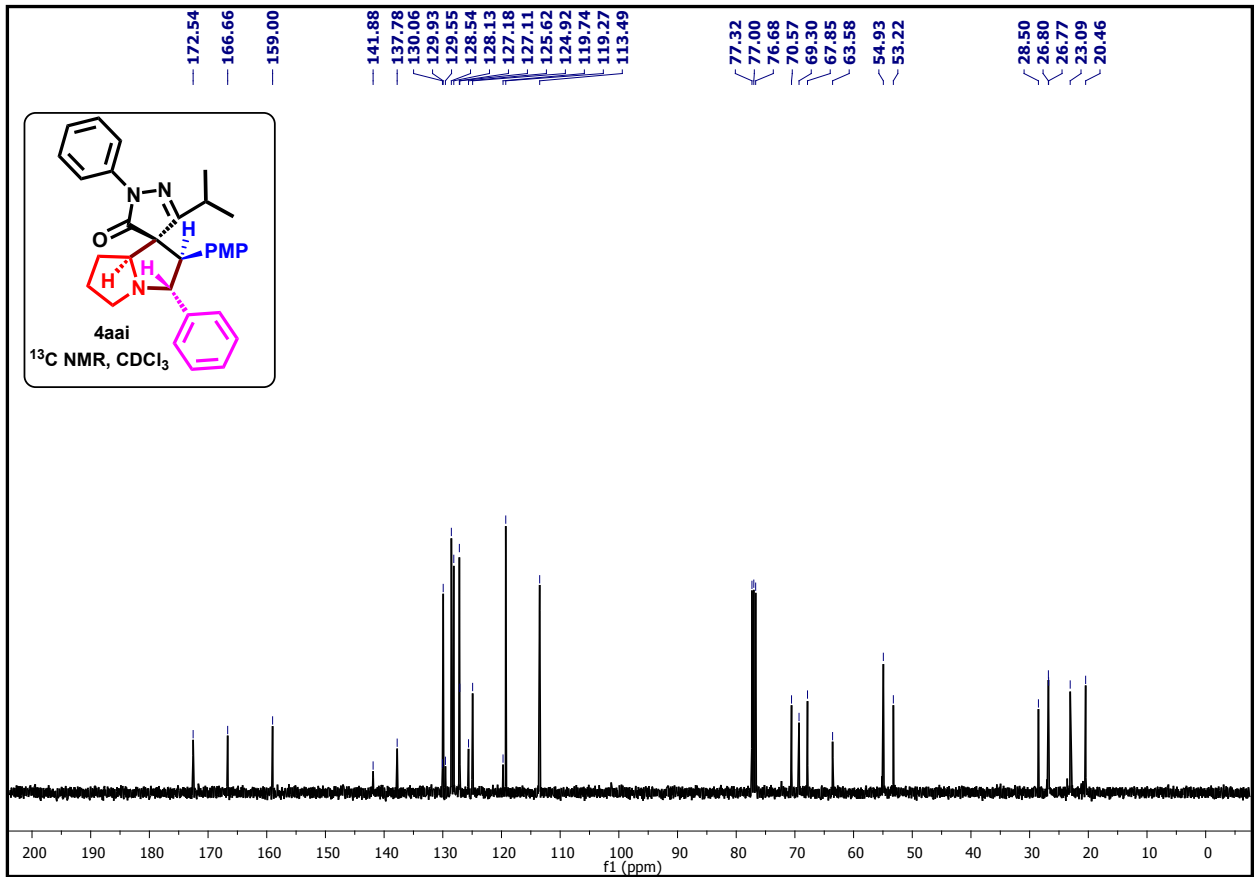

### <sup>1</sup>H NMR spectra of 4bai

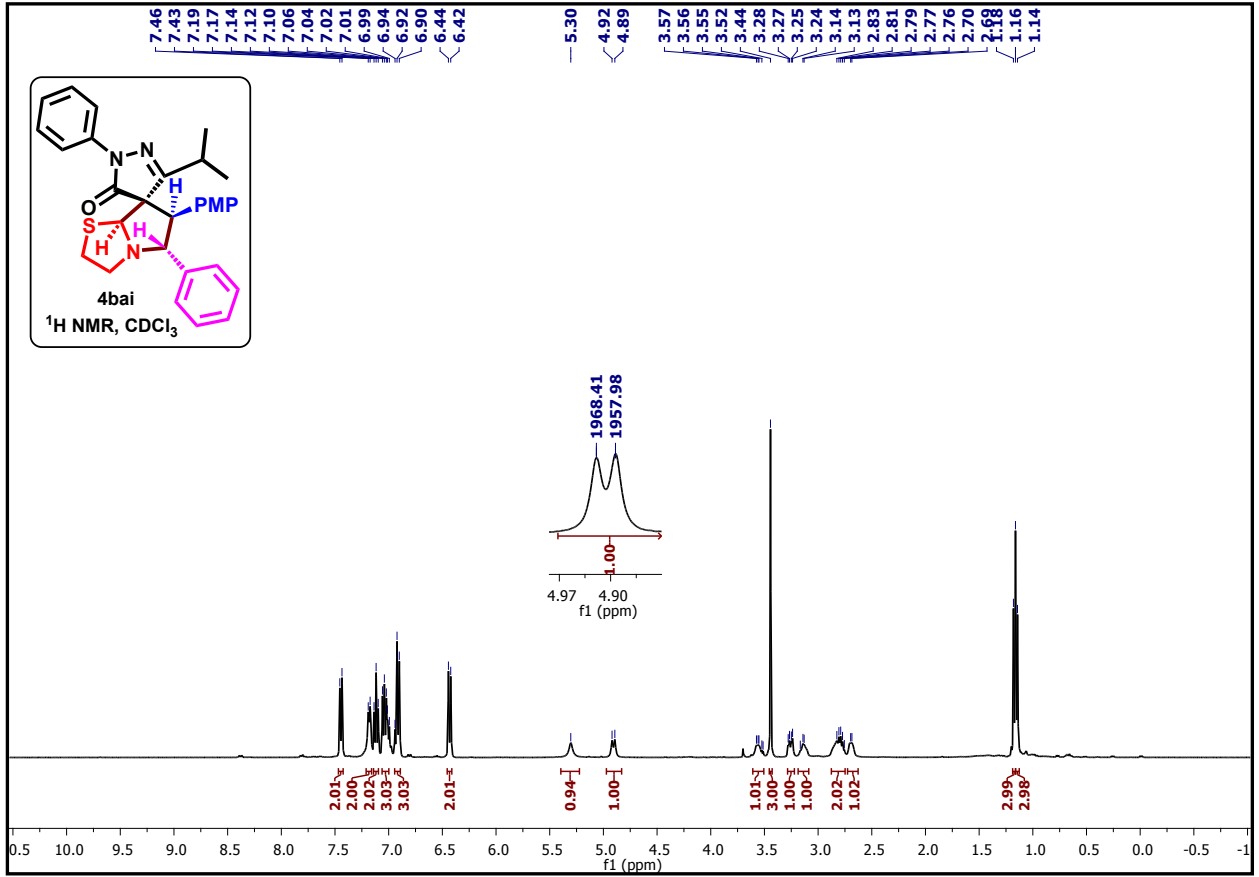

### <sup>13</sup>C NMR spectra of 4bai

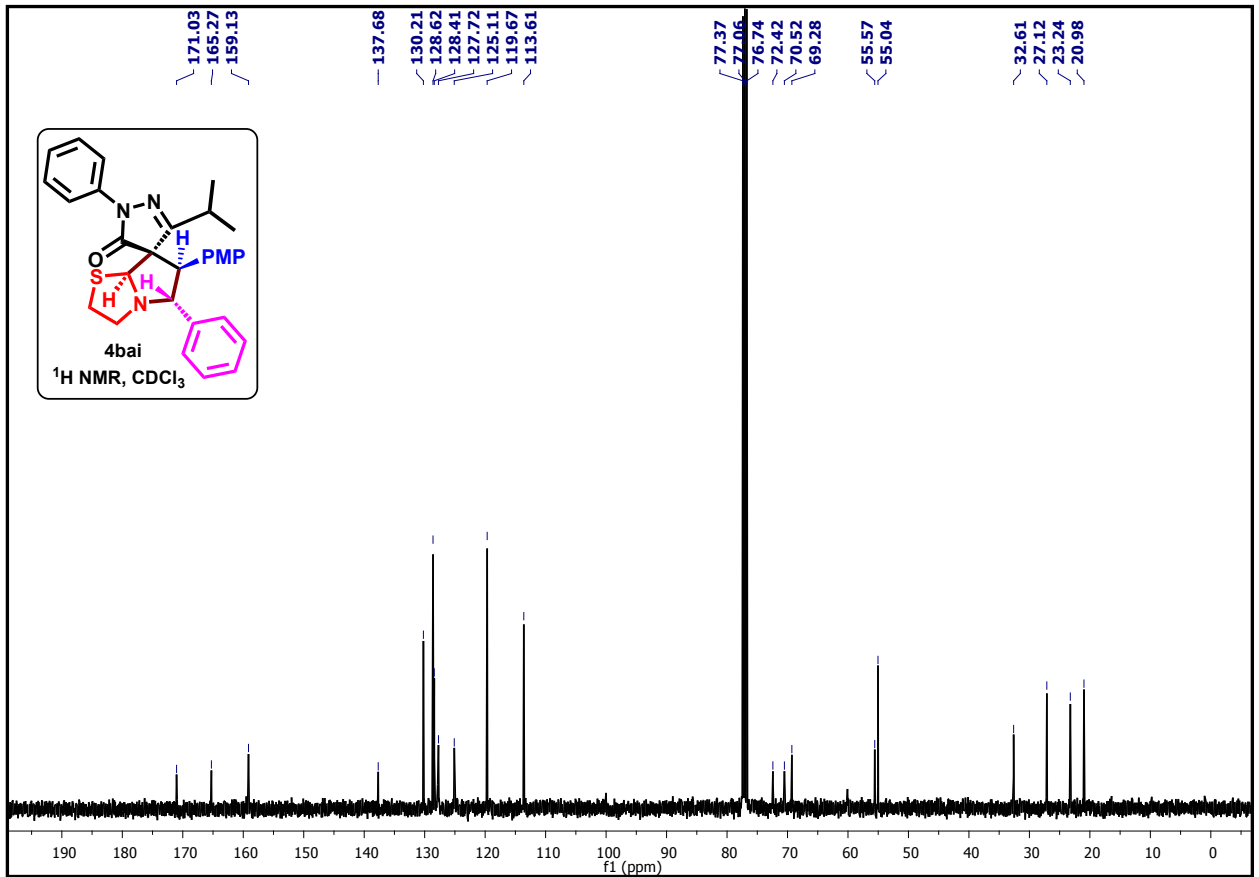

### <sup>1</sup>H NMR spectra of 4dad

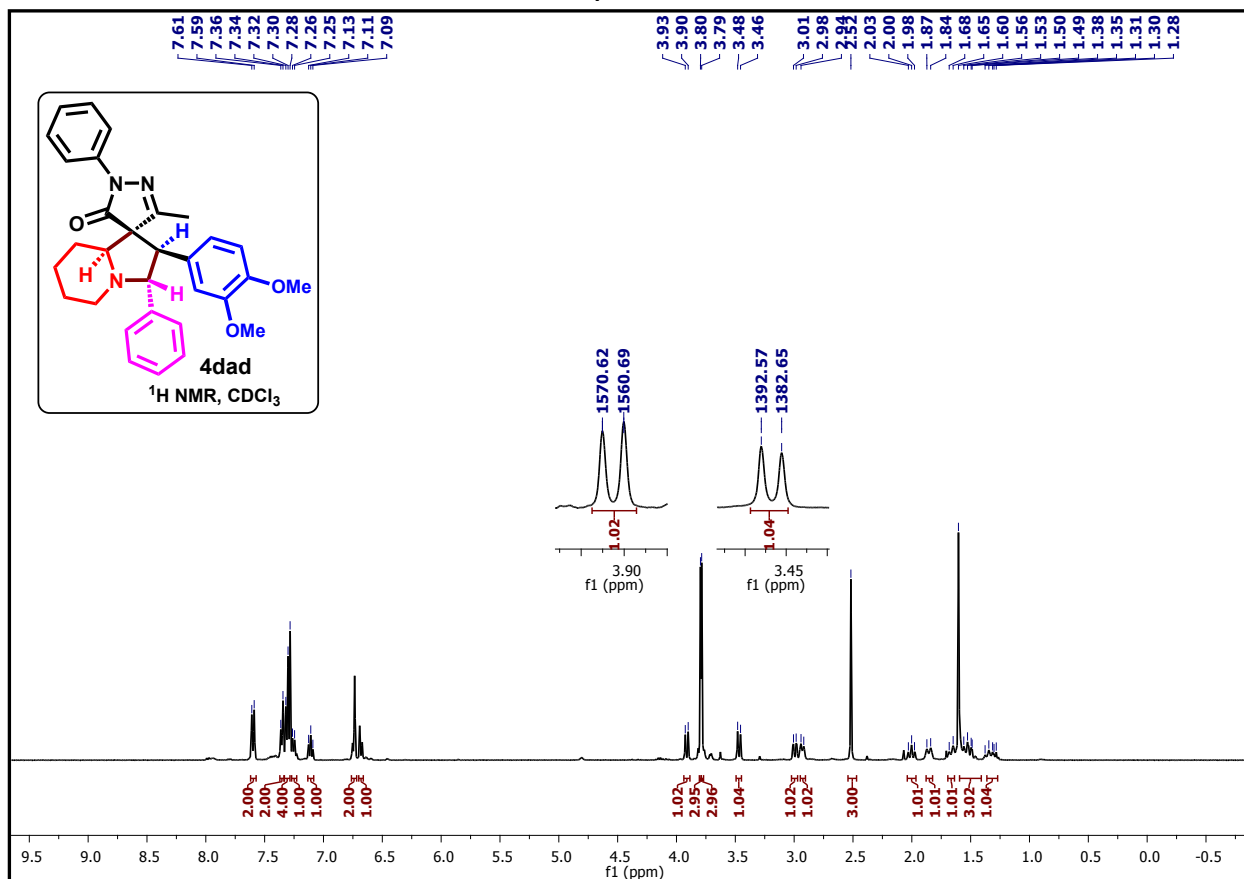

### <sup>13</sup>C NMR spectra of 4dad

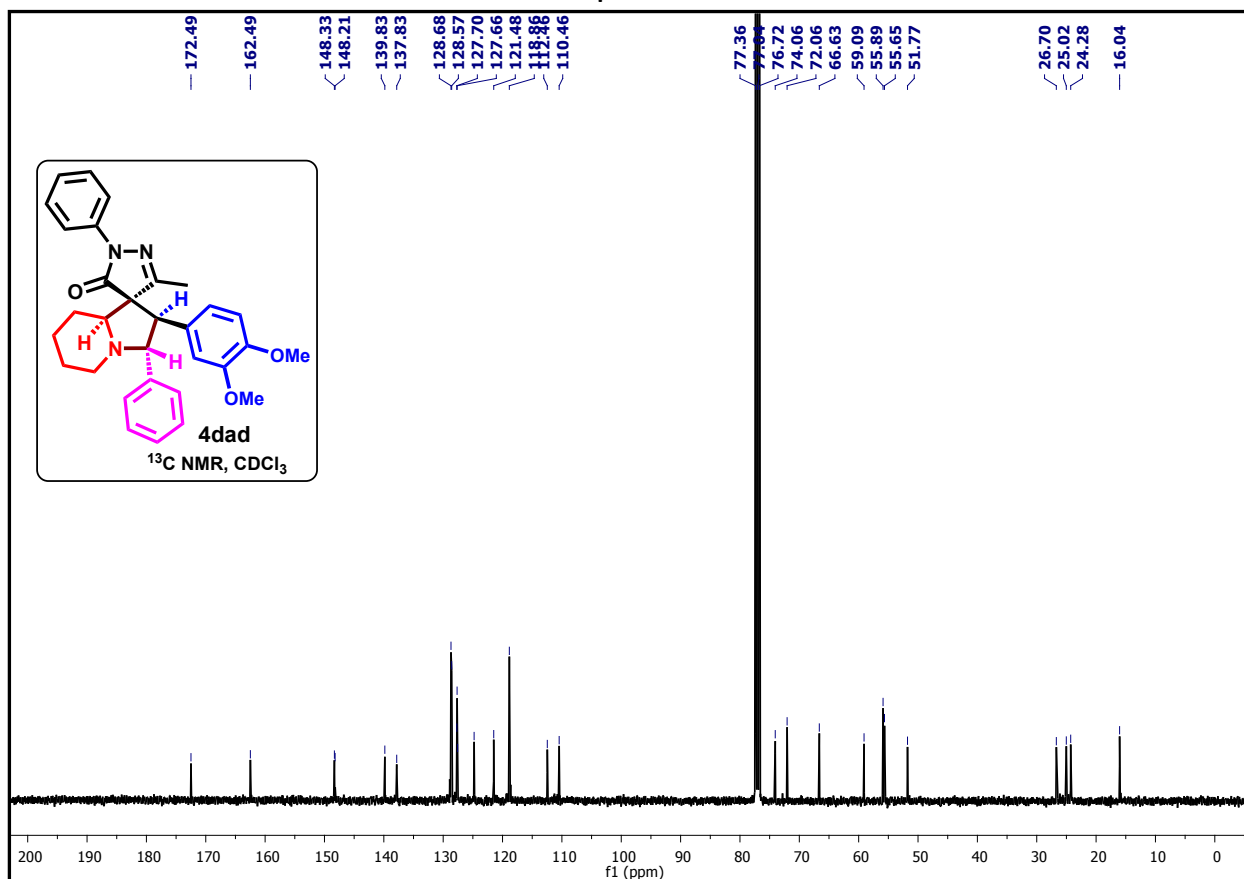

Supplement: d0nj05915c1.pdf [file d0nj05915c1.pdf]
